# Supplementary material for: Altered mRNAs Profiles in the Testis of Patients With “Secondary Idiopathic Non-Obstructive Azoospermia”
Source: Front Cell Dev Biol. 2022 May 12;10:824596. doi: 10.3389/fcell.2022.824596 (PMC9133692; doi:10.3389/fcell.2022.824596)
Supplement: Supplementary file 5 [file Table6.XLSX]

## Sheet: case_vs_control
ID	Subontologies	Description	GeneRatio	BgRatio	pvalue	p.adjust	qvalue	Subontologies
GO:0031514	MF	motile cilium	139/8443	177/19659	3.00712e-22	2.30947e-19	1.75679e-19	CC
GO:0022412	MF	cellular process involved in reproduction in multicellular organism	239/7844	350/18493	5.85322e-23	3.72148e-19	2.77258e-19	BP
GO:0031012	MF	extracellular matrix	313/8443	490/19659	3.1157e-21	1.19643e-18	9.10113e-19	CC
GO:0044441	MF	ciliary part	285/8443	441/19659	1.61831e-20	4.14286e-18	3.15144e-18	CC
GO:0062023	MF	collagen-containing extracellular matrix	224/8443	332/19659	9.24649e-20	1.77533e-17	1.35047e-17	CC
GO:0044782	MF	cilium organization	248/7844	382/18493	3.05261e-19	9.70424e-16	7.22986e-16	BP
GO:0097223	MF	sperm part	137/8443	188/19659	6.58404e-17	1.01131e-14	7.69293e-15	CC
GO:0060271	MF	cilium assembly	235/7844	366/18493	1.95517e-17	4.14366e-14	3.08711e-14	BP
GO:0009566	MF	fertilization	130/7844	177/18493	4.1687e-17	6.62616e-14	4.93662e-14	BP
GO:0043062	MF	extracellular structure organization	252/7844	402/18493	1.11792e-16	1.42154e-13	1.05908e-13	BP
GO:0030198	MF	extracellular matrix organization	223/7844	348/18493	1.81066e-16	1.76462e-13	1.31468e-13	BP
GO:0007389	MF	pattern specification process	268/7844	434/18493	1.9428e-16	1.76462e-13	1.31468e-13	BP
GO:0007281	MF	germ cell development	170/7844	255/18493	3.38409e-15	2.68951e-12	2.00374e-12	BP
GO:0051321	MF	meiotic cell cycle	166/7844	249/18493	7.14357e-15	5.04653e-12	3.75977e-12	BP
GO:0048515	MF	spermatid differentiation	111/7844	152/18493	1.6046e-14	1.0202e-11	7.60073e-12	BP
GO:0007338	MF	single fertilization	106/7844	144/18493	2.56284e-14	1.48132e-11	1.10362e-11	BP
GO:0007286	MF	spermatid development	106/7844	146/18493	1.18438e-13	6.27522e-11	4.67517e-11	BP
GO:0003341	MF	cilium movement	55/7844	63/18493	1.56364e-13	7.64739e-11	5.69746e-11	BP
GO:0003002	MF	regionalization	210/7844	341/18493	5.25323e-13	2.38572e-10	1.77741e-10	BP
GO:0048732	MF	gland development	257/7844	434/18493	8.0129e-13	3.39603e-10	2.53012e-10	BP
GO:0034765	MF	regulation of ion transmembrane transport	267/7844	454/18493	8.54617e-13	3.39603e-10	2.53012e-10	BP
GO:0007548	MF	sex differentiation	171/7844	268/18493	1.02709e-12	3.84131e-10	2.86185e-10	BP
GO:0043235	MF	receptor complex	238/8443	396/19659	3.14422e-12	4.0246e-10	3.06148e-10	CC
GO:0098857	MF	membrane microdomain	189/8443	305/19659	1.30765e-11	1.43468e-09	1.09135e-09	CC
GO:0097729	MF	9+2 motile cilium	73/8443	95/19659	1.64764e-11	1.58173e-09	1.20321e-09	CC
GO:0045121	MF	membrane raft	188/8443	304/19659	1.90812e-11	1.62826e-09	1.2386e-09	CC
GO:0140013	MF	meiotic nuclear division	117/7844	171/18493	4.8852e-12	1.72556e-09	1.28558e-09	BP
GO:0098589	MF	membrane region	194/8443	316/19659	2.32238e-11	1.78359e-09	1.35676e-09	CC
GO:0035082	MF	axoneme assembly	52/7844	61/18493	5.46957e-12	1.83029e-09	1.3636e-09	BP
GO:1903046	MF	meiotic cell cycle process	126/7844	188/18493	7.10728e-12	2.2594e-09	1.6833e-09	BP
GO:0030317	MF	flagellated sperm motility	69/7844	89/18493	1.4386e-11	4.15755e-09	3.09746e-09	BP
GO:0097722	MF	sperm motility	69/7844	89/18493	1.4386e-11	4.15755e-09	3.09746e-09	BP
GO:0036126	MF	sperm flagellum	69/8443	90/19659	7.11781e-11	4.96953e-09	3.78027e-09	CC
GO:0007018	MF	microtubule-based movement	168/7844	269/18493	2.17136e-11	6.00239e-09	4.47191e-09	BP
GO:0048608	MF	reproductive structure development	248/7844	428/18493	4.61449e-11	1.1739e-08	8.74577e-09	BP
GO:0000280	MF	nuclear division	242/7844	416/18493	4.61582e-11	1.1739e-08	8.74577e-09	BP
GO:0001655	MF	urogenital system development	194/7844	322/18493	6.45132e-11	1.57759e-08	1.17534e-08	BP
GO:0048705	MF	skeletal system morphogenesis	149/7844	236/18493	9.20769e-11	2.11017e-08	1.57212e-08	BP
GO:0048562	MF	embryonic organ morphogenesis	174/7844	284/18493	9.293e-11	2.11017e-08	1.57212e-08	BP
GO:0061458	MF	reproductive system development	248/7844	431/18493	1.20608e-10	2.64422e-08	1.97e-08	BP
GO:0001669	MF	acrosomal vesicle	77/8443	106/19659	5.17562e-10	3.3124e-08	2.51971e-08	CC
GO:0048568	MF	embryonic organ development	243/7844	422/18493	1.68085e-10	3.56229e-08	2.65398e-08	BP
GO:0005201	MF	extracellular matrix structural constituent	110/7872	155/17632	2.54003e-11	3.04295e-08	2.67371e-08	MF
GO:0035036	MF	sperm-egg recognition	45/7844	53/18493	2.00975e-10	4.12193e-08	3.07092e-08	BP
GO:1902495	MF	transmembrane transporter complex	194/8443	325/19659	7.00628e-10	4.13909e-08	3.14857e-08	CC
GO:0048285	MF	organelle fission	260/7844	458/18493	2.82413e-10	5.61119e-08	4.18045e-08	BP
GO:0045137	MF	development of primary sexual characteristics	140/7844	222/18493	3.78584e-10	7.29405e-08	5.43422e-08	BP
GO:0034702	MF	ion channel complex	180/8443	301/19659	2.34666e-09	1.28731e-07	9.79247e-08	CC
GO:0008406	MF	gonad development	136/7844	216/18493	7.84403e-10	1.46683e-07	1.09282e-07	BP
GO:0072001	MF	renal system development	172/7844	286/18493	9.36846e-10	1.70185e-07	1.26791e-07	BP
GO:0003007	MF	heart morphogenesis	155/7844	253/18493	9.75609e-10	1.72303e-07	1.2837e-07	BP
GO:0001578	MF	microtubule bundle formation	66/7844	89/18493	1.14538e-09	1.90897e-07	1.42222e-07	BP
GO:0045132	MF	meiotic chromosome segregation	66/7844	89/18493	1.14538e-09	1.90897e-07	1.42222e-07	BP
GO:0060485	MF	mesenchyme development	163/7844	269/18493	1.17097e-09	1.90897e-07	1.42222e-07	BP
GO:0002062	MF	chondrocyte differentiation	82/7844	117/18493	1.2114e-09	1.92552e-07	1.43455e-07	BP
GO:0046661	MF	male sex differentiation	104/7844	157/18493	1.3024e-09	2.01967e-07	1.5047e-07	BP
GO:0061982	MF	meiosis I cell cycle process	82/7844	118/18493	2.32208e-09	3.51518e-07	2.61888e-07	BP
GO:0001822	MF	kidney development	163/7844	271/18493	2.52243e-09	3.72968e-07	2.77869e-07	BP
GO:0007127	MF	meiosis I	79/7844	113/18493	2.91722e-09	4.21538e-07	3.14054e-07	BP
GO:0048880	MF	sensory system development	206/7844	357/18493	3.22626e-09	4.55834e-07	3.39606e-07	BP
GO:0036064	MF	ciliary basal body	82/8443	119/19659	8.78594e-09	4.4984e-07	3.42189e-07	CC
GO:0002009	MF	morphogenesis of an epithelium	266/7844	479/18493	3.38337e-09	4.64791e-07	3.46279e-07	BP
GO:0051216	MF	cartilage development	129/7844	206/18493	3.49567e-09	4.64791e-07	3.46279e-07	BP
GO:0042063	MF	gliogenesis	160/7844	266/18493	3.50896e-09	4.64791e-07	3.46279e-07	BP
GO:0007140	MF	male meiotic nuclear division	39/7844	46/18493	3.6721e-09	4.76473e-07	3.54982e-07	BP
GO:1990351	MF	transporter complex	194/8443	333/19659	1.06315e-08	5.1031e-07	3.88188e-07	CC
GO:1904062	MF	regulation of cation transmembrane transport	184/7844	314/18493	4.40878e-09	5.46644e-07	4.07261e-07	BP
GO:0150063	MF	visual system development	203/7844	352/18493	4.46634e-09	5.46644e-07	4.07261e-07	BP
GO:0009988	MF	cell-cell recognition	55/7844	72/18493	4.47082e-09	5.46644e-07	4.07261e-07	BP
GO:0061448	MF	connective tissue development	158/7844	263/18493	4.95874e-09	5.94861e-07	4.43184e-07	BP
GO:0001654	MF	eye development	202/7844	351/18493	6.14812e-09	7.09855e-07	5.28857e-07	BP
GO:0048736	MF	appendage development	112/7844	175/18493	6.25226e-09	7.09855e-07	5.28857e-07	BP
GO:0060173	MF	limb development	112/7844	175/18493	6.25226e-09	7.09855e-07	5.28857e-07	BP
GO:0003013	MF	circulatory system process	274/7844	500/18493	1.10289e-08	1.2302e-06	9.16527e-07	BP
GO:0006936	MF	muscle contraction	201/7844	351/18493	1.1524e-08	1.26327e-06	9.41164e-07	BP
GO:0002576	MF	platelet degranulation	86/7844	128/18493	1.23708e-08	1.33311e-06	9.93193e-07	BP
GO:0097060	MF	synaptic membrane	241/8443	431/19659	3.03597e-08	1.34004e-06	1.01935e-06	CC
GO:0044420	MF	extracellular matrix component	40/8443	49/19659	3.14071e-08	1.34004e-06	1.01935e-06	CC
GO:0048469	MF	cell maturation	108/7844	169/18493	1.30614e-08	1.38407e-06	1.03116e-06	BP
GO:0008015	MF	blood circulation	269/7844	492/18493	1.99009e-08	2.07426e-06	1.54537e-06	BP
GO:0097014	MF	ciliary plasm	78/8443	115/19659	5.91119e-08	2.38936e-06	1.81757e-06	CC
GO:0035107	MF	appendage morphogenesis	95/7844	146/18493	2.59206e-08	2.61592e-06	1.94892e-06	BP
GO:0035108	MF	limb morphogenesis	95/7844	146/18493	2.59206e-08	2.61592e-06	1.94892e-06	BP
GO:0070192	MF	chromosome organization involved in meiotic cell cycle	49/7844	64/18493	2.74969e-08	2.73164e-06	2.03513e-06	BP
GO:0009952	MF	anterior/posterior pattern specification	129/7844	211/18493	2.88548e-08	2.81337e-06	2.09602e-06	BP
GO:0098813	MF	nuclear chromosome segregation	153/7844	258/18493	2.92046e-08	2.81337e-06	2.09602e-06	BP
GO:0045785	MF	positive regulation of cell adhesion	222/7844	397/18493	3.10182e-08	2.94349e-06	2.19296e-06	BP
GO:0034703	MF	cation channel complex	133/8443	219/19659	7.76322e-08	2.98108e-06	2.26768e-06	CC
GO:0070286	MF	axonemal dynein complex assembly	28/7844	31/18493	3.37017e-08	3.15111e-06	2.34764e-06	BP
GO:0044450	MF	microtubule organizing center part	112/8443	179/19659	8.7858e-08	3.21309e-06	2.44417e-06	CC
GO:0005930	MF	axoneme	77/8443	114/19659	9.42838e-08	3.29136e-06	2.50371e-06	CC
GO:0055123	MF	digestive system development	93/7844	143/18493	3.75988e-08	3.46454e-06	2.58115e-06	BP
GO:0022836	MF	gated channel activity	210/7872	351/17632	5.71062e-09	3.42066e-06	3.00559e-06	MF
GO:0048706	MF	embryonic skeletal system development	83/7844	125/18493	5.0103e-08	4.55078e-06	3.39043e-06	BP
GO:0005216	MF	ion channel activity	248/7872	427/17632	1.17233e-08	3.94908e-06	3.46988e-06	MF
GO:0022839	MF	ion gated channel activity	204/7872	342/17632	1.31856e-08	3.94908e-06	3.46988e-06	MF
GO:0001656	MF	metanephros development	63/7844	89/18493	5.45777e-08	4.8874e-06	3.64121e-06	BP
GO:0043010	MF	camera-type eye development	174/7844	302/18493	6.07771e-08	5.36695e-06	3.99849e-06	BP
GO:0045211	MF	postsynaptic membrane	184/8443	322/19659	1.70212e-07	5.68361e-06	4.32347e-06	CC
GO:0015267	MF	channel activity	267/7872	467/17632	2.47817e-08	5.44006e-06	4.77995e-06	MF
GO:0022838	MF	substrate-specific channel activity	254/7872	442/17632	2.92193e-08	5.44006e-06	4.77995e-06	MF
GO:0022803	MF	passive transmembrane transporter activity	267/7872	468/17632	3.23655e-08	5.44006e-06	4.77995e-06	MF
GO:0005518	MF	collagen binding	52/7872	67/17632	3.63276e-08	5.44006e-06	4.77995e-06	MF
GO:0003351	MF	epithelial cilium movement	22/7844	23/18493	8.59982e-08	7.49009e-06	5.58027e-06	BP
GO:0046546	MF	development of primary male sexual characteristics	88/7844	136/18493	1.22485e-07	1.05237e-05	7.84041e-06	BP
GO:0051924	MF	regulation of calcium ion transport	141/7844	239/18493	1.55448e-07	1.31779e-05	9.81778e-06	BP
GO:0070838	MF	divalent metal ion transport	249/7844	459/18493	1.6023e-07	1.34045e-05	9.98666e-06	BP
GO:0008584	MF	male gonad development	87/7844	135/18493	1.88888e-07	1.55967e-05	1.16199e-05	BP
GO:0034587	MF	piRNA metabolic process	18/7844	18/18493	1.95281e-07	1.59179e-05	1.18592e-05	BP
GO:0072511	MF	divalent inorganic cation transport	250/7844	462/18493	1.99764e-07	1.60772e-05	1.19778e-05	BP
GO:0031253	MF	cell projection membrane	188/8443	334/19659	5.27401e-07	1.68768e-05	1.28381e-05	CC
GO:0001228	MF	DNA-binding transcription activator activity, RNA polymerase II-specific	255/7872	449/17632	1.12013e-07	1.49101e-05	1.31009e-05	MF
GO:0043270	MF	positive regulation of ion transport	151/7844	260/18493	2.26168e-07	1.79747e-05	1.33916e-05	BP
GO:0005874	MF	microtubule	227/8443	414/19659	5.95525e-07	1.78541e-05	1.35815e-05	CC
GO:0000795	MF	synaptonemal complex	32/8443	39/19659	6.27684e-07	1.78541e-05	1.35815e-05	CC
GO:0099086	MF	synaptonemal structure	32/8443	39/19659	6.27684e-07	1.78541e-05	1.35815e-05	CC
GO:0098802	MF	plasma membrane receptor complex	112/8443	184/19659	6.79868e-07	1.86478e-05	1.41852e-05	CC
GO:0010959	MF	regulation of metal ion transport	208/7844	376/18493	2.50095e-07	1.96309e-05	1.46254e-05	BP
GO:0060537	MF	muscle tissue development	217/7844	395/18493	2.82296e-07	2.18172e-05	1.62543e-05	BP
GO:0042391	MF	regulation of membrane potential	231/7844	424/18493	2.8526e-07	2.18172e-05	1.62543e-05	BP
GO:0035637	MF	multicellular organismal signaling	108/7844	176/18493	2.88243e-07	2.18172e-05	1.62543e-05	BP
GO:0005814	MF	centriole	85/8443	133/19659	8.39609e-07	2.1494e-05	1.63503e-05	CC
GO:0042383	MF	sarcolemma	85/8443	133/19659	8.39609e-07	2.1494e-05	1.63503e-05	CC
GO:0000922	MF	spindle pole	96/8443	154/19659	9.1193e-07	2.25923e-05	1.71858e-05	CC
GO:0007215	MF	glutamate receptor signaling pathway	62/7844	90/18493	3.35244e-07	2.50763e-05	1.86824e-05	BP
GO:0010721	MF	negative regulation of cell development	183/7844	326/18493	3.44869e-07	2.54963e-05	1.89952e-05	BP
GO:0007626	MF	locomotory behavior	117/7844	194/18493	3.51091e-07	2.56579e-05	1.91157e-05	BP
GO:0007059	MF	chromosome segregation	176/7844	312/18493	3.70109e-07	2.67403e-05	1.99221e-05	BP
GO:0051961	MF	negative regulation of nervous system development	169/7844	298/18493	3.92992e-07	2.80747e-05	2.09162e-05	BP
GO:0060562	MF	epithelial tube morphogenesis	176/7844	313/18493	4.9336e-07	3.48531e-05	2.59663e-05	BP
GO:0044447	MF	axoneme part	29/8443	35/19659	1.45556e-06	3.49335e-05	2.65736e-05	CC
GO:0003012	MF	muscle system process	245/7844	456/18493	5.63145e-07	3.93459e-05	2.93135e-05	BP
GO:0001101	MF	response to acid chemical	185/7844	332/18493	5.87943e-07	4.02877e-05	3.00152e-05	BP
GO:1902105	MF	regulation of leukocyte differentiation	152/7844	265/18493	5.89298e-07	4.02877e-05	3.00152e-05	BP
GO:0031093	MF	platelet alpha granule lumen	48/8443	67/19659	1.82657e-06	4.18166e-05	3.18095e-05	CC
GO:0005604	MF	basement membrane	62/8443	92/19659	1.85126e-06	4.18166e-05	3.18095e-05	CC
GO:0006816	MF	calcium ion transport	224/7844	413/18493	6.7427e-07	4.56064e-05	3.39778e-05	BP
GO:2000177	MF	regulation of neural precursor cell proliferation	58/7844	84/18493	7.07292e-07	4.73364e-05	3.52666e-05	BP
GO:0030203	MF	glycosaminoglycan metabolic process	97/7844	157/18493	7.28944e-07	4.79104e-05	3.56942e-05	BP
GO:0045143	MF	homologous chromosome segregation	42/7844	56/18493	7.30938e-07	4.79104e-05	3.56942e-05	BP
GO:0061564	MF	axon development	262/7844	493/18493	7.64441e-07	4.9271e-05	3.67079e-05	BP
GO:0007129	MF	synapsis	36/7844	46/18493	7.67195e-07	4.9271e-05	3.67079e-05	BP
GO:0032944	MF	regulation of mononuclear cell proliferation	122/7844	206/18493	7.83475e-07	4.98133e-05	3.7112e-05	BP
GO:0043583	MF	ear development	124/7844	210/18493	7.96119e-07	5.01161e-05	3.73375e-05	BP
GO:0097485	MF	neuron projection guidance	149/7844	260/18493	8.14315e-07	5.0759e-05	3.78165e-05	BP
GO:0006022	MF	aminoglycan metabolic process	102/7844	167/18493	8.36003e-07	5.16049e-05	3.84468e-05	BP
GO:0007339	MF	binding of sperm to zona pellucida	31/7844	38/18493	8.71057e-07	5.32517e-05	3.96737e-05	BP
GO:0032589	MF	neuron projection membrane	42/8443	57/19659	2.42775e-06	5.32719e-05	4.05234e-05	CC
GO:0014706	MF	striated muscle tissue development	207/7844	379/18493	9.1883e-07	5.56374e-05	4.1451e-05	BP
GO:0003206	MF	cardiac chamber morphogenesis	82/7844	129/18493	9.77919e-07	5.82722e-05	4.3414e-05	BP
GO:0031589	MF	cell-substrate adhesion	187/7844	338/18493	9.80675e-07	5.82722e-05	4.3414e-05	BP
GO:0044272	MF	sulfur compound biosynthetic process	112/7844	187/18493	1.0084e-06	5.9365e-05	4.42281e-05	BP
GO:0048565	MF	digestive tract development	83/7844	131/18493	1.02651e-06	5.98768e-05	4.46095e-05	BP
GO:0050768	MF	negative regulation of neurogenesis	158/7844	279/18493	1.04103e-06	6.01717e-05	4.48291e-05	BP
GO:0050670	MF	regulation of lymphocyte proliferation	121/7844	205/18493	1.10724e-06	6.28353e-05	4.68136e-05	BP
GO:0007411	MF	axon guidance	148/7844	259/18493	1.11394e-06	6.28353e-05	4.68136e-05	BP
GO:0050953	MF	sensory perception of light stimulus	125/7844	213/18493	1.13378e-06	6.28353e-05	4.68136e-05	BP
GO:0090596	MF	sensory organ morphogenesis	144/7844	251/18493	1.13467e-06	6.28353e-05	4.68136e-05	BP
GO:0090066	MF	regulation of anatomical structure size	263/7844	497/18493	1.1491e-06	6.28353e-05	4.68136e-05	BP
GO:0001666	MF	response to hypoxia	175/7844	314/18493	1.15546e-06	6.28353e-05	4.68136e-05	BP
GO:0060560	MF	developmental growth involved in morphogenesis	132/7844	227/18493	1.1563e-06	6.28353e-05	4.68136e-05	BP
GO:0031091	MF	platelet alpha granule	61/8443	91/19659	2.93689e-06	6.26536e-05	4.766e-05	CC
GO:0005911	MF	cell-cell junction	237/8443	442/19659	3.2447e-06	6.73494e-05	5.12321e-05	CC
GO:0005819	MF	spindle	184/8443	333/19659	3.51478e-06	6.98958e-05	5.31691e-05	CC
GO:0031225	MF	anchored component of membrane	102/8443	169/19659	3.62247e-06	6.98958e-05	5.31691e-05	CC
GO:0097228	MF	sperm principal piece	20/8443	22/19659	3.64041e-06	6.98958e-05	5.31691e-05	CC
GO:0007141	MF	male meiosis I	21/7844	23/18493	1.33374e-06	7.18432e-05	5.35247e-05	BP
GO:0009855	MF	determination of bilateral symmetry	79/7844	124/18493	1.34466e-06	7.18432e-05	5.35247e-05	BP
GO:0061138	MF	morphogenesis of a branching epithelium	109/7844	182/18493	1.40415e-06	7.43963e-05	5.54268e-05	BP
GO:0060541	MF	respiratory system development	115/7844	194/18493	1.50352e-06	7.9003e-05	5.88589e-05	BP
GO:0048762	MF	mesenchymal cell differentiation	123/7844	210/18493	1.58227e-06	8.22115e-05	6.12493e-05	BP
GO:0032412	MF	regulation of ion transmembrane transporter activity	137/7844	238/18493	1.59044e-06	8.22115e-05	6.12493e-05	BP
GO:0046873	MF	metal ion transmembrane transporter activity	249/7872	444/17632	6.38193e-07	7.35713e-05	6.46439e-05	MF
GO:0005244	MF	voltage-gated ion channel activity	123/7872	199/17632	7.36941e-07	7.35713e-05	6.46439e-05	MF
GO:0022832	MF	voltage-gated channel activity	123/7872	199/17632	7.36941e-07	7.35713e-05	6.46439e-05	MF
GO:2000179	MF	positive regulation of neural precursor cell proliferation	39/7844	52/18493	1.82688e-06	9.33973e-05	6.95829e-05	BP
GO:0030324	MF	lung development	102/7844	169/18493	1.83622e-06	9.33973e-05	6.95829e-05	BP
GO:2000241	MF	regulation of reproductive process	88/7844	142/18493	1.94992e-06	9.69871e-05	7.22574e-05	BP
GO:0021700	MF	developmental maturation	153/7844	271/18493	1.95235e-06	9.69871e-05	7.22574e-05	BP
GO:0048704	MF	embryonic skeletal system morphogenesis	62/7844	93/18493	1.95652e-06	9.69871e-05	7.22574e-05	BP
GO:0007409	MF	axonogenesis	239/7844	449/18493	1.96781e-06	9.69871e-05	7.22574e-05	BP
GO:0001539	MF	cilium or flagellum-dependent cell motility	28/7844	34/18493	2.09914e-06	0.000101579	7.56787e-05	BP
GO:0060285	MF	cilium-dependent cell motility	28/7844	34/18493	2.09914e-06	0.000101579	7.56787e-05	BP
GO:0009799	MF	specification of symmetry	79/7844	125/18493	2.14087e-06	0.000101579	7.56787e-05	BP
GO:0030326	MF	embryonic limb morphogenesis	79/7844	125/18493	2.14087e-06	0.000101579	7.56787e-05	BP
GO:0035113	MF	embryonic appendage morphogenesis	79/7844	125/18493	2.14087e-06	0.000101579	7.56787e-05	BP
GO:0007601	MF	visual perception	122/7844	209/18493	2.21207e-06	0.00010418	7.76165e-05	BP
GO:0021782	MF	glial cell development	64/7844	97/18493	2.31627e-06	0.000108286	8.06752e-05	BP
GO:0036293	MF	response to decreased oxygen levels	179/7844	325/18493	2.4314e-06	0.000112667	8.39393e-05	BP
GO:0030193	MF	regulation of blood coagulation	53/7844	77/18493	2.46315e-06	0.000112667	8.39393e-05	BP
GO:1900046	MF	regulation of hemostasis	53/7844	77/18493	2.46315e-06	0.000112667	8.39393e-05	BP
GO:0002761	MF	regulation of myeloid leukocyte differentiation	73/7844	114/18493	2.53566e-06	0.000115155	8.57931e-05	BP
GO:0043650	MF	dicarboxylic acid biosynthetic process	15/7844	15/18493	2.56805e-06	0.000115799	8.62725e-05	BP
GO:0007368	MF	determination of left/right symmetry	74/7844	116/18493	2.67506e-06	0.000119775	8.92349e-05	BP
GO:0001889	MF	liver development	85/7844	137/18493	2.70675e-06	0.000120346	8.96606e-05	BP
GO:0043025	MF	neuronal cell body	255/8443	483/19659	6.62304e-06	0.000124061	9.43719e-05	CC
GO:0022612	MF	gland morphogenesis	76/7844	120/18493	2.95316e-06	0.000129785	9.66926e-05	BP
GO:0031099	MF	regeneration	111/7844	188/18493	2.95987e-06	0.000129785	9.66926e-05	BP
GO:0034764	MF	positive regulation of transmembrane transport	113/7844	192/18493	2.99904e-06	0.000130602	9.73011e-05	BP
GO:0001763	MF	morphogenesis of a branching structure	115/7844	196/18493	3.03062e-06	0.000130732	9.73978e-05	BP
GO:0060343	MF	trabecula formation	22/7844	25/18493	3.05175e-06	0.000130732	9.73978e-05	BP
GO:0071229	MF	cellular response to acid chemical	120/7844	206/18493	3.07806e-06	0.000130732	9.73978e-05	BP
GO:0070663	MF	regulation of leukocyte proliferation	125/7844	216/18493	3.08426e-06	0.000130732	9.73978e-05	BP
GO:0003774	MF	motor activity	89/7872	137/17632	1.22569e-06	0.000112952	9.9246e-05	MF
GO:0007517	MF	muscle organ development	216/7844	403/18493	3.22339e-06	0.000135724	0.000101117	BP
GO:0070482	MF	response to oxygen levels	190/7844	349/18493	3.34605e-06	0.000139962	0.000104274	BP
GO:0030323	MF	respiratory tube development	103/7844	173/18493	3.93834e-06	0.00016366	0.00012193	BP
GO:0034109	MF	homotypic cell-cell adhesion	52/7844	76/18493	4.04137e-06	0.000166851	0.000124307	BP
GO:0051480	MF	regulation of cytosolic calcium ion concentration	190/7844	350/18493	4.27104e-06	0.000175195	0.000130524	BP
GO:0099568	MF	cytoplasmic region	252/8443	479/19659	1.04606e-05	0.00019128	0.000145505	CC
GO:0006024	MF	glycosaminoglycan biosynthetic process	68/7844	106/18493	5.04374e-06	0.000205565	0.00015315	BP
GO:0031644	MF	regulation of neurological system process	79/7844	127/18493	5.21543e-06	0.000211208	0.000157354	BP
GO:0005261	MF	cation channel activity	184/7872	320/17632	2.16181e-06	0.000184989	0.000162542	MF
GO:0010001	MF	glial cell differentiation	113/7844	194/18493	5.92541e-06	0.000238442	0.000177644	BP
GO:0002063	MF	chondrocyte development	34/7844	45/18493	6.39067e-06	0.000255546	0.000190387	BP
GO:0010038	MF	response to metal ion	193/7844	358/18493	6.49271e-06	0.000258004	0.000192218	BP
GO:0010975	MF	regulation of neuron projection development	250/7844	478/18493	6.60911e-06	0.000260998	0.000194449	BP
GO:0046660	MF	female sex differentiation	74/7844	118/18493	6.7122e-06	0.000263433	0.000196263	BP
GO:0022409	MF	positive regulation of cell-cell adhesion	141/7844	251/18493	6.94902e-06	0.000271054	0.000201941	BP
GO:0022898	MF	regulation of transmembrane transporter activity	138/7844	245/18493	7.16412e-06	0.000277741	0.000206923	BP
GO:0071695	MF	anatomical structure maturation	93/7844	155/18493	7.26854e-06	0.000280081	0.000208666	BP
GO:0051899	MF	membrane depolarization	59/7844	90/18493	7.73603e-06	0.000296299	0.000220749	BP
GO:0097730	MF	non-motile cilium	86/8443	142/19659	1.6888e-05	0.000295987	0.000225154	CC
GO:0099055	MF	integral component of postsynaptic membrane	73/8443	117/19659	1.69576e-05	0.000295987	0.000225154	CC
GO:0048839	MF	inner ear development	107/7844	183/18493	8.17588e-06	0.000310409	0.000231261	BP
GO:0015711	MF	organic anion transport	241/7844	460/18493	8.20207e-06	0.000310409	0.000231261	BP
GO:0001077	MF	proximal promoter DNA-binding transcription activator activity, RNA polymerase II-specific	172/7872	298/17632	3.33693e-06	0.000266509	0.000234171	MF
GO:0045177	MF	apical part of cell	200/8443	373/19659	1.83631e-05	0.000313397	0.000238398	CC
GO:0099699	MF	integral component of synaptic membrane	92/8443	154/19659	1.89646e-05	0.000316626	0.000240855	CC
GO:0070206	MF	protein trimerization	39/7844	54/18493	8.67801e-06	0.000326478	0.000243233	BP
GO:0032409	MF	regulation of transporter activity	145/7844	260/18493	8.78178e-06	0.000328439	0.000244694	BP
GO:0050840	MF	extracellular matrix binding	42/7872	56/17632	3.73416e-06	0.000279595	0.000245668	MF
GO:0061008	MF	hepaticobiliary system development	85/7844	140/18493	9.28426e-06	0.000345201	0.000257182	BP
GO:0051235	MF	maintenance of location	173/7844	318/18493	9.51232e-06	0.000351624	0.000261967	BP
GO:0018108	MF	peptidyl-tyrosine phosphorylation	206/7844	387/18493	9.76412e-06	0.000358846	0.000267347	BP
GO:0006790	MF	sulfur compound metabolic process	194/7844	362/18493	1.00955e-05	0.000368891	0.000274831	BP
GO:0032838	MF	plasma membrane bounded cell projection cytoplasm	113/8443	196/19659	2.23189e-05	0.0003647	0.000277424	CC
GO:0007160	MF	cell-matrix adhesion	126/7844	222/18493	1.0661e-05	0.00038733	0.000288569	BP
GO:0060348	MF	bone development	119/7844	208/18493	1.11378e-05	0.000402352	0.000299761	BP
GO:0009612	MF	response to mechanical stimulus	117/7844	204/18493	1.12386e-05	0.0004037	0.000300765	BP
GO:0007094	MF	mitotic spindle assembly checkpoint	27/7844	34/18493	1.18501e-05	0.000414953	0.000309149	BP
GO:0031577	MF	spindle checkpoint	27/7844	34/18493	1.18501e-05	0.000414953	0.000309149	BP
GO:0071173	MF	spindle assembly checkpoint	27/7844	34/18493	1.18501e-05	0.000414953	0.000309149	BP
GO:0071174	MF	mitotic spindle checkpoint	27/7844	34/18493	1.18501e-05	0.000414953	0.000309149	BP
GO:0018212	MF	peptidyl-tyrosine modification	207/7844	390/18493	1.18782e-05	0.000414953	0.000309149	BP
GO:0022407	MF	regulation of cell-cell adhesion	206/7844	388/18493	1.21458e-05	0.000421983	0.000314386	BP
GO:0003777	MF	microtubule motor activity	58/7872	84/17632	5.20189e-06	0.000366581	0.000322099	MF
GO:0005891	MF	voltage-gated calcium channel complex	32/8443	43/19659	2.78637e-05	0.000445819	0.00033913	CC
GO:0031256	MF	leading edge membrane	98/8443	167/19659	2.88382e-05	0.000451994	0.000343828	CC
GO:0005858	MF	axonemal dynein complex	15/8443	16/19659	2.96215e-05	0.000454986	0.000346103	CC
GO:0050863	MF	regulation of T cell activation	166/7844	305/18493	1.38083e-05	0.000477136	0.000355476	BP
GO:0048592	MF	eye morphogenesis	87/7844	145/18493	1.41368e-05	0.000482069	0.000359152	BP
GO:1903169	MF	regulation of calcium ion transmembrane transport	87/7844	145/18493	1.41368e-05	0.000482069	0.000359152	BP
GO:0030900	MF	forebrain development	199/7844	374/18493	1.41785e-05	0.000482069	0.000359152	BP
GO:0001894	MF	tissue homeostasis	125/7844	221/18493	1.44542e-05	0.000485984	0.000362068	BP
GO:0061512	MF	protein localization to cilium	34/7844	46/18493	1.44996e-05	0.000485984	0.000362068	BP
GO:0001764	MF	neuron migration	89/7844	149/18493	1.4523e-05	0.000485984	0.000362068	BP
GO:0019838	MF	growth factor binding	87/7872	137/17632	6.39088e-06	0.000419304	0.000368425	MF
GO:0005178	MF	integrin binding	81/7872	126/17632	6.65007e-06	0.000419304	0.000368425	MF
GO:0010811	MF	positive regulation of cell-substrate adhesion	73/7844	118/18493	1.54596e-05	0.000512658	0.000381941	BP
GO:0002573	MF	myeloid leukocyte differentiation	113/7844	197/18493	1.56162e-05	0.000512658	0.000381941	BP
GO:0003205	MF	cardiac chamber development	98/7844	167/18493	1.56426e-05	0.000512658	0.000381941	BP
GO:0007156	MF	homophilic cell adhesion via plasma membrane adhesion molecules	98/7844	167/18493	1.56426e-05	0.000512658	0.000381941	BP
GO:0005516	MF	calmodulin binding	116/7872	192/17632	7.30638e-06	0.000437652	0.000384546	MF
GO:0008217	MF	regulation of blood pressure	103/7844	177/18493	1.58645e-05	0.000517264	0.000385372	BP
GO:0032982	MF	myosin filament	19/8443	22/19659	3.37226e-05	0.000507822	0.000386296	CC
GO:0048872	MF	homeostasis of number of cells	138/7844	248/18493	1.66343e-05	0.000539595	0.000402009	BP
GO:0003779	MF	actin binding	232/7872	421/17632	8.343e-06	0.000475948	0.000418195	MF
GO:0044449	MF	contractile fiber part	121/8443	214/19659	3.97667e-05	0.000587323	0.000446771	CC
GO:0098858	MF	actin-based cell projection	113/8443	198/19659	4.09894e-05	0.000593959	0.000451819	CC
GO:0019955	MF	cytokine binding	80/7872	125/17632	9.69176e-06	0.000527761	0.000463721	MF
GO:0072073	MF	kidney epithelium development	84/7844	140/18493	1.97253e-05	0.000636617	0.000474293	BP
GO:2000243	MF	positive regulation of reproductive process	45/7844	66/18493	2.05269e-05	0.00065914	0.000491073	BP
GO:0006023	MF	aminoglycan biosynthetic process	69/7844	111/18493	2.08155e-05	0.00066505	0.000495476	BP
GO:0007340	MF	acrosome reaction	26/7844	33/18493	2.23906e-05	0.000711797	0.000530303	BP
GO:0043292	MF	contractile fiber	128/8443	229/19659	5.00103e-05	0.000711257	0.000541047	CC
GO:0000982	MF	transcription factor activity, RNA polymerase II proximal promoter sequence-specific DNA binding	244/7872	447/17632	1.22676e-05	0.000638982	0.000561446	MF
GO:0072503	MF	cellular divalent inorganic cation homeostasis	249/7844	483/18493	2.6004e-05	0.000822554	0.00061282	BP
GO:0098936	MF	intrinsic component of postsynaptic membrane	74/8443	122/19659	5.92335e-05	0.000827116	0.000629179	CC
GO:0032946	MF	positive regulation of mononuclear cell proliferation	80/7844	133/18493	2.71217e-05	0.000853662	0.000635996	BP
GO:0003208	MF	cardiac ventricle morphogenesis	48/7844	72/18493	2.76246e-05	0.000865209	0.000644599	BP
GO:0021510	MF	spinal cord development	65/7844	104/18493	2.79179e-05	0.000870109	0.000648249	BP
GO:0051783	MF	regulation of nuclear division	114/7844	201/18493	2.85957e-05	0.000882908	0.000657784	BP
GO:0030879	MF	mammary gland development	84/7844	141/18493	2.86063e-05	0.000882908	0.000657784	BP
GO:1905819	MF	negative regulation of chromosome separation	30/7844	40/18493	2.89827e-05	0.000890201	0.000663219	BP
GO:0070588	MF	calcium ion transmembrane transport	163/7844	302/18493	3.01246e-05	0.000920829	0.000686037	BP
GO:1903510	MF	mucopolysaccharide metabolic process	68/7844	110/18493	3.09102e-05	0.000940321	0.000700559	BP
GO:0030016	MF	myofibril	122/8443	218/19659	6.89422e-05	0.000942202	0.000716724	CC
GO:0043186	MF	P granule	16/8443	18/19659	7.23827e-05	0.000942202	0.000716724	CC
GO:0045495	MF	pole plasm	16/8443	18/19659	7.23827e-05	0.000942202	0.000716724	CC
GO:0060293	MF	germ plasm	16/8443	18/19659	7.23827e-05	0.000942202	0.000716724	CC
GO:0099240	MF	intrinsic component of synaptic membrane	96/8443	166/19659	7.5826e-05	0.000970573	0.000738306	CC
GO:0006874	MF	cellular calcium ion homeostasis	232/7844	448/18493	3.306e-05	0.00100093	0.000745715	BP
GO:0051928	MF	positive regulation of calcium ion transport	71/7844	116/18493	3.35845e-05	0.00101199	0.000753954	BP
GO:0055074	MF	calcium ion homeostasis	238/7844	461/18493	3.43216e-05	0.00102932	0.000766868	BP
GO:0048638	MF	regulation of developmental growth	178/7844	334/18493	3.48542e-05	0.00104039	0.000775112	BP
GO:0031100	MF	animal organ regeneration	51/7844	78/18493	3.50184e-05	0.00104041	0.000775123	BP
GO:0042445	MF	hormone metabolic process	122/7844	218/18493	3.53088e-05	0.00104416	0.000777917	BP
GO:0097711	MF	ciliary basal body-plasma membrane docking	60/7844	95/18493	3.57019e-05	0.00104652	0.000779681	BP
GO:0000075	MF	cell cycle checkpoint	121/7844	216/18493	3.5718e-05	0.00104652	0.000779681	BP
GO:1903039	MF	positive regulation of leukocyte cell-cell adhesion	120/7844	214/18493	3.61222e-05	0.00105351	0.000784887	BP
GO:0035272	MF	exocrine system development	35/7844	49/18493	3.70019e-05	0.00107424	0.000800331	BP
GO:0042476	MF	odontogenesis	76/7844	126/18493	3.72613e-05	0.00107685	0.000802277	BP
GO:0050671	MF	positive regulation of lymphocyte proliferation	79/7844	132/18493	3.89839e-05	0.00112154	0.000835569	BP
GO:0071900	MF	regulation of protein serine/threonine kinase activity	254/7844	496/18493	3.93995e-05	0.00112839	0.000840672	BP
GO:0072006	MF	nephron development	81/7844	136/18493	3.9933e-05	0.00112884	0.000841011	BP
GO:1904064	MF	positive regulation of cation transmembrane transport	81/7844	136/18493	3.9933e-05	0.00112884	0.000841011	BP
GO:0050818	MF	regulation of coagulation	53/7844	82/18493	3.9948e-05	0.00112884	0.000841011	BP
GO:1902100	MF	negative regulation of metaphase/anaphase transition of cell cycle	28/7844	37/18493	4.06646e-05	0.00114401	0.000852309	BP
GO:0000793	MF	condensed chromosome	123/8443	221/19659	8.93903e-05	0.00112544	0.000856111	CC
GO:0050866	MF	negative regulation of cell activation	105/7844	184/18493	4.11504e-05	0.00115257	0.000858692	BP
GO:0034767	MF	positive regulation of ion transmembrane transport	87/7844	148/18493	4.18706e-05	0.00116602	0.000868705	BP
GO:0009954	MF	proximal/distal pattern formation	25/7844	32/18493	4.19971e-05	0.00116602	0.000868705	BP
GO:0044853	MF	plasma membrane raft	63/8443	102/19659	9.65007e-05	0.00118306	0.000899946	CC
GO:0005902	MF	microvillus	53/8443	83/19659	9.70483e-05	0.00118306	0.000899946	CC
GO:0048871	MF	multicellular organismal homeostasis	242/7844	471/18493	4.47749e-05	0.00123251	0.000918245	BP
GO:0006029	MF	proteoglycan metabolic process	55/7844	86/18493	4.47797e-05	0.00123251	0.000918245	BP
GO:0016324	MF	apical plasma membrane	165/8443	308/19659	0.000100684	0.00120821	0.000919074	CC
GO:0015629	MF	actin cytoskeleton	248/8443	483/19659	0.000103539	0.00122336	0.000930596	CC
GO:0060349	MF	bone morphogenesis	68/7844	111/18493	4.68739e-05	0.00128459	0.000957044	BP
GO:0015631	MF	tubulin binding	182/7872	325/17632	2.2032e-05	0.00109976	0.000966317	MF
GO:0045071	MF	negative regulation of viral genome replication	37/7844	53/18493	5.00604e-05	0.00136603	0.00101772	BP
GO:0007178	MF	transmembrane receptor protein serine/threonine kinase signaling pathway	180/7844	340/18493	5.15469e-05	0.00140058	0.00104346	BP
GO:2000816	MF	negative regulation of mitotic sister chromatid separation	29/7844	39/18493	5.18153e-05	0.00140188	0.00104443	BP
GO:1903708	MF	positive regulation of hemopoiesis	104/7844	183/18493	5.61349e-05	0.00150493	0.0011212	BP
GO:0046640	MF	regulation of alpha-beta T cell proliferation	23/7844	29/18493	5.63429e-05	0.00150493	0.0011212	BP
GO:0001837	MF	epithelial to mesenchymal transition	80/7844	135/18493	5.68517e-05	0.00150493	0.0011212	BP
GO:0051047	MF	positive regulation of secretion	210/7844	404/18493	5.70302e-05	0.00150493	0.0011212	BP
GO:0046883	MF	regulation of hormone secretion	142/7844	261/18493	5.71401e-05	0.00150493	0.0011212	BP
GO:0007088	MF	regulation of mitotic nuclear division	101/7844	177/18493	5.7254e-05	0.00150493	0.0011212	BP
GO:0007204	MF	positive regulation of cytosolic calcium ion concentration	165/7844	309/18493	5.76633e-05	0.00150493	0.0011212	BP
GO:0070665	MF	positive regulation of leukocyte proliferation	82/7844	139/18493	5.77173e-05	0.00150493	0.0011212	BP
GO:0042110	MF	T cell activation	232/7844	451/18493	5.77545e-05	0.00150493	0.0011212	BP
GO:0099177	MF	regulation of trans-synaptic signaling	217/7844	419/18493	5.80842e-05	0.00150734	0.001123	BP
GO:0061351	MF	neural precursor cell proliferation	84/7844	143/18493	5.83757e-05	0.00150875	0.00112405	BP
GO:0051260	MF	protein homooligomerization	174/7844	328/18493	5.90001e-05	0.00151679	0.00113004	BP
GO:0007588	MF	excretion	44/7844	66/18493	5.91638e-05	0.00151679	0.00113004	BP
GO:0048557	MF	embryonic digestive tract morphogenesis	16/7844	18/18493	6.02723e-05	0.00153405	0.0011429	BP
GO:0051091	MF	positive regulation of DNA-binding transcription factor activity	139/7844	255/18493	6.03195e-05	0.00153405	0.0011429	BP
GO:0030990	MF	intraciliary transport particle	22/8443	28/19659	0.000133133	0.00154919	0.00117845	CC
GO:1900449	MF	regulation of glutamate receptor signaling pathway	34/7844	48/18493	6.30717e-05	0.00159765	0.00119028	BP
GO:0098742	MF	cell-cell adhesion via plasma-membrane adhesion molecules	146/7844	270/18493	6.75446e-05	0.00170416	0.00126964	BP
GO:0032590	MF	dendrite membrane	29/8443	40/19659	0.000146408	0.00167822	0.00127661	CC
GO:1903037	MF	regulation of leukocyte cell-cell adhesion	157/7844	293/18493	6.83166e-05	0.00171683	0.00127907	BP
GO:0050870	MF	positive regulation of T cell activation	113/7844	202/18493	6.88354e-05	0.00172305	0.00128371	BP
GO:0014013	MF	regulation of gliogenesis	68/7844	112/18493	7.01099e-05	0.00174807	0.00130235	BP
GO:0002791	MF	regulation of peptide secretion	238/7844	465/18493	7.09792e-05	0.00176283	0.00131335	BP
GO:0048709	MF	oligodendrocyte differentiation	55/7844	87/18493	7.16922e-05	0.00177229	0.00132039	BP
GO:0050804	MF	modulation of chemical synaptic transmission	216/7844	418/18493	7.19174e-05	0.00177229	0.00132039	BP
GO:0045841	MF	negative regulation of mitotic metaphase/anaphase transition	27/7844	36/18493	7.33595e-05	0.00180085	0.00134167	BP
GO:0007159	MF	leukocyte cell-cell adhesion	173/7844	327/18493	7.4828e-05	0.00182983	0.00136326	BP
GO:0051090	MF	regulation of DNA-binding transcription factor activity	213/7844	412/18493	7.75375e-05	0.00188328	0.00140309	BP
GO:0061053	MF	somite development	57/7844	91/18493	7.79025e-05	0.00188328	0.00140309	BP
GO:1901570	MF	fatty acid derivative biosynthetic process	57/7844	91/18493	7.79025e-05	0.00188328	0.00140309	BP
GO:0006869	MF	lipid transport	188/7844	359/18493	7.98504e-05	0.00192306	0.00143272	BP
GO:0007093	MF	mitotic cell cycle checkpoint	95/7844	166/18493	8.05763e-05	0.0019252	0.00143431	BP
GO:0031960	MF	response to corticosteroid	95/7844	166/18493	8.05763e-05	0.0019252	0.00143431	BP
GO:0072080	MF	nephron tubule development	58/7844	93/18493	8.08474e-05	0.0019252	0.00143431	BP
GO:1901568	MF	fatty acid derivative metabolic process	92/7844	160/18493	8.16026e-05	0.00193593	0.00144231	BP
GO:0007605	MF	sensory perception of sound	83/7844	142/18493	8.19935e-05	0.00193797	0.00144383	BP
GO:0048754	MF	branching morphogenesis of an epithelial tube	87/7844	150/18493	8.23782e-05	0.00193986	0.00144523	BP
GO:0021537	MF	telencephalon development	135/7844	248/18493	8.30604e-05	0.0019487	0.00145182	BP
GO:0042073	MF	intraciliary transport	36/7844	52/18493	8.34503e-05	0.0019488	0.0014519	BP
GO:0061326	MF	renal tubule development	59/7844	95/18493	8.36776e-05	0.0019488	0.0014519	BP
GO:0007631	MF	feeding behavior	62/7844	101/18493	9.14367e-05	0.00210942	0.00157156	BP
GO:0032653	MF	regulation of interleukin-10 production	32/7844	45/18493	9.17384e-05	0.00210942	0.00157156	BP
GO:0051985	MF	negative regulation of chromosome segregation	32/7844	45/18493	9.17384e-05	0.00210942	0.00157156	BP
GO:0007431	MF	salivary gland development	28/7844	38/18493	9.19016e-05	0.00210942	0.00157156	BP
GO:0046545	MF	development of primary female sexual characteristics	63/7844	103/18493	9.37692e-05	0.00212503	0.00158319	BP
GO:0051983	MF	regulation of chromosome segregation	63/7844	103/18493	9.37692e-05	0.00212503	0.00158319	BP
GO:0070193	MF	synaptonemal complex organization	19/7844	23/18493	9.40717e-05	0.00212503	0.00158319	BP
GO:0006749	MF	glutathione metabolic process	37/7844	54/18493	9.41383e-05	0.00212503	0.00158319	BP
GO:0033627	MF	cell adhesion mediated by integrin	43/7844	65/18493	9.42528e-05	0.00212503	0.00158319	BP
GO:0032526	MF	response to retinoic acid	64/7844	105/18493	9.59719e-05	0.00215615	0.00160637	BP
GO:0005875	MF	microtubule associated complex	85/8443	147/19659	0.000191226	0.00215973	0.00164289	CC
GO:0072009	MF	nephron epithelium development	66/7844	109/18493	9.99849e-05	0.00223839	0.00166765	BP
GO:0000819	MF	sister chromatid segregation	104/7844	185/18493	0.000101159	0.00225673	0.00168131	BP
GO:0048663	MF	neuron fate commitment	44/7844	67/18493	0.000101791	0.00226288	0.00168589	BP
GO:0048738	MF	cardiac muscle tissue development	123/7844	224/18493	0.000102237	0.00226488	0.00168738	BP
GO:0042339	MF	keratan sulfate metabolic process	25/7844	33/18493	0.000103267	0.00227977	0.00169848	BP
GO:0015698	MF	inorganic anion transport	100/7844	177/18493	0.000105211	0.00231464	0.00172446	BP
GO:0000794	MF	condensed nuclear chromosome	61/8443	100/19659	0.000204189	0.00227271	0.00172883	CC
GO:0018146	MF	keratan sulfate biosynthetic process	22/7844	28/18493	0.000106427	0.00233332	0.00173837	BP
GO:0070167	MF	regulation of biomineral tissue development	54/7844	86/18493	0.000108371	0.00236778	0.00176405	BP
GO:0030500	MF	regulation of bone mineralization	45/7844	69/18493	0.000109257	0.00237895	0.00177237	BP
GO:0036128	MF	CatSper complex	10/8443	10/19659	0.00021283	0.00233505	0.00177625	CC
GO:0022604	MF	regulation of cell morphogenesis	241/7844	474/18493	0.00011061	0.00240019	0.00178819	BP
GO:0050954	MF	sensory perception of mechanical stimulus	92/7844	161/18493	0.000111633	0.00240875	0.00179457	BP
GO:0032355	MF	response to estradiol	75/7844	127/18493	0.000111762	0.00240875	0.00179457	BP
GO:0042129	MF	regulation of T cell proliferation	88/7844	153/18493	0.000113654	0.00241332	0.00179797	BP
GO:0007130	MF	synaptonemal complex assembly	17/7844	20/18493	0.000113923	0.00241332	0.00179797	BP
GO:0043046	MF	DNA methylation involved in gamete generation	17/7844	20/18493	0.000113923	0.00241332	0.00179797	BP
GO:0097503	MF	sialylation	17/7844	20/18493	0.000113923	0.00241332	0.00179797	BP
GO:0060402	MF	calcium ion transport into cytosol	86/7844	149/18493	0.00011428	0.00241332	0.00179797	BP
GO:0030534	MF	adult behavior	82/7844	141/18493	0.000114631	0.00241332	0.00179797	BP
GO:0060041	MF	retina development in camera-type eye	82/7844	141/18493	0.000114631	0.00241332	0.00179797	BP
GO:0046394	MF	carboxylic acid biosynthetic process	212/7844	412/18493	0.000115251	0.00241836	0.00180173	BP
GO:2000027	MF	regulation of animal organ morphogenesis	115/7844	208/18493	0.000115858	0.0024231	0.00180526	BP
GO:0060350	MF	endochondral bone morphogenesis	46/7844	71/18493	0.000116614	0.00243093	0.00181109	BP
GO:0097225	MF	sperm midpiece	18/8443	22/19659	0.000223898	0.00242188	0.0018423	CC
GO:0050769	MF	positive regulation of neurogenesis	231/7844	453/18493	0.000120756	0.00250904	0.00186929	BP
GO:0048546	MF	digestive tract morphogenesis	34/7844	49/18493	0.000122163	0.00253001	0.00188491	BP
GO:0097305	MF	response to alcohol	126/7844	231/18493	0.0001252	0.00258448	0.00192549	BP
GO:0007342	MF	fusion of sperm to egg plasma membrane involved in single fertilization	15/7844	17/18493	0.000127115	0.00259876	0.00193613	BP
GO:0036158	MF	outer dynein arm assembly	15/7844	17/18493	0.000127115	0.00259876	0.00193613	BP
GO:0051784	MF	negative regulation of nuclear division	40/7844	60/18493	0.000127118	0.00259876	0.00193613	BP
GO:0140014	MF	mitotic nuclear division	148/7844	277/18493	0.000130099	0.00265119	0.00197519	BP
GO:0008585	MF	female gonad development	60/7844	98/18493	0.000131132	0.0026576	0.00197997	BP
GO:0030501	MF	positive regulation of bone mineralization	26/7844	35/18493	0.00013125	0.0026576	0.00197997	BP
GO:1901214	MF	regulation of neuron death	157/7844	296/18493	0.000133203	0.00268423	0.0019998	BP
GO:0033048	MF	negative regulation of mitotic sister chromatid segregation	30/7844	42/18493	0.000133409	0.00268423	0.0019998	BP
GO:0005581	MF	collagen trimer	54/8443	87/19659	0.000247595	0.00264101	0.00200899	CC
GO:0071248	MF	cellular response to metal ion	103/7844	184/18493	0.000136031	0.00272835	0.00203268	BP
GO:0009314	MF	response to radiation	226/7844	443/18493	0.000137447	0.00272955	0.00203357	BP
GO:0021675	MF	nerve development	49/7844	77/18493	0.000137727	0.00272955	0.00203357	BP
GO:1903901	MF	negative regulation of viral life cycle	49/7844	77/18493	0.000137727	0.00272955	0.00203357	BP
GO:0046530	MF	photoreceptor cell differentiation	41/7844	62/18493	0.000138148	0.00272955	0.00203357	BP
GO:0016053	MF	organic acid biosynthetic process	212/7844	413/18493	0.000138238	0.00272955	0.00203357	BP
GO:0010543	MF	regulation of platelet activation	23/7844	30/18493	0.000144243	0.00283055	0.00210882	BP
GO:0050650	MF	chondroitin sulfate proteoglycan biosynthetic process	23/7844	30/18493	0.000144243	0.00283055	0.00210882	BP
GO:0045670	MF	regulation of osteoclast differentiation	42/7844	64/18493	0.00014908	0.00290752	0.00216617	BP
GO:0072091	MF	regulation of stem cell proliferation	42/7844	64/18493	0.00014908	0.00290752	0.00216617	BP
GO:0098644	MF	complex of collagen trimers	16/8443	19/19659	0.000274206	0.0028848	0.00219444	CC
GO:2001257	MF	regulation of cation channel activity	92/7844	162/18493	0.000151495	0.00294558	0.00219452	BP
GO:0045787	MF	positive regulation of cell cycle	201/7844	390/18493	0.000152322	0.00295263	0.00219977	BP
GO:0000768	MF	syncytium formation by plasma membrane fusion	36/7844	53/18493	0.000154158	0.00296114	0.00220611	BP
GO:0140253	MF	cell-cell fusion	36/7844	53/18493	0.000154158	0.00296114	0.00220611	BP
GO:1902099	MF	regulation of metaphase/anaphase transition of cell cycle	36/7844	53/18493	0.000154158	0.00296114	0.00220611	BP
GO:0033046	MF	negative regulation of sister chromatid segregation	31/7844	44/18493	0.00015582	0.00298404	0.00222317	BP
GO:0030168	MF	platelet activation	87/7844	152/18493	0.000156397	0.0029861	0.0022247	BP
GO:0003231	MF	cardiac ventricle development	74/7844	126/18493	0.000157913	0.00300602	0.00223954	BP
GO:1902107	MF	positive regulation of leukocyte differentiation	82/7844	142/18493	0.000159235	0.00301588	0.00224689	BP
GO:0097553	MF	calcium ion transmembrane import into cytosol	77/7844	132/18493	0.000159388	0.00301588	0.00224689	BP
GO:0006026	MF	aminoglycan catabolic process	43/7844	66/18493	0.000159854	0.00301588	0.00224689	BP
GO:0048863	MF	stem cell differentiation	110/7844	199/18493	0.000162943	0.00306058	0.0022802	BP
GO:0070997	MF	neuron death	175/7844	335/18493	0.000163186	0.00306058	0.0022802	BP
GO:0009914	MF	hormone transport	166/7844	316/18493	0.000165208	0.00307132	0.00228819	BP
GO:0015849	MF	organic acid transport	166/7844	316/18493	0.000165208	0.00307132	0.00228819	BP
GO:0046942	MF	carboxylic acid transport	166/7844	316/18493	0.000165208	0.00307132	0.00228819	BP
GO:0055013	MF	cardiac muscle cell development	54/7844	87/18493	0.000168391	0.00312138	0.00232549	BP
GO:0006949	MF	syncytium formation	37/7844	55/18493	0.000170385	0.00314915	0.00234618	BP
GO:0051304	MF	chromosome separation	55/7844	89/18493	0.000173717	0.00320142	0.00238513	BP
GO:0023061	MF	signal release	230/7844	453/18493	0.000174582	0.00320808	0.00239008	BP
GO:0000800	MF	lateral element	12/8443	13/19659	0.00030774	0.00319384	0.00242953	CC
GO:0010876	MF	lipid localization	202/7844	393/18493	0.00017843	0.00326933	0.00243572	BP
GO:0060351	MF	cartilage development involved in endochondral bone morphogenesis	32/7844	46/18493	0.000178972	0.00326984	0.0024361	BP
GO:0055006	MF	cardiac cell development	57/7844	93/18493	0.000183502	0.00333068	0.00248143	BP
GO:0007398	MF	ectoderm development	18/7844	22/18493	0.000184921	0.00333068	0.00248143	BP
GO:0045026	MF	plasma membrane fusion	18/7844	22/18493	0.000184921	0.00333068	0.00248143	BP
GO:1901685	MF	glutathione derivative metabolic process	18/7844	22/18493	0.000184921	0.00333068	0.00248143	BP
GO:1901687	MF	glutathione derivative biosynthetic process	18/7844	22/18493	0.000184921	0.00333068	0.00248143	BP
GO:0046879	MF	hormone secretion	161/7844	306/18493	0.00018584	0.00333776	0.0024867	BP
GO:0038063	MF	collagen-activated tyrosine kinase receptor signaling pathway	10/7844	10/18493	0.000187874	0.00335682	0.0025009	BP
GO:0051651	MF	maintenance of location in cell	58/7844	95/18493	0.000187956	0.00335682	0.0025009	BP
GO:0001756	MF	somitogenesis	46/7844	72/18493	0.000190725	0.00338724	0.00252356	BP
GO:0019226	MF	transmission of nerve impulse	46/7844	72/18493	0.000190725	0.00338724	0.00252356	BP
GO:0021953	MF	central nervous system neuron differentiation	98/7844	175/18493	0.00019139	0.00338957	0.0025253	BP
GO:0004364	MF	glutathione transferase activity	21/7872	25/17632	6.04143e-05	0.00289506	0.00254376	MF
GO:0014003	MF	oligodendrocyte development	28/7844	39/18493	0.000193939	0.0034157	0.00254477	BP
GO:2001222	MF	regulation of neuron migration	28/7844	39/18493	0.000193939	0.0034157	0.00254477	BP
GO:0007229	MF	integrin-mediated signaling pathway	60/7844	99/18493	0.000195988	0.00344225	0.00256454	BP
GO:0031233	MF	intrinsic component of external side of plasma membrane	19/8443	24/19659	0.000329622	0.00337533	0.00256758	CC
GO:0055078	MF	sodium ion homeostasis	33/7844	48/18493	0.000202611	0.00353902	0.00263664	BP
GO:0061383	MF	trabecula morphogenesis	33/7844	48/18493	0.000202611	0.00353902	0.00263664	BP
GO:0034704	MF	calcium channel complex	42/8443	65/19659	0.000344821	0.0034845	0.00265063	CC
GO:0005267	MF	potassium channel activity	77/7872	124/17632	6.58283e-05	0.00303317	0.00266511	MF
GO:0050806	MF	positive regulation of synaptic transmission	90/7844	159/18493	0.000207719	0.00361829	0.0026957	BP
GO:0050878	MF	regulation of body fluid levels	248/7844	493/18493	0.000209987	0.00364781	0.00271769	BP
GO:0061337	MF	cardiac conduction	66/7844	111/18493	0.000213289	0.00369506	0.0027529	BP
GO:0008344	MF	adult locomotory behavior	49/7844	78/18493	0.000218636	0.00377741	0.00281425	BP
GO:0033045	MF	regulation of sister chromatid segregation	50/7844	80/18493	0.000227158	0.00391247	0.00291487	BP
GO:0035136	MF	forelimb morphogenesis	29/7844	41/18493	0.000227684	0.00391247	0.00291487	BP
GO:0046641	MF	positive regulation of alpha-beta T cell proliferation	16/7844	19/18493	0.000230224	0.00394545	0.00293944	BP
GO:0032420	MF	stereocilium	31/8443	45/19659	0.000388794	0.00387784	0.00294984	CC
GO:0048566	MF	embryonic digestive tract development	25/7844	34/18493	0.000232768	0.00397713	0.00296304	BP
GO:0016049	MF	cell growth	244/7844	485/18493	0.000233323	0.00397713	0.00296304	BP
GO:0110110	MF	positive regulation of animal organ morphogenesis	51/7844	82/18493	0.000235262	0.00399946	0.00297968	BP
GO:0055072	MF	iron ion homeostasis	52/7844	84/18493	0.000242937	0.00411891	0.00306868	BP
GO:1901652	MF	response to peptide	242/7844	481/18493	0.000245947	0.00415723	0.00309722	BP
GO:1901987	MF	regulation of cell cycle phase transition	210/7844	412/18493	0.000247547	0.00415723	0.00309722	BP
GO:0043405	MF	regulation of MAP kinase activity	174/7844	335/18493	0.000247916	0.00415723	0.00309722	BP
GO:0032535	MF	regulation of cellular component size	189/7844	367/18493	0.000248356	0.00415723	0.00309722	BP
GO:1904888	MF	cranial skeletal system development	42/7844	65/18493	0.0002492	0.00415723	0.00309722	BP
GO:2001259	MF	positive regulation of cation channel activity	42/7844	65/18493	0.0002492	0.00415723	0.00309722	BP
GO:0031638	MF	zymogen activation	35/7844	52/18493	0.000250428	0.00415723	0.00309722	BP
GO:0045839	MF	negative regulation of mitotic nuclear division	35/7844	52/18493	0.000250428	0.00415723	0.00309722	BP
GO:0010717	MF	regulation of epithelial to mesenchymal transition	54/7844	88/18493	0.000256972	0.00424371	0.00316165	BP
GO:0048644	MF	muscle organ morphogenesis	54/7844	88/18493	0.000256972	0.00424371	0.00316165	BP
GO:0045165	MF	cell fate commitment	137/7844	257/18493	0.000258451	0.00425707	0.00317161	BP
GO:0004181	MF	metallocarboxypeptidase activity	24/7872	30/17632	8.14537e-05	0.00361413	0.00317558	MF
GO:0003197	MF	endocardial cushion development	30/7844	43/18493	0.000262415	0.00430009	0.00320366	BP
GO:0050654	MF	chondroitin sulfate proteoglycan metabolic process	30/7844	43/18493	0.000262415	0.00430009	0.00320366	BP
GO:0060333	MF	interferon-gamma-mediated signaling pathway	55/7844	90/18493	0.000263328	0.00430116	0.00320445	BP
GO:0003413	MF	chondrocyte differentiation involved in endochondral bone morphogenesis	22/7844	29/18493	0.000263833	0.00430116	0.00320445	BP
GO:0038065	MF	collagen-activated signaling pathway	12/7844	13/18493	0.000267106	0.00434338	0.00323591	BP
GO:0030863	MF	cortical cytoskeleton	61/8443	102/19659	0.000437028	0.0042797	0.00325553	CC
GO:0016323	MF	basolateral plasma membrane	116/8443	213/19659	0.000443544	0.0042797	0.00325553	CC
GO:0032809	MF	neuronal cell body membrane	20/8443	26/19659	0.000451375	0.0042797	0.00325553	CC
GO:0044298	MF	cell body membrane	20/8443	26/19659	0.000451375	0.0042797	0.00325553	CC
GO:0090025	MF	regulation of monocyte chemotaxis	19/7844	24/18493	0.000271146	0.00439782	0.00327647	BP
GO:0060993	MF	kidney morphogenesis	57/7844	94/18493	0.000274718	0.00444442	0.00331119	BP
GO:0071300	MF	cellular response to retinoic acid	44/7844	69/18493	0.000278057	0.00448701	0.00334292	BP
GO:1901385	MF	regulation of voltage-gated calcium channel activity	26/7844	36/18493	0.000281765	0.00453534	0.00337892	BP
GO:0046677	MF	response to antibiotic	168/7844	323/18493	0.000287508	0.0046161	0.00343909	BP
GO:0035265	MF	organ growth	107/7844	195/18493	0.000288785	0.00462492	0.00344567	BP
GO:0031214	MF	biomineral tissue development	85/7844	150/18493	0.000292106	0.00465885	0.00347094	BP
GO:0035282	MF	segmentation	61/7844	102/18493	0.000292369	0.00465885	0.00347094	BP
GO:0032943	MF	mononuclear cell proliferation	141/7844	266/18493	0.000294699	0.00468425	0.00348986	BP
GO:0044784	MF	metaphase/anaphase transition of cell cycle	37/7844	56/18493	0.000297644	0.00468531	0.00349065	BP
GO:0086065	MF	cell communication involved in cardiac conduction	37/7844	56/18493	0.000297644	0.00468531	0.00349065	BP
GO:0001754	MF	eye photoreceptor cell differentiation	31/7844	45/18493	0.000297714	0.00468531	0.00349065	BP
GO:0010463	MF	mesenchymal cell proliferation	31/7844	45/18493	0.000297714	0.00468531	0.00349065	BP
GO:0005788	MF	endoplasmic reticulum lumen	158/8443	301/19659	0.000492263	0.00461046	0.00350714	CC
GO:0071214	MF	cellular response to abiotic stimulus	166/7844	319/18493	0.00030202	0.00472967	0.0035237	BP
GO:0104004	MF	cellular response to environmental stimulus	166/7844	319/18493	0.00030202	0.00472967	0.0035237	BP
GO:0035270	MF	endocrine system development	74/7844	128/18493	0.000309783	0.00483932	0.00360539	BP
GO:0032421	MF	stereocilium bundle	34/8443	51/19659	0.000532817	0.00493017	0.00375033	CC
GO:0051146	MF	striated muscle cell differentiation	146/7844	277/18493	0.000325332	0.00506976	0.00377708	BP
GO:0031016	MF	pancreas development	48/7844	77/18493	0.000328853	0.00511209	0.00380862	BP
GO:0032613	MF	interleukin-10 production	32/7844	47/18493	0.0003332	0.00516703	0.00384955	BP
GO:1904645	MF	response to amyloid-beta	23/7844	31/18493	0.000334238	0.00517053	0.00385215	BP
GO:0008361	MF	regulation of cell size	97/7844	175/18493	0.000337537	0.00520888	0.00388073	BP
GO:1903532	MF	positive regulation of secretion by cell	191/7844	373/18493	0.000339279	0.00522309	0.00389131	BP
GO:0006027	MF	glycosaminoglycan catabolic process	40/7844	62/18493	0.000364664	0.00558682	0.0041623	BP
GO:1905818	MF	regulation of chromosome separation	40/7844	62/18493	0.000364664	0.00558682	0.0041623	BP
GO:0046456	MF	icosanoid biosynthetic process	33/7844	49/18493	0.000368535	0.00561906	0.00418632	BP
GO:0072132	MF	mesenchyme morphogenesis	33/7844	49/18493	0.000368535	0.00561906	0.00418632	BP
GO:0034705	MF	potassium channel complex	59/8443	99/19659	0.00061029	0.00551778	0.00419733	CC
GO:0098636	MF	protein complex involved in cell adhesion	25/8443	35/19659	0.000610692	0.00551778	0.00419733	CC
GO:0045216	MF	cell-cell junction organization	87/7844	155/18493	0.000384007	0.00583458	0.00434688	BP
GO:0071560	MF	cellular response to transforming growth factor beta stimulus	129/7844	242/18493	0.000384896	0.00583458	0.00434688	BP
GO:0060021	MF	roof of mouth development	54/7844	89/18493	0.000385424	0.00583458	0.00434688	BP
GO:0048525	MF	negative regulation of viral process	55/7844	91/18493	0.000392536	0.00590478	0.00439918	BP
GO:1904029	MF	regulation of cyclin-dependent protein kinase activity	55/7844	91/18493	0.000392536	0.00590478	0.00439918	BP
GO:1901654	MF	response to ketone	104/7844	190/18493	0.000392847	0.00590478	0.00439918	BP
GO:0051384	MF	response to glucocorticoid	84/7844	149/18493	0.000396414	0.00594433	0.00442865	BP
GO:0030071	MF	regulation of mitotic metaphase/anaphase transition	34/7844	51/18493	0.000403426	0.00603525	0.00449639	BP
GO:0015079	MF	potassium ion transmembrane transporter activity	95/7872	160/17632	0.000119611	0.00511766	0.00449667	MF
GO:0030316	MF	osteoclast differentiation	57/7844	95/18493	0.00040486	0.0060425	0.00450178	BP
GO:0003203	MF	endocardial cushion morphogenesis	24/7844	33/18493	0.000408969	0.00607529	0.00452621	BP
GO:0035115	MF	embryonic forelimb morphogenesis	24/7844	33/18493	0.000408969	0.00607529	0.00452621	BP
GO:0042102	MF	positive regulation of T cell proliferation	58/7844	97/18493	0.000410103	0.00607794	0.00452819	BP
GO:0060078	MF	regulation of postsynaptic membrane potential	79/7844	139/18493	0.000414275	0.0061255	0.00456362	BP
GO:0019199	MF	transmembrane receptor protein kinase activity	53/7872	81/17632	0.000127481	0.00526629	0.00462727	MF
GO:0001508	MF	action potential	76/7844	133/18493	0.000422729	0.00623599	0.00464594	BP
GO:0022843	MF	voltage-gated cation channel activity	86/7872	143/17632	0.000132607	0.00529545	0.00465289	MF
GO:0007224	MF	smoothened signaling pathway	74/7844	129/18493	0.000427174	0.00626777	0.00466962	BP
GO:0006821	MF	chloride transport	63/7844	107/18493	0.000427841	0.00626777	0.00466962	BP
GO:0071156	MF	regulation of cell cycle arrest	63/7844	107/18493	0.000427841	0.00626777	0.00466962	BP
GO:0034330	MF	cell junction organization	150/7844	287/18493	0.000446504	0.00652615	0.00486212	BP
GO:0071559	MF	response to transforming growth factor beta	132/7844	249/18493	0.000448887	0.00654592	0.00487685	BP
GO:0098656	MF	anion transmembrane transport	141/7844	268/18493	0.000451113	0.00656333	0.00488982	BP
GO:0050890	MF	cognition	149/7844	285/18493	0.000457458	0.00664045	0.00494727	BP
GO:0090026	MF	positive regulation of monocyte chemotaxis	15/7844	18/18493	0.000461326	0.00668135	0.00497774	BP
GO:0070661	MF	leukocyte proliferation	148/7844	283/18493	0.000468668	0.00675549	0.00503298	BP
GO:0050730	MF	regulation of peptidyl-tyrosine phosphorylation	130/7844	245/18493	0.000469633	0.00675549	0.00503298	BP
GO:0070374	MF	positive regulation of ERK1 and ERK2 cascade	130/7844	245/18493	0.000469633	0.00675549	0.00503298	BP
GO:1990939	MF	ATP-dependent microtubule motor activity	32/7872	44/17632	0.000148251	0.00572918	0.00503398	MF
GO:0046651	MF	lymphocyte proliferation	139/7844	264/18493	0.000472841	0.00677731	0.00504923	BP
GO:1903706	MF	regulation of hemopoiesis	211/7844	418/18493	0.000473281	0.00677731	0.00504923	BP
GO:0018200	MF	peptidyl-glutamic acid modification	21/7844	28/18493	0.000477961	0.00679838	0.00506494	BP
GO:0021602	MF	cranial nerve morphogenesis	21/7844	28/18493	0.000477961	0.00679838	0.00506494	BP
GO:1904646	MF	cellular response to amyloid-beta	21/7844	28/18493	0.000477961	0.00679838	0.00506494	BP
GO:1903522	MF	regulation of blood circulation	138/7844	262/18493	0.000484067	0.00686986	0.00511819	BP
GO:0007435	MF	salivary gland morphogenesis	25/7844	35/18493	0.000486564	0.00688992	0.00513313	BP
GO:0070169	MF	positive regulation of biomineral tissue development	30/7844	44/18493	0.000490834	0.00693494	0.00516668	BP
GO:0045926	MF	negative regulation of growth	137/7844	260/18493	0.000495539	0.0069677	0.00519108	BP
GO:1903034	MF	regulation of response to wounding	89/7844	160/18493	0.000496376	0.0069677	0.00519108	BP
GO:0007179	MF	transforming growth factor beta receptor signaling pathway	105/7844	193/18493	0.000496441	0.0069677	0.00519108	BP
GO:0010965	MF	regulation of mitotic sister chromatid separation	37/7844	57/18493	0.000503087	0.00703023	0.00523766	BP
GO:0015718	MF	monocarboxylic acid transport	88/7844	158/18493	0.000503107	0.00703023	0.00523766	BP
GO:0070371	MF	ERK1 and ERK2 cascade	175/7844	341/18493	0.000511897	0.00712292	0.00530672	BP
GO:0003433	MF	chondrocyte development involved in endochondral bone morphogenesis	18/7844	23/18493	0.000511981	0.00712292	0.00530672	BP
GO:0090092	MF	regulation of transmembrane receptor protein serine/threonine kinase signaling pathway	125/7844	235/18493	0.000525245	0.0072915	0.00543232	BP
GO:0030017	MF	sarcomere	107/8443	197/19659	0.000818654	0.00716974	0.00545395	CC
GO:0042611	MF	MHC protein complex	19/8443	25/19659	0.000819075	0.00716974	0.00545395	CC
GO:0030992	MF	intraciliary transport particle B	16/8443	20/19659	0.000821532	0.00716974	0.00545395	CC
GO:0035869	MF	ciliary transition zone	41/8443	65/19659	0.00083827	0.00717033	0.0054544	CC
GO:0043202	MF	lysosomal lumen	56/8443	94/19659	0.000840273	0.00717033	0.0054544	CC
GO:0060415	MF	muscle tissue morphogenesis	50/7844	82/18493	0.000530267	0.00734517	0.00547231	BP
GO:0021885	MF	forebrain cell migration	38/7844	59/18493	0.000534039	0.00738135	0.00549926	BP
GO:0002237	MF	response to molecule of bacterial origin	173/7844	337/18493	0.000538854	0.00743175	0.0055368	BP
GO:0098862	MF	cluster of actin-based cell projections	81/8443	144/19659	0.000863279	0.00728569	0.00554216	CC
GO:0050663	MF	cytokine secretion	113/7844	210/18493	0.000540591	0.00743957	0.00554263	BP
GO:0048806	MF	genitalia development	31/7844	46/18493	0.000543113	0.00745392	0.00555333	BP
GO:0003015	MF	heart process	133/7844	252/18493	0.000543979	0.00745392	0.00555333	BP
GO:0008509	MF	anion transmembrane transporter activity	180/7872	330/17632	0.000169528	0.00634669	0.00557656	MF
GO:0008305	MF	integrin complex	23/8443	32/19659	0.000878677	0.00733504	0.0055797	CC
GO:0097733	MF	photoreceptor cell cilium	63/8443	108/19659	0.000895113	0.0073919	0.00562295	CC
GO:0060347	MF	heart trabecula formation	13/7844	15/18493	0.0005536	0.0075532	0.00562729	BP
GO:0070365	MF	hepatocyte differentiation	13/7844	15/18493	0.0005536	0.0075532	0.00562729	BP
GO:0008328	MF	ionotropic glutamate receptor complex	34/8443	52/19659	0.000906838	0.00740906	0.005636	CC
GO:0042733	MF	embryonic digit morphogenesis	39/7844	61/18493	0.000563641	0.00766865	0.0057133	BP
GO:0060323	MF	head morphogenesis	26/7844	37/18493	0.000565706	0.00766865	0.0057133	BP
GO:2000648	MF	positive regulation of stem cell proliferation	26/7844	37/18493	0.000565706	0.00766865	0.0057133	BP
GO:0003073	MF	regulation of systemic arterial blood pressure	54/7844	90/18493	0.000568568	0.00766865	0.0057133	BP
GO:0050880	MF	regulation of blood vessel size	77/7844	136/18493	0.000569299	0.00766865	0.0057133	BP
GO:0055076	MF	transition metal ion homeostasis	77/7844	136/18493	0.000569299	0.00766865	0.0057133	BP
GO:0046631	MF	alpha-beta T cell activation	76/7844	134/18493	0.000574198	0.007702	0.00573815	BP
GO:0061041	MF	regulation of wound healing	76/7844	134/18493	0.000574198	0.007702	0.00573815	BP
GO:2001223	MF	negative regulation of neuron migration	11/7844	12/18493	0.000584327	0.00782137	0.00582708	BP
GO:0032414	MF	positive regulation of ion transmembrane transporter activity	57/7844	96/18493	0.000587697	0.00784996	0.00584838	BP
GO:0032733	MF	positive regulation of interleukin-10 production	22/7844	30/18493	0.000592706	0.00788374	0.00587355	BP
GO:1902692	MF	regulation of neuroblast proliferation	22/7844	30/18493	0.000592706	0.00788374	0.00587355	BP
GO:0010862	MF	positive regulation of pathway-restricted SMAD protein phosphorylation	32/7844	48/18493	0.000594376	0.00788945	0.0058778	BP
GO:0010522	MF	regulation of calcium ion transport into cytosol	59/7844	100/18493	0.000596328	0.00789131	0.00587919	BP
GO:1901605	MF	alpha-amino acid metabolic process	119/7844	223/18493	0.000599422	0.00789131	0.00587919	BP
GO:0051282	MF	regulation of sequestering of calcium ion	69/7844	120/18493	0.000599761	0.00789131	0.00587919	BP
GO:0051283	MF	negative regulation of sequestering of calcium ion	68/7844	118/18493	0.000601873	0.00789131	0.00587919	BP
GO:0030282	MF	bone mineralization	61/7844	104/18493	0.000601963	0.00789131	0.00587919	BP
GO:0032411	MF	positive regulation of transporter activity	61/7844	104/18493	0.000601963	0.00789131	0.00587919	BP
GO:0005871	MF	kinesin complex	35/8443	54/19659	0.000971003	0.00776802	0.00590906	CC
GO:0098878	MF	neurotransmitter receptor complex	35/8443	54/19659	0.000971003	0.00776802	0.00590906	CC
GO:0043901	MF	negative regulation of multi-organism process	93/7844	169/18493	0.000612009	0.00800648	0.005965	BP
GO:0030864	MF	cortical actin cytoskeleton	46/8443	75/19659	0.00100514	0.00795825	0.00605377	CC
GO:0001819	MF	positive regulation of cytokine production	212/7844	422/18493	0.000636514	0.00830997	0.0061911	BP
GO:0008016	MF	regulation of heart contraction	116/7844	217/18493	0.000639702	0.00831744	0.00619667	BP
GO:0045665	MF	negative regulation of neuron differentiation	116/7844	217/18493	0.000639702	0.00831744	0.00619667	BP
GO:0060425	MF	lung morphogenesis	33/7844	50/18493	0.000644248	0.00834914	0.00622028	BP
GO:0071902	MF	positive regulation of protein serine/threonine kinase activity	166/7844	323/18493	0.000644767	0.00834914	0.00622028	BP
GO:0044325	MF	ion channel binding	76/7872	125/17632	0.000195564	0.00709956	0.00623808	MF
GO:0015850	MF	organic hydroxy compound transport	134/7844	255/18493	0.000655706	0.00847354	0.00631296	BP
GO:0046658	MF	anchored component of plasma membrane	37/8443	58/19659	0.00109204	0.00855803	0.00651002	CC
GO:0030206	MF	chondroitin sulfate biosynthetic process	19/7844	25/18493	0.000679349	0.00874352	0.00651411	BP
GO:2000311	MF	regulation of AMPA receptor activity	19/7844	25/18493	0.000679349	0.00874352	0.00651411	BP
GO:0030195	MF	negative regulation of blood coagulation	34/7844	52/18493	0.000692423	0.00887585	0.0066127	BP
GO:1900047	MF	negative regulation of hemostasis	34/7844	52/18493	0.000692423	0.00887585	0.0066127	BP
GO:0006260	MF	DNA replication	140/7844	268/18493	0.000696354	0.00889165	0.00662447	BP
GO:1901990	MF	regulation of mitotic cell cycle phase transition	190/7844	375/18493	0.000696452	0.00889165	0.00662447	BP
GO:0014002	MF	astrocyte development	23/7844	32/18493	0.000711433	0.00897478	0.0066864	BP
GO:0021522	MF	spinal cord motor neuron differentiation	23/7844	32/18493	0.000711433	0.00897478	0.0066864	BP
GO:0046633	MF	alpha-beta T cell proliferation	23/7844	32/18493	0.000711433	0.00897478	0.0066864	BP
GO:0060317	MF	cardiac epithelial to mesenchymal transition	23/7844	32/18493	0.000711433	0.00897478	0.0066864	BP
GO:0061036	MF	positive regulation of cartilage development	23/7844	32/18493	0.000711433	0.00897478	0.0066864	BP
GO:0070207	MF	protein homotrimerization	23/7844	32/18493	0.000711433	0.00897478	0.0066864	BP
GO:0002080	MF	acrosomal membrane	17/8443	22/19659	0.0011349	0.00880406	0.00669717	CC
GO:0030902	MF	hindbrain development	82/7844	147/18493	0.000719627	0.00906017	0.00675002	BP
GO:0050708	MF	regulation of protein secretion	219/7844	438/18493	0.00072337	0.00908143	0.00676585	BP
GO:0072210	MF	metanephric nephron development	28/7844	41/18493	0.000724172	0.00908143	0.00676585	BP
GO:0048588	MF	developmental cell growth	120/7844	226/18493	0.000732595	0.00916897	0.00683108	BP
GO:0042098	MF	T cell proliferation	97/7844	178/18493	0.000738331	0.00917259	0.00683377	BP
GO:0003229	MF	ventricular cardiac muscle tissue development	35/7844	54/18493	0.000738655	0.00917259	0.00683377	BP
GO:0007091	MF	metaphase/anaphase transition of mitotic cell cycle	35/7844	54/18493	0.000738655	0.00917259	0.00683377	BP
GO:0010524	MF	positive regulation of calcium ion transport into cytosol	35/7844	54/18493	0.000738655	0.00917259	0.00683377	BP
GO:0007015	MF	actin filament organization	200/7844	397/18493	0.000744376	0.00922	0.00686909	BP
GO:0060291	MF	long-term synaptic potentiation	47/7844	77/18493	0.000745372	0.00922	0.00686909	BP
GO:0035150	MF	regulation of tube size	77/7844	137/18493	0.00076435	0.00943639	0.0070303	BP
GO:0009897	MF	external side of plasma membrane	183/8443	359/19659	0.00121046	0.00929635	0.00707165	CC
GO:0072686	MF	mitotic spindle	59/8443	101/19659	0.00122326	0.00930162	0.00707566	CC
GO:0097731	MF	9+0 non-motile cilium	63/8443	109/19659	0.00123924	0.00933072	0.0070978	CC
GO:1901216	MF	positive regulation of neuron death	49/7844	81/18493	0.000775269	0.00955263	0.00711691	BP
GO:0060688	MF	regulation of morphogenesis of a branching structure	36/7844	56/18493	0.000782755	0.00960763	0.00715789	BP
GO:0099601	MF	regulation of neurotransmitter receptor activity	36/7844	56/18493	0.000782755	0.00960763	0.00715789	BP
GO:0006941	MF	striated muscle contraction	92/7844	168/18493	0.000807155	0.00988804	0.00736679	BP
GO:0000079	MF	regulation of cyclin-dependent protein serine/threonine kinase activity	52/7844	87/18493	0.000809363	0.00989602	0.00737274	BP
GO:0051208	MF	sequestering of calcium ion	70/7844	123/18493	0.000815784	0.00995538	0.00741697	BP
GO:0009953	MF	dorsal/ventral pattern formation	53/7844	89/18493	0.000818049	0.0099639	0.00742331	BP
GO:0044728	MF	DNA methylation or demethylation	55/7844	93/18493	0.000831707	0.0100549	0.00749114	BP
GO:0048665	MF	neuron fate specification	24/7844	34/18493	0.00083185	0.0100549	0.00749114	BP
GO:0061384	MF	heart trabecula morphogenesis	24/7844	34/18493	0.00083185	0.0100549	0.00749114	BP
GO:0097421	MF	liver regeneration	24/7844	34/18493	0.00083185	0.0100549	0.00749114	BP
GO:0002695	MF	negative regulation of leukocyte activation	90/7844	164/18493	0.000835263	0.0100648	0.00749847	BP
GO:0034754	MF	cellular hormone metabolic process	66/7844	115/18493	0.000835829	0.0100648	0.00749847	BP
GO:0099565	MF	chemical synaptic transmission, postsynaptic	64/7844	111/18493	0.000842353	0.0100823	0.00751155	BP
GO:0001823	MF	mesonephros development	59/7844	101/18493	0.000845661	0.0100823	0.00751155	BP
GO:0007218	MF	neuropeptide signaling pathway	60/7844	103/18493	0.000846675	0.0100823	0.00751155	BP
GO:0060079	MF	excitatory postsynaptic potential	60/7844	103/18493	0.000846675	0.0100823	0.00751155	BP
GO:0006939	MF	smooth muscle contraction	61/7844	105/18493	0.000846802	0.0100823	0.00751155	BP
GO:0010927	MF	cellular component assembly involved in morphogenesis	61/7844	105/18493	0.000846802	0.0100823	0.00751155	BP
GO:0045577	MF	regulation of B cell differentiation	20/7844	27/18493	0.000856974	0.0101654	0.00757342	BP
GO:1903792	MF	negative regulation of anion transport	20/7844	27/18493	0.000856974	0.0101654	0.00757342	BP
GO:0008373	MF	sialyltransferase activity	17/7872	20/17632	0.000244843	0.00862713	0.00758029	MF
GO:0071456	MF	cellular response to hypoxia	88/7844	160/18493	0.000863568	0.010211	0.00760738	BP
GO:0051306	MF	mitotic sister chromatid separation	38/7844	60/18493	0.000864029	0.010211	0.00760738	BP
GO:0050920	MF	regulation of chemotaxis	112/7844	210/18493	0.000875377	0.0103077	0.00767942	BP
GO:0048483	MF	autonomic nervous system development	30/7844	45/18493	0.000877076	0.0103077	0.00767942	BP
GO:0048701	MF	embryonic cranial skeleton morphogenesis	30/7844	45/18493	0.000877076	0.0103077	0.00767942	BP
GO:2001236	MF	regulation of extrinsic apoptotic signaling pathway	86/7844	156/18493	0.000891964	0.0104633	0.00779538	BP
GO:0032103	MF	positive regulation of response to external stimulus	153/7844	297/18493	0.000899023	0.0105267	0.0078426	BP
GO:0048645	MF	animal organ formation	39/7844	62/18493	0.000901038	0.0105309	0.00784572	BP
GO:0014704	MF	intercalated disc	33/8443	51/19659	0.00140485	0.0103441	0.00786865	CC
GO:0031252	MF	cell leading edge	197/8443	390/19659	0.00142475	0.0103441	0.00786865	CC
GO:0005583	MF	fibrillar collagen trimer	10/8443	11/19659	0.0014277	0.0103441	0.00786865	CC
GO:0098643	MF	banded collagen fibril	10/8443	11/19659	0.0014277	0.0103441	0.00786865	CC
GO:0048739	MF	cardiac muscle fiber development	14/7844	17/18493	0.000915734	0.010683	0.00795906	BP
GO:0060047	MF	heart contraction	128/7844	244/18493	0.000930977	0.0108409	0.00807673	BP
GO:0031406	MF	carboxylic acid binding	110/7872	192/17632	0.0002708	0.00926273	0.00813877	MF
GO:0005504	MF	fatty acid binding	25/7872	33/17632	0.000278346	0.00926273	0.00813877	MF
GO:0010769	MF	regulation of cell morphogenesis involved in differentiation	151/7844	293/18493	0.000946093	0.0109968	0.00819286	BP
GO:0035137	MF	hindlimb morphogenesis	25/7844	36/18493	0.000952017	0.011	0.00819526	BP
GO:0043523	MF	regulation of neuron apoptotic process	108/7844	202/18493	0.000955134	0.011	0.00819526	BP
GO:0002052	MF	positive regulation of neuroblast proliferation	17/7844	22/18493	0.000956752	0.011	0.00819526	BP
GO:0030539	MF	male genitalia development	17/7844	22/18493	0.000956752	0.011	0.00819526	BP
GO:0060479	MF	lung cell differentiation	17/7844	22/18493	0.000956752	0.011	0.00819526	BP
GO:0071677	MF	positive regulation of mononuclear cell migration	17/7844	22/18493	0.000956752	0.011	0.00819526	BP
GO:0002262	MF	myeloid cell homeostasis	81/7844	146/18493	0.000962485	0.011046	0.00822949	BP
GO:0001558	MF	regulation of cell growth	208/7844	416/18493	0.000968177	0.0110913	0.00826325	BP
GO:0044706	MF	multi-multicellular organism process	117/7844	221/18493	0.000975954	0.0111603	0.00831464	BP
GO:0004180	MF	carboxypeptidase activity	32/7872	45/17632	0.000293739	0.00951081	0.00835674	MF
GO:0061035	MF	regulation of cartilage development	42/7844	68/18493	0.000997195	0.0113827	0.00848035	BP
GO:0035725	MF	sodium ion transmembrane transport	78/7844	140/18493	0.00100366	0.011436	0.00852007	BP
GO:0021545	MF	cranial nerve development	32/7844	49/18493	0.00101949	0.0115955	0.00863892	BP
GO:1904427	MF	positive regulation of calcium ion transmembrane transport	43/7844	70/18493	0.00102433	0.0116298	0.00866444	BP
GO:0048240	MF	sperm capacitation	21/7844	29/18493	0.00104005	0.0117662	0.00876608	BP
GO:0060441	MF	epithelial tube branching involved in lung morphogenesis	21/7844	29/18493	0.00104005	0.0117662	0.00876608	BP
GO:0006814	MF	sodium ion transport	114/7844	215/18493	0.00104532	0.0118049	0.0087949	BP
GO:0030204	MF	chondroitin sulfate metabolic process	26/7844	38/18493	0.00107033	0.0119936	0.00893548	BP
GO:0032731	MF	positive regulation of interleukin-1 beta production	26/7844	38/18493	0.00107033	0.0119936	0.00893548	BP
GO:0007492	MF	endoderm development	45/7844	74/18493	0.00107146	0.0119936	0.00893548	BP
GO:0032507	MF	maintenance of protein location in cell	45/7844	74/18493	0.00107146	0.0119936	0.00893548	BP
GO:0072078	MF	nephron tubule morphogenesis	45/7844	74/18493	0.00107146	0.0119936	0.00893548	BP
GO:0071772	MF	response to BMP	90/7844	165/18493	0.00107933	0.0120393	0.00896952	BP
GO:0071773	MF	cellular response to BMP stimulus	90/7844	165/18493	0.00107933	0.0120393	0.00896952	BP
GO:0008076	MF	voltage-gated potassium channel complex	53/8443	90/19659	0.00165007	0.0118435	0.00900924	CC
GO:0034308	MF	primary alcohol metabolic process	46/7844	76/18493	0.00109159	0.0121122	0.00902385	BP
GO:0060411	MF	cardiac septum morphogenesis	46/7844	76/18493	0.00109159	0.0121122	0.00902385	BP
GO:0072088	MF	nephron epithelium morphogenesis	46/7844	76/18493	0.00109159	0.0121122	0.00902385	BP
GO:0003151	MF	outflow tract morphogenesis	47/7844	78/18493	0.00110951	0.0122682	0.00914009	BP
GO:0072028	MF	nephron morphogenesis	47/7844	78/18493	0.00110951	0.0122682	0.00914009	BP
GO:0007611	MF	learning or memory	129/7844	247/18493	0.00111443	0.0123013	0.0091647	BP
GO:0060401	MF	cytosolic calcium ion transport	88/7844	161/18493	0.00111895	0.012309	0.00917043	BP
GO:0010810	MF	regulation of cell-substrate adhesion	111/7844	209/18493	0.001119	0.012309	0.00917043	BP
GO:0002483	MF	antigen processing and presentation of endogenous peptide antigen	12/7844	14/18493	0.00114108	0.0124654	0.00928697	BP
GO:0036159	MF	inner dynein arm assembly	12/7844	14/18493	0.00114108	0.0124654	0.00928697	BP
GO:0051209	MF	release of sequestered calcium ion into cytosol	66/7844	116/18493	0.00114248	0.0124654	0.00928697	BP
GO:0071241	MF	cellular response to inorganic substance	110/7844	207/18493	0.00114454	0.0124654	0.00928697	BP
GO:0007131	MF	reciprocal meiotic recombination	34/7844	53/18493	0.00114839	0.0124654	0.00928697	BP
GO:0035825	MF	homologous recombination	34/7844	53/18493	0.00114839	0.0124654	0.00928697	BP
GO:0042552	MF	myelination	65/7844	114/18493	0.00115081	0.0124654	0.00928697	BP
GO:0072089	MF	stem cell proliferation	65/7844	114/18493	0.00115081	0.0124654	0.00928697	BP
GO:0050886	MF	endocrine process	50/7844	84/18493	0.00115086	0.0124654	0.00928697	BP
GO:0043648	MF	dicarboxylic acid metabolic process	64/7844	112/18493	0.00115842	0.0125046	0.00931622	BP
GO:0046717	MF	acid secretion	64/7844	112/18493	0.00115842	0.0125046	0.00931622	BP
GO:1901019	MF	regulation of calcium ion transmembrane transporter activity	51/7844	86/18493	0.0011608	0.0125091	0.00931951	BP
GO:0098661	MF	inorganic anion transmembrane transport	63/7844	110/18493	0.00116524	0.0125357	0.00933938	BP
GO:0048593	MF	camera-type eye morphogenesis	62/7844	108/18493	0.00117122	0.0125787	0.00937142	BP
GO:0019233	MF	sensory perception of pain	59/7844	102/18493	0.00118341	0.0126045	0.0093906	BP
GO:0001657	MF	ureteric bud development	56/7844	96/18493	0.00118551	0.0126045	0.0093906	BP
GO:0007520	MF	myoblast fusion	27/7844	40/18493	0.00118551	0.0126045	0.0093906	BP
GO:0030225	MF	macrophage differentiation	27/7844	40/18493	0.00118551	0.0126045	0.0093906	BP
GO:0035735	MF	intraciliary transport involved in cilium assembly	27/7844	40/18493	0.00118551	0.0126045	0.0093906	BP
GO:0061900	MF	glial cell activation	27/7844	40/18493	0.00118551	0.0126045	0.0093906	BP
GO:0000070	MF	mitotic sister chromatid segregation	84/7844	153/18493	0.00119951	0.0127277	0.00948238	BP
GO:0043406	MF	positive regulation of MAP kinase activity	134/7844	258/18493	0.0012011	0.0127277	0.00948238	BP
GO:0050770	MF	regulation of axonogenesis	97/7844	180/18493	0.00120434	0.0127407	0.0094921	BP
GO:0003401	MF	axis elongation	22/7844	31/18493	0.00122452	0.0129112	0.00961915	BP
GO:0060325	MF	face morphogenesis	22/7844	31/18493	0.00122452	0.0129112	0.00961915	BP
GO:0003418	MF	growth plate cartilage chondrocyte differentiation	18/7844	24/18493	0.00123449	0.0129306	0.00963355	BP
GO:0021871	MF	forebrain regionalization	18/7844	24/18493	0.00123449	0.0129306	0.00963355	BP
GO:0044458	MF	motile cilium assembly	18/7844	24/18493	0.00123449	0.0129306	0.00963355	BP
GO:0086064	MF	cell communication by electrical coupling involved in cardiac conduction	18/7844	24/18493	0.00123449	0.0129306	0.00963355	BP
GO:0016331	MF	morphogenesis of embryonic epithelium	82/7844	149/18493	0.00124018	0.0129689	0.00966207	BP
GO:0000086	MF	G2/M transition of mitotic cell cycle	106/7844	199/18493	0.00125177	0.0130686	0.00973638	BP
GO:0070527	MF	platelet aggregation	36/7844	57/18493	0.00126219	0.0131557	0.00980127	BP
GO:0016264	MF	gap junction assembly	10/7844	11/18493	0.00127031	0.0131756	0.0098161	BP
GO:0032060	MF	bleb assembly	10/7844	11/18493	0.00127031	0.0131756	0.0098161	BP
GO:0072070	MF	loop of Henle development	10/7844	11/18493	0.00127031	0.0131756	0.0098161	BP
GO:0019898	MF	extrinsic component of membrane	148/8443	287/19659	0.00187833	0.013357	0.0101605	CC
GO:1905939	MF	regulation of gonad development	15/7844	19/18493	0.00132796	0.0137511	0.0102449	BP
GO:0032147	MF	activation of protein kinase activity	164/7844	323/18493	0.00137931	0.0142572	0.0106219	BP
GO:0071706	MF	tumor necrosis factor superfamily cytokine production	75/7844	135/18493	0.00138132	0.0142572	0.0106219	BP
GO:0033628	MF	regulation of cell adhesion mediated by integrin	29/7844	44/18493	0.00140264	0.0144529	0.0107677	BP
GO:0001774	MF	microglial cell activation	23/7844	33/18493	0.0014071	0.0144529	0.0107677	BP
GO:0002269	MF	leukocyte activation involved in inflammatory response	23/7844	33/18493	0.0014071	0.0144529	0.0107677	BP
GO:1903555	MF	regulation of tumor necrosis factor superfamily cytokine production	73/7844	131/18493	0.00142027	0.0145647	0.010851	BP
GO:0032640	MF	tumor necrosis factor production	72/7844	129/18493	0.00143933	0.0146891	0.0109437	BP
GO:0035296	MF	regulation of tube diameter	72/7844	129/18493	0.00143933	0.0146891	0.0109437	BP
GO:0097746	MF	regulation of blood vessel diameter	72/7844	129/18493	0.00143933	0.0146891	0.0109437	BP
GO:0060389	MF	pathway-restricted SMAD protein phosphorylation	40/7844	65/18493	0.00144295	0.0147024	0.0109536	BP
GO:0032680	MF	regulation of tumor necrosis factor production	71/7844	127/18493	0.00145805	0.0148088	0.0110329	BP
GO:0045471	MF	response to ethanol	71/7844	127/18493	0.00145805	0.0148088	0.0110329	BP
GO:0050431	MF	transforming growth factor beta binding	18/7872	22/17632	0.000403645	0.0125603	0.0110362	MF
GO:0003705	MF	transcription factor activity, RNA polymerase II distal enhancer sequence-specific binding	66/7872	108/17632	0.00040889	0.0125603	0.0110362	MF
GO:0031570	MF	DNA integrity checkpoint	86/7844	158/18493	0.00149503	0.0151601	0.0112946	BP
GO:0021517	MF	ventral spinal cord development	30/7844	46/18493	0.00150325	0.0151951	0.0113206	BP
GO:0042461	MF	photoreceptor cell development	30/7844	46/18493	0.00150325	0.0151951	0.0113206	BP
GO:0002088	MF	lens development in camera-type eye	42/7844	69/18493	0.00151069	0.0152218	0.0113406	BP
GO:0055008	MF	cardiac muscle tissue morphogenesis	42/7844	69/18493	0.00151069	0.0152218	0.0113406	BP
GO:0002053	MF	positive regulation of mesenchymal cell proliferation	19/7844	26/18493	0.00151951	0.0152623	0.0113707	BP
GO:0055003	MF	cardiac myofibril assembly	19/7844	26/18493	0.00151951	0.0152623	0.0113707	BP
GO:0006305	MF	DNA alkylation	43/7844	71/18493	0.00153925	0.0154119	0.0114822	BP
GO:0006306	MF	DNA methylation	43/7844	71/18493	0.00153925	0.0154119	0.0114822	BP
GO:0098839	MF	postsynaptic density membrane	45/8443	75/19659	0.00214549	0.0151169	0.0114993	CC
GO:0017015	MF	regulation of transforming growth factor beta receptor signaling pathway	66/7844	117/18493	0.00154475	0.0154426	0.0115051	BP
GO:0005901	MF	caveola	46/8443	77/19659	0.00217894	0.015213	0.0115724	CC
GO:0003014	MF	renal system process	65/7844	115/18493	0.00156029	0.0155662	0.0115971	BP
GO:0032760	MF	positive regulation of tumor necrosis factor production	44/7844	73/18493	0.00156445	0.0155662	0.0115971	BP
GO:0035050	MF	embryonic heart tube development	44/7844	73/18493	0.00156445	0.0155662	0.0115971	BP
GO:0071542	MF	dopaminergic neuron differentiation	24/7844	35/18493	0.0015852	0.0157111	0.0117051	BP
GO:0007422	MF	peripheral nervous system development	45/7844	75/18493	0.00158643	0.0157111	0.0117051	BP
GO:0097061	MF	dendritic spine organization	45/7844	75/18493	0.00158643	0.0157111	0.0117051	BP
GO:0032279	MF	asymmetric synapse	163/8443	320/19659	0.00224714	0.0154432	0.0117475	CC
GO:0000779	MF	condensed chromosome, centromeric region	66/8443	117/19659	0.00225214	0.0154432	0.0117475	CC
GO:0008347	MF	glial cell migration	31/7844	48/18493	0.00159799	0.0157869	0.0117615	BP
GO:0034341	MF	response to interferon-gamma	105/7844	198/18493	0.00159905	0.0157869	0.0117615	BP
GO:0015893	MF	drug transport	114/7844	217/18493	0.0016037	0.0157997	0.0117711	BP
GO:0001570	MF	vasculogenesis	46/7844	77/18493	0.00160532	0.0157997	0.0117711	BP
GO:0030111	MF	regulation of Wnt signaling pathway	158/7844	311/18493	0.00161526	0.015873	0.0118257	BP
GO:0032496	MF	response to lipopolysaccharide	164/7844	324/18493	0.00163418	0.0160341	0.0119458	BP
GO:0048477	MF	oogenesis	50/7844	85/18493	0.00165299	0.0161472	0.01203	BP
GO:0072163	MF	mesonephric epithelium development	56/7844	97/18493	0.00165637	0.0161472	0.01203	BP
GO:0072164	MF	mesonephric tubule development	56/7844	97/18493	0.00165637	0.0161472	0.01203	BP
GO:0061097	MF	regulation of protein tyrosine kinase activity	51/7844	87/18493	0.00165866	0.0161472	0.01203	BP
GO:0007193	MF	adenylate cyclase-inhibiting G protein-coupled receptor signaling pathway	52/7844	89/18493	0.00166211	0.0161472	0.01203	BP
GO:0045639	MF	positive regulation of myeloid cell differentiation	53/7844	91/18493	0.00166348	0.0161472	0.01203	BP
GO:0048144	MF	fibroblast proliferation	53/7844	91/18493	0.00166348	0.0161472	0.01203	BP
GO:0097120	MF	receptor localization to synapse	32/7844	50/18493	0.00168658	0.0163465	0.0121785	BP
GO:0043177	MF	organic acid binding	115/7872	204/17632	0.000472232	0.0141433	0.0124272	MF
GO:0086010	MF	membrane depolarization during action potential	25/7844	37/18493	0.00175683	0.0169498	0.012628	BP
GO:0098534	MF	centriole assembly	25/7844	37/18493	0.00175683	0.0169498	0.012628	BP
GO:1902893	MF	regulation of pri-miRNA transcription by RNA polymerase II	25/7844	37/18493	0.00175683	0.0169498	0.012628	BP
GO:0007289	MF	spermatid nucleus differentiation	16/7844	21/18493	0.00176772	0.016989	0.0126572	BP
GO:0060487	MF	lung epithelial cell differentiation	16/7844	21/18493	0.00176772	0.016989	0.0126572	BP
GO:0021515	MF	cell differentiation in spinal cord	33/7844	52/18493	0.00176891	0.016989	0.0126572	BP
GO:0098984	MF	neuron to neuron synapse	173/8443	342/19659	0.002471	0.016794	0.0127751	CC
GO:0072224	MF	metanephric glomerulus development	13/7844	16/18493	0.00179864	0.0172225	0.0128312	BP
GO:1901841	MF	regulation of high voltage-gated calcium channel activity	13/7844	16/18493	0.00179864	0.0172225	0.0128312	BP
GO:0030048	MF	actin filament-based movement	75/7844	136/18493	0.00181297	0.0173337	0.0129139	BP
GO:0097191	MF	extrinsic apoptotic signaling pathway	117/7844	224/18493	0.00183165	0.0174661	0.0130126	BP
GO:0050731	MF	positive regulation of peptidyl-tyrosine phosphorylation	99/7844	186/18493	0.00183232	0.0174661	0.0130126	BP
GO:0061098	MF	positive regulation of protein tyrosine kinase activity	34/7844	54/18493	0.00184494	0.0175338	0.013063	BP
GO:1902017	MF	regulation of cilium assembly	34/7844	54/18493	0.00184494	0.0175338	0.013063	BP
GO:0090068	MF	positive regulation of cell cycle process	146/7844	286/18493	0.00185898	0.0176409	0.0131428	BP
GO:0050707	MF	regulation of cytokine secretion	98/7844	184/18493	0.00187388	0.017754	0.0132271	BP
GO:0003018	MF	vascular process in circulatory system	87/7844	161/18493	0.00187648	0.017754	0.0132271	BP
GO:0010976	MF	positive regulation of neuron projection development	138/7844	269/18493	0.00191281	0.0180083	0.0134165	BP
GO:0001541	MF	ovarian follicle development	35/7844	56/18493	0.00191469	0.0180083	0.0134165	BP
GO:0022029	MF	telencephalon cell migration	35/7844	56/18493	0.00191469	0.0180083	0.0134165	BP
GO:0044273	MF	sulfur compound catabolic process	35/7844	56/18493	0.00191469	0.0180083	0.0134165	BP
GO:0051930	MF	regulation of sensory perception of pain	26/7844	39/18493	0.00192053	0.0180365	0.0134376	BP
GO:0098691	MF	dopaminergic synapse	11/8443	13/19659	0.00262936	0.0177136	0.0134746	CC
GO:0006310	MF	DNA recombination	144/7844	282/18493	0.00195892	0.0183699	0.0136859	BP
GO:0044839	MF	cell cycle G2/M phase transition	114/7844	218/18493	0.00197182	0.0184637	0.0137558	BP
GO:0015077	MF	monovalent inorganic cation transmembrane transporter activity	205/7872	387/17632	0.000539457	0.0157627	0.01385	MF
GO:0071346	MF	cellular response to interferon-gamma	95/7844	178/18493	0.00200328	0.0187307	0.0139547	BP
GO:0042692	MF	muscle cell differentiation	186/7844	373/18493	0.00202592	0.0189145	0.0140917	BP
GO:0010389	MF	regulation of G2/M transition of mitotic cell cycle	83/7844	153/18493	0.00203138	0.0189236	0.0140985	BP
GO:0006575	MF	cellular modified amino acid metabolic process	104/7844	197/18493	0.00203435	0.0189236	0.0140985	BP
GO:0030166	MF	proteoglycan biosynthetic process	37/7844	60/18493	0.00203582	0.0189236	0.0140985	BP
GO:0009063	MF	cellular amino acid catabolic process	66/7844	118/18493	0.00206675	0.0191831	0.0142918	BP
GO:0003209	MF	cardiac atrium morphogenesis	21/7844	30/18493	0.00208384	0.0192006	0.0143048	BP
GO:0050482	MF	arachidonic acid secretion	21/7844	30/18493	0.00208384	0.0192006	0.0143048	BP
GO:1903963	MF	arachidonate transport	21/7844	30/18493	0.00208384	0.0192006	0.0143048	BP
GO:0045685	MF	regulation of glial cell differentiation	38/7844	62/18493	0.00208752	0.0192006	0.0143048	BP
GO:0060393	MF	regulation of pathway-restricted SMAD protein phosphorylation	38/7844	62/18493	0.00208752	0.0192006	0.0143048	BP
GO:0007272	MF	ensheathment of neurons	65/7844	116/18493	0.00209279	0.0192006	0.0143048	BP
GO:0008366	MF	axon ensheathment	65/7844	116/18493	0.00209279	0.0192006	0.0143048	BP
GO:0042471	MF	ear morphogenesis	65/7844	116/18493	0.00209279	0.0192006	0.0143048	BP
GO:0070252	MF	actin-mediated cell contraction	64/7844	114/18493	0.00211814	0.019405	0.0144572	BP
GO:0003143	MF	embryonic heart tube morphogenesis	39/7844	64/18493	0.00213358	0.0194904	0.0145208	BP
GO:0032651	MF	regulation of interleukin-1 beta production	39/7844	64/18493	0.00213358	0.0194904	0.0145208	BP
GO:0007613	MF	memory	63/7844	112/18493	0.00214268	0.0195455	0.0145618	BP
GO:0015909	MF	long-chain fatty acid transport	40/7844	66/18493	0.00217423	0.0197482	0.0147128	BP
GO:0032387	MF	negative regulation of intracellular transport	40/7844	66/18493	0.00217423	0.0197482	0.0147128	BP
GO:0072171	MF	mesonephric tubule morphogenesis	40/7844	66/18493	0.00217423	0.0197482	0.0147128	BP
GO:0036294	MF	cellular response to decreased oxygen levels	91/7844	170/18493	0.00218696	0.0197696	0.0147287	BP
GO:1902749	MF	regulation of cell cycle G2/M phase transition	91/7844	170/18493	0.00218696	0.0197696	0.0147287	BP
GO:0001676	MF	long-chain fatty acid metabolic process	61/7844	108/18493	0.00218902	0.0197696	0.0147287	BP
GO:0006690	MF	icosanoid metabolic process	61/7844	108/18493	0.00218902	0.0197696	0.0147287	BP
GO:0033047	MF	regulation of mitotic sister chromatid segregation	41/7844	68/18493	0.00220969	0.0199086	0.0148323	BP
GO:0043576	MF	regulation of respiratory gaseous exchange	17/7844	23/18493	0.00221694	0.0199086	0.0148323	BP
GO:0060445	MF	branching involved in salivary gland morphogenesis	17/7844	23/18493	0.00221694	0.0199086	0.0148323	BP
GO:0072243	MF	metanephric nephron epithelium development	17/7844	23/18493	0.00221694	0.0199086	0.0148323	BP
GO:0045185	MF	maintenance of protein location	59/7844	104/18493	0.00223095	0.0200061	0.014905	BP
GO:0034612	MF	response to tumor necrosis factor	132/7844	257/18493	0.00223495	0.0200139	0.0149107	BP
GO:0035335	MF	peptidyl-tyrosine dephosphorylation	58/7844	102/18493	0.00224996	0.0201199	0.0149898	BP
GO:1901606	MF	alpha-amino acid catabolic process	57/7844	100/18493	0.00226752	0.0202484	0.0150855	BP
GO:0045807	MF	positive regulation of endocytosis	77/7844	141/18493	0.00227547	0.0202572	0.0150921	BP
GO:1902106	MF	negative regulation of leukocyte differentiation	56/7844	98/18493	0.00228346	0.0202572	0.0150921	BP
GO:0071453	MF	cellular response to oxygen levels	99/7844	187/18493	0.00228684	0.0202572	0.0150921	BP
GO:0022617	MF	extracellular matrix disassembly	44/7844	74/18493	0.00228751	0.0202572	0.0150921	BP
GO:0021536	MF	diencephalon development	45/7844	76/18493	0.00230475	0.0202572	0.0150921	BP
GO:1903557	MF	positive regulation of tumor necrosis factor superfamily cytokine production	45/7844	76/18493	0.00230475	0.0202572	0.0150921	BP
GO:0009064	MF	glutamine family amino acid metabolic process	46/7844	78/18493	0.00231805	0.0202572	0.0150921	BP
GO:0061333	MF	renal tubule morphogenesis	46/7844	78/18493	0.00231805	0.0202572	0.0150921	BP
GO:0071260	MF	cellular response to mechanical stimulus	46/7844	78/18493	0.00231805	0.0202572	0.0150921	BP
GO:0042116	MF	macrophage activation	47/7844	80/18493	0.00232766	0.0202572	0.0150921	BP
GO:0035249	MF	synaptic transmission, glutamatergic	52/7844	90/18493	0.00232812	0.0202572	0.0150921	BP
GO:0048145	MF	regulation of fibroblast proliferation	52/7844	90/18493	0.00232812	0.0202572	0.0150921	BP
GO:0001675	MF	acrosome assembly	11/7844	13/18493	0.00232904	0.0202572	0.0150921	BP
GO:0021520	MF	spinal cord motor neuron cell fate specification	11/7844	13/18493	0.00232904	0.0202572	0.0150921	BP
GO:0032536	MF	regulation of cell projection size	11/7844	13/18493	0.00232904	0.0202572	0.0150921	BP
GO:0072182	MF	regulation of nephron tubule epithelial cell differentiation	11/7844	13/18493	0.00232904	0.0202572	0.0150921	BP
GO:1900451	MF	positive regulation of glutamate receptor signaling pathway	11/7844	13/18493	0.00232904	0.0202572	0.0150921	BP
GO:1902306	MF	negative regulation of sodium ion transmembrane transport	11/7844	13/18493	0.00232904	0.0202572	0.0150921	BP
GO:2000194	MF	regulation of female gonad development	11/7844	13/18493	0.00232904	0.0202572	0.0150921	BP
GO:0042446	MF	hormone biosynthetic process	49/7844	84/18493	0.00233671	0.0202685	0.0151005	BP
GO:0045778	MF	positive regulation of ossification	49/7844	84/18493	0.00233671	0.0202685	0.0151005	BP
GO:0010039	MF	response to iron ion	22/7844	32/18493	0.0023533	0.0203569	0.0151663	BP
GO:0032594	MF	protein transport within lipid bilayer	22/7844	32/18493	0.0023533	0.0203569	0.0151663	BP
GO:0051250	MF	negative regulation of lymphocyte activation	75/7844	137/18493	0.0023591	0.0203793	0.015183	BP
GO:0099060	MF	integral component of postsynaptic specialization membrane	44/8443	74/19659	0.00305674	0.0204137	0.0155285	CC
GO:0005913	MF	cell-cell adherens junction	62/8443	110/19659	0.0030878	0.0204433	0.0155511	CC
GO:0052547	MF	regulation of peptidase activity	217/7844	442/18493	0.00244336	0.0210216	0.0156615	BP
GO:0031023	MF	microtubule organizing center organization	73/7844	133/18493	0.00244337	0.0210216	0.0156615	BP
GO:0060048	MF	cardiac muscle contraction	73/7844	133/18493	0.00244337	0.0210216	0.0156615	BP
GO:0043123	MF	positive regulation of I-kappaB kinase/NF-kappaB signaling	96/7844	181/18493	0.00245131	0.0210614	0.0156911	BP
GO:0099634	MF	postsynaptic specialization membrane	58/8443	102/19659	0.00316176	0.0206379	0.0156991	CC
GO:0051233	MF	spindle midzone	23/8443	34/19659	0.00317093	0.0206379	0.0156991	CC
GO:0002762	MF	negative regulation of myeloid leukocyte differentiation	30/7844	47/18493	0.0024799	0.021221	0.0158101	BP
GO:0007595	MF	lactation	30/7844	47/18493	0.0024799	0.021221	0.0158101	BP
GO:0150076	MF	neuroinflammatory response	30/7844	47/18493	0.0024799	0.021221	0.0158101	BP
GO:0007498	MF	mesoderm development	72/7844	131/18493	0.00248562	0.0212414	0.0158253	BP
GO:0003414	MF	chondrocyte morphogenesis involved in endochondral bone morphogenesis	14/7844	18/18493	0.00250616	0.0213024	0.0158707	BP
GO:0003429	MF	growth plate cartilage chondrocyte morphogenesis	14/7844	18/18493	0.00250616	0.0213024	0.0158707	BP
GO:0030540	MF	female genitalia development	14/7844	18/18493	0.00250616	0.0213024	0.0158707	BP
GO:0090171	MF	chondrocyte morphogenesis	14/7844	18/18493	0.00250616	0.0213024	0.0158707	BP
GO:0051959	MF	dynein light intermediate chain binding	22/7872	29/17632	0.000633791	0.0180781	0.0158845	MF
GO:0030099	MF	myeloid cell differentiation	200/7844	405/18493	0.00251915	0.0213842	0.0159317	BP
GO:0051051	MF	negative regulation of transport	241/7844	495/18493	0.00252798	0.0214305	0.0159662	BP
GO:0051402	MF	neuron apoptotic process	119/7844	230/18493	0.0025869	0.0219008	0.0163166	BP
GO:0010718	MF	positive regulation of epithelial to mesenchymal transition	31/7844	49/18493	0.00259429	0.0219204	0.0163311	BP
GO:0003230	MF	cardiac atrium development	23/7844	34/18493	0.0026099	0.0219204	0.0163311	BP
GO:0007099	MF	centriole replication	23/7844	34/18493	0.0026099	0.0219204	0.0163311	BP
GO:0010464	MF	regulation of mesenchymal cell proliferation	23/7844	34/18493	0.0026099	0.0219204	0.0163311	BP
GO:0042462	MF	eye photoreceptor cell development	23/7844	34/18493	0.0026099	0.0219204	0.0163311	BP
GO:0140115	MF	export across plasma membrane	23/7844	34/18493	0.0026099	0.0219204	0.0163311	BP
GO:0014069	MF	postsynaptic density	160/8443	316/19659	0.00333283	0.0215094	0.016362	CC
GO:0030315	MF	T-tubule	32/8443	51/19659	0.00342129	0.0217153	0.0165186	CC
GO:0099061	MF	integral component of postsynaptic density membrane	32/8443	51/19659	0.00342129	0.0217153	0.0165186	CC
GO:0051307	MF	meiotic chromosome separation	18/7844	25/18493	0.00266198	0.0222696	0.0165913	BP
GO:0060571	MF	morphogenesis of an epithelial fold	18/7844	25/18493	0.00266198	0.0222696	0.0165913	BP
GO:0080154	MF	regulation of fertilization	18/7844	25/18493	0.00266198	0.0222696	0.0165913	BP
GO:1903844	MF	regulation of cellular response to transforming growth factor beta stimulus	66/7844	119/18493	0.002737	0.0226949	0.0169082	BP
GO:0002934	MF	desmosome organization	9/7844	10/18493	0.00274138	0.0226949	0.0169082	BP
GO:0030259	MF	lipid glycosylation	9/7844	10/18493	0.00274138	0.0226949	0.0169082	BP
GO:0032328	MF	alanine transport	9/7844	10/18493	0.00274138	0.0226949	0.0169082	BP
GO:0060033	MF	anatomical structure regression	9/7844	10/18493	0.00274138	0.0226949	0.0169082	BP
GO:0060287	MF	epithelial cilium movement involved in determination of left/right asymmetry	9/7844	10/18493	0.00274138	0.0226949	0.0169082	BP
GO:0072672	MF	neutrophil extravasation	9/7844	10/18493	0.00274138	0.0226949	0.0169082	BP
GO:2001198	MF	regulation of dendritic cell differentiation	9/7844	10/18493	0.00274138	0.0226949	0.0169082	BP
GO:0001818	MF	negative regulation of cytokine production	131/7844	256/18493	0.00275342	0.0227649	0.0169603	BP
GO:0090287	MF	regulation of cellular response to growth factor stimulus	143/7844	282/18493	0.00285045	0.0235366	0.0175352	BP
GO:0048146	MF	positive regulation of fibroblast proliferation	34/7844	55/18493	0.00287741	0.0237284	0.0176781	BP
GO:0031346	MF	positive regulation of cell projection organization	184/7844	371/18493	0.00288519	0.0237617	0.017703	BP
GO:0071478	MF	cellular response to radiation	98/7844	186/18493	0.00290655	0.0239066	0.0178109	BP
GO:0034358	MF	plasma lipoprotein particle	25/8443	38/19659	0.00376765	0.0234386	0.0178295	CC
GO:1990777	MF	lipoprotein particle	25/8443	38/19659	0.00376765	0.0234386	0.0178295	CC
GO:0043204	MF	perikaryon	69/8443	125/19659	0.00378435	0.0234386	0.0178295	CC
GO:0015696	MF	ammonium transport	61/7844	109/18493	0.0029349	0.0241087	0.0179615	BP
GO:0071356	MF	cellular response to tumor necrosis factor	121/7844	235/18493	0.00297209	0.0243827	0.0181656	BP
GO:0030308	MF	negative regulation of cell growth	97/7844	184/18493	0.00297681	0.0243899	0.018171	BP
GO:0055002	MF	striated muscle cell development	87/7844	163/18493	0.00300668	0.0246029	0.0183297	BP
GO:0072678	MF	T cell migration	36/7844	59/18493	0.00301922	0.0246738	0.0183825	BP
GO:0030673	MF	axolemma	12/8443	15/19659	0.00395855	0.0243213	0.018501	CC
GO:0021915	MF	neural tube development	86/7844	161/18493	0.00307431	0.0250191	0.0186397	BP
GO:1990138	MF	neuron projection extension	86/7844	161/18493	0.00307431	0.0250191	0.0186397	BP
GO:0008207	MF	C21-steroid hormone metabolic process	25/7844	38/18493	0.00307702	0.0250191	0.0186397	BP
GO:0016266	MF	O-glycan processing	37/7844	61/18493	0.00307721	0.0250191	0.0186397	BP
GO:0035902	MF	response to immobilization stress	19/7844	27/18493	0.00309303	0.0250516	0.018664	BP
GO:0045671	MF	negative regulation of osteoclast differentiation	19/7844	27/18493	0.00309303	0.0250516	0.018664	BP
GO:1902895	MF	positive regulation of pri-miRNA transcription by RNA polymerase II	19/7844	27/18493	0.00309303	0.0250516	0.018664	BP
GO:0002685	MF	regulation of leukocyte migration	95/7844	180/18493	0.00312197	0.0252538	0.0188146	BP
GO:0005539	MF	glycosaminoglycan binding	123/7872	222/17632	0.000771517	0.0214948	0.0188866	MF
GO:0007292	MF	female gamete generation	73/7844	134/18493	0.00316287	0.0255087	0.0190045	BP
GO:0007585	MF	respiratory gaseous exchange	39/7844	65/18493	0.00316953	0.0255087	0.0190045	BP
GO:0060675	MF	ureteric bud morphogenesis	39/7844	65/18493	0.00316953	0.0255087	0.0190045	BP
GO:0099072	MF	regulation of postsynaptic membrane neurotransmitter receptor levels	39/7844	65/18493	0.00316953	0.0255087	0.0190045	BP
GO:0007589	MF	body fluid secretion	53/7844	93/18493	0.00319101	0.0256491	0.0191091	BP
GO:0051966	MF	regulation of synaptic transmission, glutamatergic	40/7844	67/18493	0.00320475	0.0256672	0.0191226	BP
GO:0061515	MF	myeloid cell development	40/7844	67/18493	0.00320475	0.0256672	0.0191226	BP
GO:0046634	MF	regulation of alpha-beta T cell activation	52/7844	91/18493	0.00321431	0.0256672	0.0191226	BP
GO:0006525	MF	arginine metabolic process	15/7844	20/18493	0.00322556	0.0256672	0.0191226	BP
GO:0032891	MF	negative regulation of organic acid transport	15/7844	20/18493	0.00322556	0.0256672	0.0191226	BP
GO:0032928	MF	regulation of superoxide anion generation	15/7844	20/18493	0.00322556	0.0256672	0.0191226	BP
GO:0060602	MF	branch elongation of an epithelium	15/7844	20/18493	0.00322556	0.0256672	0.0191226	BP
GO:0072234	MF	metanephric nephron tubule development	15/7844	20/18493	0.00322556	0.0256672	0.0191226	BP
GO:0048708	MF	astrocyte differentiation	41/7844	69/18493	0.00323324	0.0256961	0.0191442	BP
GO:1902476	MF	chloride transmembrane transport	50/7844	87/18493	0.00325273	0.0256974	0.0191451	BP
GO:0071804	MF	cellular potassium ion transport	110/7844	212/18493	0.00325317	0.0256974	0.0191451	BP
GO:0071805	MF	potassium ion transmembrane transport	110/7844	212/18493	0.00325317	0.0256974	0.0191451	BP
GO:0001895	MF	retina homeostasis	43/7844	73/18493	0.00327175	0.0256974	0.0191451	BP
GO:0032611	MF	interleukin-1 beta production	43/7844	73/18493	0.00327175	0.0256974	0.0191451	BP
GO:0007009	MF	plasma membrane organization	48/7844	83/18493	0.0032785	0.0256974	0.0191451	BP
GO:0106027	MF	neuron projection organization	48/7844	83/18493	0.0032785	0.0256974	0.0191451	BP
GO:0043618	MF	regulation of transcription from RNA polymerase II promoter in response to stress	44/7844	75/18493	0.00328258	0.0256974	0.0191451	BP
GO:0014014	MF	negative regulation of gliogenesis	26/7844	40/18493	0.00328555	0.0256974	0.0191451	BP
GO:0051281	MF	positive regulation of release of sequestered calcium ion into cytosol	26/7844	40/18493	0.00328555	0.0256974	0.0191451	BP
GO:0051931	MF	regulation of sensory perception	26/7844	40/18493	0.00328555	0.0256974	0.0191451	BP
GO:0090184	MF	positive regulation of kidney development	26/7844	40/18493	0.00328555	0.0256974	0.0191451	BP
GO:0032755	MF	positive regulation of interleukin-6 production	47/7844	81/18493	0.00328594	0.0256974	0.0191451	BP
GO:0070372	MF	regulation of ERK1 and ERK2 cascade	162/7844	324/18493	0.00329677	0.0257505	0.0191846	BP
GO:0030278	MF	regulation of ossification	101/7844	193/18493	0.00333335	0.0260042	0.0193737	BP
GO:0046887	MF	positive regulation of hormone secretion	70/7844	128/18493	0.0033441	0.0260561	0.0194123	BP
GO:0044291	MF	cell-cell contact zone	42/8443	71/19659	0.00428284	0.0261049	0.0198578	CC
GO:0001505	MF	regulation of neurotransmitter levels	172/7844	346/18493	0.00342621	0.0266632	0.0198647	BP
GO:0032459	MF	regulation of protein oligomerization	27/7844	42/18493	0.0034769	0.0269916	0.0201093	BP
GO:0071675	MF	regulation of mononuclear cell migration	27/7844	42/18493	0.0034769	0.0269916	0.0201093	BP
GO:0001911	MF	negative regulation of leukocyte mediated cytotoxicity	12/7844	15/18493	0.00349102	0.0270023	0.0201173	BP
GO:0002031	MF	G protein-coupled receptor internalization	12/7844	15/18493	0.00349102	0.0270023	0.0201173	BP
GO:0048368	MF	lateral mesoderm development	12/7844	15/18493	0.00349102	0.0270023	0.0201173	BP
GO:0048771	MF	tissue remodeling	90/7844	170/18493	0.00351299	0.0271393	0.0202193	BP
GO:0051101	MF	regulation of DNA binding	67/7844	122/18493	0.00352751	0.0272183	0.0202782	BP
GO:0008235	MF	metalloexopeptidase activity	41/7872	63/17632	0.000849903	0.0231405	0.0203326	MF
GO:0032886	MF	regulation of microtubule-based process	106/7844	204/18493	0.00360061	0.0277487	0.0206734	BP
GO:0061614	MF	pri-miRNA transcription by RNA polymerase II	28/7844	44/18493	0.00365114	0.028104	0.0209381	BP
GO:0008569	MF	ATP-dependent microtubule motor activity, minus-end-directed	15/7872	18/17632	0.000896174	0.0238581	0.0209631	MF
GO:0030666	MF	endocytic vesicle membrane	87/8443	163/19659	0.00456057	0.0275789	0.020979	CC
GO:0042398	MF	cellular modified amino acid biosynthetic process	29/7844	46/18493	0.00380859	0.0292806	0.0218146	BP
GO:0099572	MF	postsynaptic specialization	170/8443	340/19659	0.00487996	0.0291221	0.0221529	CC
GO:0030018	MF	Z disc	69/8443	126/19659	0.00489178	0.0291221	0.0221529	CC
GO:0001917	MF	photoreceptor inner segment	30/8443	48/19659	0.00492953	0.0291221	0.0221529	CC
GO:0050808	MF	synapse organization	189/7844	384/18493	0.00388825	0.0298221	0.0222181	BP
GO:0048873	MF	homeostasis of number of cells within a tissue	21/7844	31/18493	0.00388841	0.0298221	0.0222181	BP
GO:0009651	MF	response to salt stress	16/7844	22/18493	0.00393029	0.030107	0.0224303	BP
GO:0043434	MF	response to peptide hormone	204/7844	417/18493	0.003943	0.0301471	0.0224602	BP
GO:0003179	MF	heart valve morphogenesis	30/7844	48/18493	0.00394976	0.0301471	0.0224602	BP
GO:0016339	MF	calcium-dependent cell-cell adhesion via plasma membrane cell adhesion molecules	30/7844	48/18493	0.00394976	0.0301471	0.0224602	BP
GO:0005247	MF	voltage-gated chloride channel activity	11/7872	12/17632	0.000992548	0.0258494	0.0227128	MF
GO:0002683	MF	negative regulation of immune system process	213/7844	437/18493	0.00405448	0.0309093	0.0230281	BP
GO:0009994	MF	oocyte differentiation	31/7844	50/18493	0.00407527	0.0309935	0.0230908	BP
GO:0010171	MF	body morphogenesis	31/7844	50/18493	0.00407527	0.0309935	0.0230908	BP
GO:0034774	MF	secretory granule lumen	161/8443	321/19659	0.00518773	0.0304135	0.0231353	CC
GO:0001503	MF	ossification	187/7844	380/18493	0.00410074	0.03115	0.0232074	BP
GO:1901222	MF	regulation of NIK/NF-kappaB signaling	57/7844	102/18493	0.0041221	0.0312749	0.0233004	BP
GO:0045666	MF	positive regulation of neuron differentiation	176/7844	356/18493	0.0041354	0.0313011	0.0233199	BP
GO:1901653	MF	cellular response to peptide	176/7844	356/18493	0.0041354	0.0313011	0.0233199	BP
GO:0033267	MF	axon part	185/8443	373/19659	0.00528113	0.0307265	0.0233734	CC
GO:0030148	MF	sphingolipid biosynthetic process	56/7844	100/18493	0.0041767	0.0315761	0.0235248	BP
GO:0002763	MF	positive regulation of myeloid leukocyte differentiation	32/7844	52/18493	0.00418585	0.0316076	0.0235483	BP
GO:0010092	MF	specification of animal organ identity	22/7844	33/18493	0.00424571	0.0319837	0.0238285	BP
GO:0042755	MF	eating behavior	22/7844	33/18493	0.00424571	0.0319837	0.0238285	BP
GO:0003170	MF	heart valve development	33/7844	54/18493	0.00428225	0.0321826	0.0239767	BP
GO:0090183	MF	regulation of kidney development	33/7844	54/18493	0.00428225	0.0321826	0.0239767	BP
GO:0002793	MF	positive regulation of peptide secretion	134/7844	265/18493	0.00429451	0.0322284	0.0240108	BP
GO:0051048	MF	negative regulation of secretion	114/7844	222/18493	0.00429847	0.0322284	0.0240108	BP
GO:0055007	MF	cardiac muscle cell differentiation	70/7844	129/18493	0.0043125	0.0322575	0.0240325	BP
GO:1902850	MF	microtubule cytoskeleton organization involved in mitosis	70/7844	129/18493	0.0043125	0.0322575	0.0240325	BP
GO:0030509	MF	BMP signaling pathway	81/7844	152/18493	0.00432469	0.0323107	0.0240721	BP
GO:0097546	MF	ciliary base	23/8443	35/19659	0.00551226	0.0318302	0.024213	CC
GO:0050819	MF	negative regulation of coagulation	34/7844	56/18493	0.00436526	0.0325755	0.0242694	BP
GO:0044282	MF	small molecule catabolic process	210/7844	431/18493	0.00438626	0.0326939	0.0243576	BP
GO:0000777	MF	condensed chromosome kinetochore	58/8443	104/19659	0.0056191	0.032205	0.024498	CC
GO:0001836	MF	release of cytochrome c from mitochondria	35/7844	58/18493	0.00443568	0.0329079	0.0245171	BP
GO:0001947	MF	heart looping	35/7844	58/18493	0.00443568	0.0329079	0.0245171	BP
GO:0031646	MF	positive regulation of neurological system process	35/7844	58/18493	0.00443568	0.0329079	0.0245171	BP
GO:1902041	MF	regulation of extrinsic apoptotic signaling pathway via death domain receptors	35/7844	58/18493	0.00443568	0.0329079	0.0245171	BP
GO:0001658	MF	branching involved in ureteric bud morphogenesis	36/7844	60/18493	0.00449432	0.0333041	0.0248122	BP
GO:0031674	MF	I band	74/8443	137/19659	0.00576613	0.0328029	0.0249529	CC
GO:0006879	MF	cellular iron ion homeostasis	37/7844	62/18493	0.00454195	0.0336179	0.025046	BP
GO:0071158	MF	positive regulation of cell cycle arrest	47/7844	82/18493	0.00456451	0.0337156	0.0251188	BP
GO:1903539	MF	protein localization to postsynaptic membrane	23/7844	35/18493	0.0045739	0.0337156	0.0251188	BP
GO:0051279	MF	regulation of release of sequestered calcium ion into cytosol	46/7844	80/18493	0.00459039	0.0337156	0.0251188	BP
GO:0071277	MF	cellular response to calcium ion	46/7844	80/18493	0.00459039	0.0337156	0.0251188	BP
GO:0021511	MF	spinal cord patterning	17/7844	24/18493	0.00460288	0.0337156	0.0251188	BP
GO:0022400	MF	regulation of rhodopsin mediated signaling pathway	17/7844	24/18493	0.00460288	0.0337156	0.0251188	BP
GO:0062009	MF	secondary palate development	17/7844	24/18493	0.00460288	0.0337156	0.0251188	BP
GO:0099632	MF	protein transport within plasma membrane	17/7844	24/18493	0.00460288	0.0337156	0.0251188	BP
GO:0099637	MF	neurotransmitter receptor transport	17/7844	24/18493	0.00460288	0.0337156	0.0251188	BP
GO:0042698	MF	ovulation cycle	40/7844	68/18493	0.00462625	0.0338038	0.0251846	BP
GO:0010212	MF	response to ionizing radiation	78/7844	146/18493	0.00462744	0.0338038	0.0251846	BP
GO:0086001	MF	cardiac muscle cell action potential	43/7844	74/18493	0.00463699	0.0338038	0.0251846	BP
GO:0006883	MF	cellular sodium ion homeostasis	13/7844	17/18493	0.0046681	0.0338038	0.0251846	BP
GO:0014874	MF	response to stimulus involved in regulation of muscle adaptation	13/7844	17/18493	0.0046681	0.0338038	0.0251846	BP
GO:0021783	MF	preganglionic parasympathetic fiber development	13/7844	17/18493	0.0046681	0.0338038	0.0251846	BP
GO:0032693	MF	negative regulation of interleukin-10 production	13/7844	17/18493	0.0046681	0.0338038	0.0251846	BP
GO:0042095	MF	interferon-gamma biosynthetic process	13/7844	17/18493	0.0046681	0.0338038	0.0251846	BP
GO:0043651	MF	linoleic acid metabolic process	13/7844	17/18493	0.0046681	0.0338038	0.0251846	BP
GO:0060850	MF	regulation of transcription involved in cell fate commitment	13/7844	17/18493	0.0046681	0.0338038	0.0251846	BP
GO:0051100	MF	negative regulation of binding	87/7844	165/18493	0.00469071	0.0338056	0.0251858	BP
GO:0003161	MF	cardiac conduction system development	10/7844	12/18493	0.00470024	0.0338056	0.0251858	BP
GO:0031034	MF	myosin filament assembly	10/7844	12/18493	0.00470024	0.0338056	0.0251858	BP
GO:0032429	MF	regulation of phospholipase A2 activity	10/7844	12/18493	0.00470024	0.0338056	0.0251858	BP
GO:0051956	MF	negative regulation of amino acid transport	10/7844	12/18493	0.00470024	0.0338056	0.0251858	BP
GO:2000650	MF	negative regulation of sodium ion transmembrane transporter activity	10/7844	12/18493	0.00470024	0.0338056	0.0251858	BP
GO:0007098	MF	centrosome cycle	65/7844	119/18493	0.0047489	0.0341169	0.0254178	BP
GO:0001750	MF	photoreceptor outer segment	48/8443	84/19659	0.00604611	0.0341427	0.0259721	CC
GO:0048639	MF	positive regulation of developmental growth	94/7844	180/18493	0.00487256	0.0349268	0.0260212	BP
GO:0045494	MF	photoreceptor cell maintenance	24/7844	37/18493	0.00487262	0.0349268	0.0260212	BP
GO:0007519	MF	skeletal muscle tissue development	85/7844	161/18493	0.00492149	0.0352375	0.0262526	BP
GO:0198738	MF	cell-cell signaling by wnt	225/7844	465/18493	0.00492857	0.0352484	0.0262608	BP
GO:0006836	MF	neurotransmitter transport	135/7844	268/18493	0.00494013	0.0352914	0.0262928	BP
GO:0008238	MF	exopeptidase activity	67/7872	113/17632	0.00119204	0.0303844	0.0266975	MF
GO:0016055	MF	Wnt signaling pathway	224/7844	463/18493	0.0050577	0.0360907	0.0268883	BP
GO:0006813	MF	potassium ion transport	121/7844	238/18493	0.00512089	0.0364599	0.0271633	BP
GO:0034329	MF	cell junction assembly	121/7844	238/18493	0.00512089	0.0364599	0.0271633	BP
GO:1903053	MF	regulation of extracellular matrix organization	25/7844	39/18493	0.00514219	0.0365705	0.0272458	BP
GO:0003279	MF	cardiac septum development	60/7844	109/18493	0.00519459	0.0369019	0.0274927	BP
GO:0010954	MF	positive regulation of protein processing	18/7844	26/18493	0.00523255	0.0370474	0.0276011	BP
GO:0050926	MF	regulation of positive chemotaxis	18/7844	26/18493	0.00523255	0.0370474	0.0276011	BP
GO:0099590	MF	neurotransmitter receptor internalization	18/7844	26/18493	0.00523255	0.0370474	0.0276011	BP
GO:0019932	MF	second-messenger-mediated signaling	213/7844	439/18493	0.00524178	0.0370715	0.027619	BP
GO:0052548	MF	regulation of endopeptidase activity	203/7844	417/18493	0.0052703	0.0372317	0.0277384	BP
GO:0016010	MF	dystrophin-associated glycoprotein complex	14/8443	19/19659	0.00663934	0.0366836	0.0279049	CC
GO:0031362	MF	anchored component of external side of plasma membrane	14/8443	19/19659	0.00663934	0.0366836	0.0279049	CC
GO:0090665	MF	glycoprotein complex	14/8443	19/19659	0.00663934	0.0366836	0.0279049	CC
GO:0061387	MF	regulation of extent of cell growth	58/7844	105/18493	0.00537191	0.0378654	0.0282105	BP
GO:0098739	MF	import across plasma membrane	58/7844	105/18493	0.00537191	0.0378654	0.0282105	BP
GO:0006865	MF	amino acid transport	71/7844	132/18493	0.00539642	0.0379961	0.0283079	BP
GO:0032091	MF	negative regulation of protein binding	57/7844	103/18493	0.00545968	0.038399	0.028608	BP
GO:0022408	MF	negative regulation of cell-cell adhesion	89/7844	170/18493	0.005521	0.0387873	0.0288973	BP
GO:0051098	MF	regulation of binding	181/7844	369/18493	0.00552716	0.0387877	0.0288976	BP
GO:0008360	MF	regulation of cell shape	80/7844	151/18493	0.00554317	0.0388144	0.0289175	BP
GO:0051017	MF	actin filament bundle assembly	80/7844	151/18493	0.00554317	0.0388144	0.0289175	BP
GO:0097542	MF	ciliary tip	28/8443	45/19659	0.00710818	0.0389935	0.029662	CC
GO:0002704	MF	negative regulation of leukocyte mediated immunity	28/7844	45/18493	0.00578558	0.0401746	0.0299309	BP
GO:0045619	MF	regulation of lymphocyte differentiation	87/7844	166/18493	0.00580256	0.0401746	0.0299309	BP
GO:0002029	MF	desensitization of G protein-coupled receptor signaling pathway	14/7844	19/18493	0.00580513	0.0401746	0.0299309	BP
GO:0003422	MF	growth plate cartilage morphogenesis	14/7844	19/18493	0.00580513	0.0401746	0.0299309	BP
GO:0022401	MF	negative adaptation of signaling pathway	14/7844	19/18493	0.00580513	0.0401746	0.0299309	BP
GO:0036035	MF	osteoclast development	14/7844	19/18493	0.00580513	0.0401746	0.0299309	BP
GO:0061003	MF	positive regulation of dendritic spine morphogenesis	14/7844	19/18493	0.00580513	0.0401746	0.0299309	BP
GO:0090190	MF	positive regulation of branching involved in ureteric bud morphogenesis	14/7844	19/18493	0.00580513	0.0401746	0.0299309	BP
GO:0098727	MF	maintenance of cell number	78/7844	147/18493	0.00581035	0.0401746	0.0299309	BP
GO:0007263	MF	nitric oxide mediated signal transduction	19/7844	28/18493	0.00581325	0.0401746	0.0299309	BP
GO:0032196	MF	transposition	19/7844	28/18493	0.00581325	0.0401746	0.0299309	BP
GO:1903319	MF	positive regulation of protein maturation	19/7844	28/18493	0.00581325	0.0401746	0.0299309	BP
GO:0042734	MF	presynaptic membrane	85/8443	161/19659	0.00728966	0.0396822	0.0301859	CC
GO:0030286	MF	dynein complex	29/8443	47/19659	0.00733708	0.0396822	0.0301859	CC
GO:0072330	MF	monocarboxylic acid biosynthetic process	146/7844	293/18493	0.0059211	0.0408041	0.0303999	BP
GO:0008277	MF	regulation of G protein-coupled receptor signaling pathway	77/7844	145/18493	0.00594801	0.0408041	0.0303999	BP
GO:0006937	MF	regulation of muscle contraction	86/7844	164/18493	0.00594834	0.0408041	0.0303999	BP
GO:0030178	MF	negative regulation of Wnt signaling pathway	86/7844	164/18493	0.00594834	0.0408041	0.0303999	BP
GO:0006636	MF	unsaturated fatty acid biosynthetic process	29/7844	47/18493	0.00594926	0.0408041	0.0303999	BP
GO:0030850	MF	prostate gland development	29/7844	47/18493	0.00594926	0.0408041	0.0303999	BP
GO:0060986	MF	endocrine hormone secretion	29/7844	47/18493	0.00594926	0.0408041	0.0303999	BP
GO:0001518	MF	voltage-gated sodium channel complex	11/8443	14/19659	0.00748839	0.0399636	0.0303999	CC
GO:0034451	MF	centriolar satellite	20/8443	30/19659	0.00749317	0.0399636	0.0303999	CC
GO:0044070	MF	regulation of anion transport	51/7844	91/18493	0.00595915	0.0408279	0.0304176	BP
GO:0032330	MF	regulation of chondrocyte differentiation	30/7844	49/18493	0.00608998	0.0416345	0.0310186	BP
GO:0032648	MF	regulation of interferon-beta production	30/7844	49/18493	0.00608998	0.0416345	0.0310186	BP
GO:0042475	MF	odontogenesis of dentin-containing tooth	49/7844	87/18493	0.00610817	0.0417049	0.031071	BP
GO:0031345	MF	negative regulation of cell projection organization	93/7844	179/18493	0.00611843	0.0417049	0.031071	BP
GO:0038061	MF	NIK/NF-kappaB signaling	65/7844	120/18493	0.00611995	0.0417049	0.031071	BP
GO:0051346	MF	negative regulation of hydrolase activity	221/7844	458/18493	0.00617597	0.0419639	0.031264	BP
GO:0008652	MF	cellular amino acid biosynthetic process	48/7844	85/18493	0.00617776	0.0419639	0.031264	BP
GO:0009100	MF	glycoprotein metabolic process	192/7844	394/18493	0.00617776	0.0419639	0.031264	BP
GO:0032608	MF	interferon-beta production	31/7844	51/18493	0.00620927	0.042088	0.0313564	BP
GO:0048260	MF	positive regulation of receptor-mediated endocytosis	31/7844	51/18493	0.00620927	0.042088	0.0313564	BP
GO:0031983	MF	vesicle lumen	168/8443	339/19659	0.00785589	0.041224	0.0313587	CC
GO:0005922	MF	connexin complex	15/8443	21/19659	0.00789054	0.041224	0.0313587	CC
GO:0043073	MF	germ cell nucleus	15/8443	21/19659	0.00789054	0.041224	0.0313587	CC
GO:0007612	MF	learning	75/7844	141/18493	0.00623153	0.0421939	0.0314353	BP
GO:0034599	MF	cellular response to oxidative stress	144/7844	289/18493	0.00625001	0.042274	0.031495	BP
GO:0022406	MF	membrane docking	92/7844	177/18493	0.00627722	0.0424129	0.0315985	BP
GO:0007162	MF	negative regulation of cell adhesion	138/7844	276/18493	0.00629069	0.0424588	0.0316327	BP
GO:0043620	MF	regulation of DNA-templated transcription in response to stress	46/7844	81/18493	0.0063048	0.0424896	0.0316557	BP
GO:0036092	MF	phosphatidylinositol-3-phosphate biosynthetic process	32/7844	53/18493	0.00630862	0.0424896	0.0316557	BP
GO:0001569	MF	branching involved in blood vessel morphogenesis	20/7844	30/18493	0.00634226	0.0426259	0.0317572	BP
GO:0010743	MF	regulation of macrophage derived foam cell differentiation	20/7844	30/18493	0.00634226	0.0426259	0.0317572	BP
GO:0045503	MF	dynein light chain binding	19/7872	25/17632	0.0014543	0.0362969	0.0318926	MF
GO:0045171	MF	intercellular bridge	34/8443	57/19659	0.00810939	0.0420812	0.0320108	CC
GO:0097237	MF	cellular response to toxic substance	119/7844	235/18493	0.00642535	0.0431387	0.0321393	BP
GO:0098948	MF	intrinsic component of postsynaptic specialization membrane	44/8443	77/19659	0.00835857	0.0426547	0.032447	CC
GO:0016459	MF	myosin complex	38/8443	65/19659	0.00837069	0.0426547	0.032447	CC
GO:0099056	MF	integral component of presynaptic membrane	43/8443	75/19659	0.00838653	0.0426547	0.032447	CC
GO:0042310	MF	vasoconstriction	42/7844	73/18493	0.006495	0.0435571	0.0324509	BP
GO:0030888	MF	regulation of B cell proliferation	35/7844	59/18493	0.00650136	0.0435571	0.0324509	BP
GO:0048545	MF	response to steroid hormone	190/7844	390/18493	0.00651216	0.0435835	0.0324706	BP
GO:0046635	MF	positive regulation of alpha-beta T cell activation	36/7844	61/18493	0.00653496	0.0436372	0.0325106	BP
GO:0048747	MF	muscle fiber development	36/7844	61/18493	0.00653496	0.0436372	0.0325106	BP
GO:0010517	MF	regulation of phospholipase activity	40/7844	69/18493	0.00654764	0.0436372	0.0325106	BP
GO:0060395	MF	SMAD protein signal transduction	40/7844	69/18493	0.00654764	0.0436372	0.0325106	BP
GO:0006304	MF	DNA modification	61/7844	112/18493	0.00662859	0.0439984	0.0327797	BP
GO:0035690	MF	cellular response to drug	174/7844	355/18493	0.00665977	0.0439984	0.0327797	BP
GO:0007501	MF	mesodermal cell fate specification	11/7844	14/18493	0.00668488	0.0439984	0.0327797	BP
GO:0035810	MF	positive regulation of urine volume	11/7844	14/18493	0.00668488	0.0439984	0.0327797	BP
GO:0043584	MF	nose development	11/7844	14/18493	0.00668488	0.0439984	0.0327797	BP
GO:0045651	MF	positive regulation of macrophage differentiation	11/7844	14/18493	0.00668488	0.0439984	0.0327797	BP
GO:0071599	MF	otic vesicle development	11/7844	14/18493	0.00668488	0.0439984	0.0327797	BP
GO:0086069	MF	bundle of His cell to Purkinje myocyte communication	11/7844	14/18493	0.00668488	0.0439984	0.0327797	BP
GO:0090231	MF	regulation of spindle checkpoint	11/7844	14/18493	0.00668488	0.0439984	0.0327797	BP
GO:0090266	MF	regulation of mitotic cell cycle spindle assembly checkpoint	11/7844	14/18493	0.00668488	0.0439984	0.0327797	BP
GO:1903504	MF	regulation of mitotic spindle checkpoint	11/7844	14/18493	0.00668488	0.0439984	0.0327797	BP
GO:1905516	MF	positive regulation of fertilization	11/7844	14/18493	0.00668488	0.0439984	0.0327797	BP
GO:0006665	MF	sphingolipid metabolic process	81/7844	154/18493	0.00672981	0.0441789	0.0329142	BP
GO:0043271	MF	negative regulation of ion transport	81/7844	154/18493	0.00672981	0.0441789	0.0329142	BP
GO:0043903	MF	regulation of symbiosis, encompassing mutualism through parasitism	104/7844	203/18493	0.00673316	0.0441789	0.0329142	BP
GO:0008608	MF	attachment of spindle microtubules to kinetochore	21/7844	32/18493	0.00681908	0.0446046	0.0332314	BP
GO:0016486	MF	peptide hormone processing	21/7844	32/18493	0.00681908	0.0446046	0.0332314	BP
GO:0021988	MF	olfactory lobe development	21/7844	32/18493	0.00681908	0.0446046	0.0332314	BP
GO:0050729	MF	positive regulation of inflammatory response	71/7844	133/18493	0.00683172	0.0446414	0.0332588	BP
GO:0023058	MF	adaptation of signaling pathway	15/7844	21/18493	0.00687016	0.0446631	0.0332749	BP
GO:0032332	MF	positive regulation of chondrocyte differentiation	15/7844	21/18493	0.00687016	0.0446631	0.0332749	BP
GO:0035809	MF	regulation of urine volume	15/7844	21/18493	0.00687016	0.0446631	0.0332749	BP
GO:0060390	MF	regulation of SMAD protein signal transduction	15/7844	21/18493	0.00687016	0.0446631	0.0332749	BP
GO:0061339	MF	establishment or maintenance of monopolar cell polarity	15/7844	21/18493	0.00687016	0.0446631	0.0332749	BP
GO:0014902	MF	myotube differentiation	59/7844	108/18493	0.00688823	0.0447348	0.0333283	BP
GO:0032609	MF	interferon-gamma production	58/7844	106/18493	0.00701885	0.0454902	0.0338911	BP
GO:0050868	MF	negative regulation of T cell activation	58/7844	106/18493	0.00701885	0.0454902	0.0338911	BP
GO:0031528	MF	microvillus membrane	16/8443	23/19659	0.00904944	0.0454246	0.0345541	CC
GO:0034706	MF	sodium channel complex	16/8443	23/19659	0.00904944	0.0454246	0.0345541	CC
GO:0043900	MF	regulation of multi-organism process	181/7844	371/18493	0.00724076	0.0467633	0.0348396	BP
GO:0042133	MF	neurotransmitter metabolic process	78/7844	148/18493	0.00724292	0.0467633	0.0348396	BP
GO:0031641	MF	regulation of myelination	22/7844	34/18493	0.00724471	0.0467633	0.0348396	BP
GO:0071634	MF	regulation of transforming growth factor beta production	22/7844	34/18493	0.00724471	0.0467633	0.0348396	BP
GO:0042136	MF	neurotransmitter biosynthetic process	56/7844	102/18493	0.00728073	0.0469482	0.0349774	BP
GO:0060205	MF	cytoplasmic vesicle lumen	167/8443	338/19659	0.00922903	0.0460253	0.035011	CC
GO:0007051	MF	spindle organization	86/7844	165/18493	0.00731741	0.0471369	0.035118	BP
GO:0000077	MF	DNA damage checkpoint	77/7844	146/18493	0.00742168	0.0477119	0.0355463	BP
GO:0051592	MF	response to calcium ion	77/7844	146/18493	0.00742168	0.0477119	0.0355463	BP
GO:0032391	MF	photoreceptor connecting cilium	24/8443	38/19659	0.00954239	0.047281	0.0359662	CC
GO:0030667	MF	secretory granule membrane	147/8443	295/19659	0.00969228	0.0477158	0.036297	CC
GO:0003417	MF	growth plate cartilage development	23/7844	36/18493	0.0076211	0.0488457	0.0363911	BP
GO:0071604	MF	transforming growth factor beta production	23/7844	36/18493	0.0076211	0.0488457	0.0363911	BP
GO:1900271	MF	regulation of long-term synaptic potentiation	23/7844	36/18493	0.0076211	0.0488457	0.0363911	BP
GO:0032675	MF	regulation of interleukin-6 production	66/7844	123/18493	0.00764364	0.0489409	0.036462	BP
GO:0009266	MF	response to temperature stimulus	106/7844	208/18493	0.00765368	0.0489558	0.0364731	BP
GO:0042472		inner ear morphogenesis	53/7844	96/18493	0.00767162	0.048972	0.0364852	BP
GO:0099175		regulation of postsynapse organization	53/7844	96/18493	0.00767162	0.048972	0.0364852	BP
GO:0042035		regulation of cytokine biosynthetic process	52/7844	94/18493	0.00780027	0.0495651	0.036927	BP
GO:0045621		positive regulation of lymphocyte differentiation	52/7844	94/18493	0.00780027	0.0495651	0.036927	BP
GO:0003272		endocardial cushion formation	16/7844	23/18493	0.00784653	0.0495651	0.036927	BP
GO:0006688		glycosphingolipid biosynthetic process	16/7844	23/18493	0.00784653	0.0495651	0.036927	BP
GO:0010529		negative regulation of transposition	16/7844	23/18493	0.00784653	0.0495651	0.036927	BP
GO:0032753		positive regulation of interleukin-4 production	16/7844	23/18493	0.00784653	0.0495651	0.036927	BP
GO:0034505		tooth mineralization	16/7844	23/18493	0.00784653	0.0495651	0.036927	BP
GO:0051412		response to corticosterone	16/7844	23/18493	0.00784653	0.0495651	0.036927	BP
GO:0090189		regulation of branching involved in ureteric bud morphogenesis	16/7844	23/18493	0.00784653	0.0495651	0.036927	BP
GO:1904031		positive regulation of cyclin-dependent protein kinase activity	16/7844	23/18493	0.00784653	0.0495651	0.036927	BP
GO:0055001		muscle cell development	91/7844	176/18493	0.00785027	0.0495651	0.036927	BP
GO:0032994		protein-lipid complex	25/8443	40/19659	0.00992374	0.0485441	0.0369271	CC
GO:0051403		stress-activated MAPK cascade	141/7844	284/18493	0.00789563	0.0497641	0.0370753	BP
GO:1901991		negative regulation of mitotic cell cycle phase transition	98/7844	191/18493	0.00789746	0.0497641	0.0370753	BP
GO:0002177		manchette	9/8443	11/19659	0.0103127	0.0488899	0.0371901	CC
GO:0034992		microtubule organizing center attachment site	9/8443	11/19659	0.0103127	0.0488899	0.0371901	CC
GO:0034993		meiotic nuclear membrane microtubule tethering complex	9/8443	11/19659	0.0103127	0.0488899	0.0371901	CC
GO:0106083		nuclear membrane protein complex	9/8443	11/19659	0.0103127	0.0488899	0.0371901	CC
GO:0106094		nuclear membrane microtubule tethering complex	9/8443	11/19659	0.0103127	0.0488899	0.0371901	CC
GO:0008017		microtubule binding	130/7872	240/17632	0.00179367	0.0423613	0.0372211	MF
GO:0008066		glutamate receptor activity	20/7872	27/17632	0.00186277	0.0423613	0.0372211	MF
GO:0033764		steroid dehydrogenase activity, acting on the CH-OH group of donors, NAD or NADP as acceptor	20/7872	27/17632	0.00186277	0.0423613	0.0372211	MF
GO:0015276		ligand-gated ion channel activity	82/7872	144/17632	0.00194387	0.0423613	0.0372211	MF
GO:0022834		ligand-gated channel activity	82/7872	144/17632	0.00194387	0.0423613	0.0372211	MF
GO:0031432		titin binding	12/7872	14/17632	0.00197138	0.0423613	0.0372211	MF
GO:0015081		sodium ion transmembrane transporter activity	85/7872	150/17632	0.00197547	0.0423613	0.0372211	MF
GO:0005221		intracellular cyclic nucleotide activated cation channel activity	10/7872	11/17632	0.00205088	0.0423613	0.0372211	MF
GO:0043855		cyclic nucleotide-gated ion channel activity	10/7872	11/17632	0.00205088	0.0423613	0.0372211	MF
GO:0048407		platelet-derived growth factor binding	10/7872	11/17632	0.00205088	0.0423613	0.0372211	MF
GO:1903900		regulation of viral life cycle	74/7844	140/18493	0.00798188	0.0502463	0.0374346	BP
GO:0045069		regulation of viral genome replication	50/7844	90/18493	0.00805307	0.0506443	0.0377311	BP
GO:0045931		positive regulation of mitotic cell cycle	82/7844	157/18493	0.00810127	0.0508971	0.0379194	BP
GO:0061001		regulation of dendritic spine morphogenesis	25/7844	40/18493	0.00823659	0.0516962	0.0385148	BP
GO:0060249		anatomical structure homeostasis	205/7844	425/18493	0.00826592	0.0518291	0.0386138	BP
GO:0001708		cell fate specification	47/7844	84/18493	0.00841467	0.0526579	0.0392312	BP
GO:1903035		negative regulation of response to wounding	47/7844	84/18493	0.00841467	0.0526579	0.0392312	BP
GO:0060538		skeletal muscle organ development	88/7844	170/18493	0.00849059	0.0530808	0.0395463	BP
GO:0097431		mitotic spindle pole	18/8443	27/19659	0.0110598	0.05211	0.0396396	CC
GO:0032930		positive regulation of superoxide anion generation	12/7844	16/18493	0.00856816	0.0533559	0.0397513	BP
GO:0042772		DNA damage response, signal transduction resulting in transcription	12/7844	16/18493	0.00856816	0.0533559	0.0397513	BP
GO:0045072		regulation of interferon-gamma biosynthetic process	12/7844	16/18493	0.00856816	0.0533559	0.0397513	BP
GO:0060046		regulation of acrosome reaction	12/7844	16/18493	0.00856816	0.0533559	0.0397513	BP
GO:0031098		stress-activated protein kinase signaling cascade	154/7844	313/18493	0.00861295	0.0535823	0.0399199	BP
GO:0007254		JNK cascade	108/7844	213/18493	0.0086496	0.0537577	0.0400506	BP
GO:0044060		regulation of endocrine process	27/7844	44/18493	0.00868866	0.053872	0.0401357	BP
GO:0021987		cerebral cortex development	60/7844	111/18493	0.0087024	0.053872	0.0401357	BP
GO:0008211		glucocorticoid metabolic process	17/7844	25/18493	0.00872729	0.053872	0.0401357	BP
GO:0032461		positive regulation of protein oligomerization	17/7844	25/18493	0.00872729	0.053872	0.0401357	BP
GO:0045724		positive regulation of cilium assembly	17/7844	25/18493	0.00872729	0.053872	0.0401357	BP
GO:0050927		positive regulation of positive chemotaxis	17/7844	25/18493	0.00872729	0.053872	0.0401357	BP
GO:0085029		extracellular matrix assembly	17/7844	25/18493	0.00872729	0.053872	0.0401357	BP
GO:0008589		regulation of smoothened signaling pathway	44/7844	78/18493	0.00874256	0.0539138	0.0401669	BP
GO:0016528		sarcoplasm	43/8443	76/19659	0.0113902	0.0533043	0.0405481	CC
GO:0099146		intrinsic component of postsynaptic density membrane	32/8443	54/19659	0.0114521	0.0533043	0.0405481	CC
GO:0070509		calcium ion import	43/7844	76/18493	0.00884136	0.0544703	0.0405815	BP
GO:0046916		cellular transition metal ion homeostasis	59/7844	109/18493	0.00888672	0.0546475	0.0407135	BP
GO:1901988		negative regulation of cell cycle phase transition	107/7844	211/18493	0.0088873	0.0546475	0.0407135	BP
GO:0043236		laminin binding	21/7872	29/17632	0.0022952	0.0465665	0.040916	MF
GO:0015291		secondary active transmembrane transporter activity	121/7872	223/17632	0.00233221	0.0465665	0.040916	MF
GO:0005859		muscle myosin complex	13/8443	18/19659	0.0116268	0.0537916	0.0409188	CC
GO:0070302		regulation of stress-activated protein kinase signaling cascade	119/7844	237/18493	0.00897905	0.055081	0.0410365	BP
GO:1903531		negative regulation of secretion by cell	100/7844	196/18493	0.00899438	0.055081	0.0410365	BP
GO:0009581		detection of external stimulus	69/7844	130/18493	0.00899804	0.055081	0.0410365	BP
GO:0050921		positive regulation of chemotaxis	69/7844	130/18493	0.00899804	0.055081	0.0410365	BP
GO:0043525		positive regulation of neuron apoptotic process	29/7844	48/18493	0.00900112	0.055081	0.0410365	BP
GO:0048844		artery morphogenesis	41/7844	72/18493	0.00901848	0.0551342	0.0410761	BP
GO:0031623		receptor internalization	58/7844	107/18493	0.00907296	0.0553607	0.0412449	BP
GO:0044774		mitotic DNA integrity checkpoint	58/7844	107/18493	0.00907296	0.0553607	0.0412449	BP
GO:0060193		positive regulation of lipase activity	40/7844	70/18493	0.00909496	0.0553887	0.0412657	BP
GO:1901224		positive regulation of NIK/NF-kappaB signaling	40/7844	70/18493	0.00909496	0.0553887	0.0412657	BP
GO:0001954		positive regulation of cell-matrix adhesion	30/7844	50/18493	0.00911204	0.0554396	0.0413036	BP
GO:1901607		alpha-amino acid biosynthetic process	39/7844	68/18493	0.00916201	0.0556766	0.0414803	BP
GO:0071320		cellular response to cAMP	31/7844	52/18493	0.00919623	0.0556766	0.0414803	BP
GO:0046513		ceramide biosynthetic process	32/7844	54/18493	0.00925608	0.0556766	0.0414803	BP
GO:0060997		dendritic spine morphogenesis	32/7844	54/18493	0.00925608	0.0556766	0.0414803	BP
GO:0042089		cytokine biosynthetic process	57/7844	105/18493	0.00926095	0.0556766	0.0414803	BP
GO:0061371		determination of heart left/right asymmetry	37/7844	64/18493	0.0092631	0.0556766	0.0414803	BP
GO:0086002		cardiac muscle cell action potential involved in contraction	33/7844	56/18493	0.00929384	0.0556766	0.0414803	BP
GO:0003407		neural retina development	35/7844	60/18493	0.00931121	0.0556766	0.0414803	BP
GO:0010518		positive regulation of phospholipase activity	34/7844	58/18493	0.00931158	0.0556766	0.0414803	BP
GO:0000050		urea cycle	9/7844	11/18493	0.00936117	0.0556766	0.0414803	BP
GO:0002003		angiotensin maturation	9/7844	11/18493	0.00936117	0.0556766	0.0414803	BP
GO:0016322		neuron remodeling	9/7844	11/18493	0.00936117	0.0556766	0.0414803	BP
GO:0021521		ventral spinal cord interneuron specification	9/7844	11/18493	0.00936117	0.0556766	0.0414803	BP
GO:0021561		facial nerve development	9/7844	11/18493	0.00936117	0.0556766	0.0414803	BP
GO:0021610		facial nerve morphogenesis	9/7844	11/18493	0.00936117	0.0556766	0.0414803	BP
GO:0030241		skeletal muscle myosin thick filament assembly	9/7844	11/18493	0.00936117	0.0556766	0.0414803	BP
GO:0033629		negative regulation of cell adhesion mediated by integrin	9/7844	11/18493	0.00936117	0.0556766	0.0414803	BP
GO:0042535		positive regulation of tumor necrosis factor biosynthetic process	9/7844	11/18493	0.00936117	0.0556766	0.0414803	BP
GO:0043301		negative regulation of leukocyte degranulation	9/7844	11/18493	0.00936117	0.0556766	0.0414803	BP
GO:0045953		negative regulation of natural killer cell mediated cytotoxicity	9/7844	11/18493	0.00936117	0.0556766	0.0414803	BP
GO:0060573		cell fate specification involved in pattern specification	9/7844	11/18493	0.00936117	0.0556766	0.0414803	BP
GO:0071281		cellular response to iron ion	9/7844	11/18493	0.00936117	0.0556766	0.0414803	BP
GO:0071688		striated muscle myosin thick filament assembly	9/7844	11/18493	0.00936117	0.0556766	0.0414803	BP
GO:0090520		sphingolipid mediated signaling pathway	9/7844	11/18493	0.00936117	0.0556766	0.0414803	BP
GO:0034614		cellular response to reactive oxygen species	84/7844	162/18493	0.00942524	0.055922	0.0416631	BP
GO:0051302		regulation of cell division	84/7844	162/18493	0.00942524	0.055922	0.0416631	BP
GO:0035148		tube formation	76/7844	145/18493	0.00942882	0.055922	0.0416631	BP
GO:0050803		regulation of synapse structure or activity	111/7844	220/18493	0.0094607	0.0560067	0.0417261	BP
GO:0051054		positive regulation of DNA metabolic process	111/7844	220/18493	0.0094607	0.0560067	0.0417261	BP
GO:0003148		outflow tract septum morphogenesis	18/7844	27/18493	0.00951158	0.056151	0.0418337	BP
GO:0032673		regulation of interleukin-4 production	18/7844	27/18493	0.00951158	0.056151	0.0418337	BP
GO:0072207		metanephric epithelium development	18/7844	27/18493	0.00951158	0.056151	0.0418337	BP
GO:0051213		dioxygenase activity	55/7872	92/17632	0.00244034	0.0479267	0.0421111	MF
GO:0005248		voltage-gated sodium channel activity	15/7872	19/17632	0.00249285	0.0481683	0.0423234	MF
GO:0046632		alpha-beta T cell differentiation	55/7844	101/18493	0.00964139	0.0568646	0.0423653	BP
GO:0015103		inorganic anion transmembrane transporter activity	88/7872	157/17632	0.00257479	0.0489619	0.0430208	MF
GO:0006631		fatty acid metabolic process	179/7844	369/18493	0.00990171	0.0583221	0.0434512	BP
GO:0090276		regulation of peptide hormone secretion	103/7844	203/18493	0.00990687	0.0583221	0.0434512	BP
GO:0015108		chloride transmembrane transporter activity	59/7872	100/17632	0.00266617	0.0499075	0.0438516	MF
GO:0034101		erythrocyte homeostasis	64/7844	120/18493	0.0101206	0.0595251	0.0443474	BP
GO:0010644		cell communication by electrical coupling	19/7844	29/18493	0.0102021	0.0597285	0.044499	BP
GO:0014044		Schwann cell development	19/7844	29/18493	0.0102021	0.0597285	0.044499	BP
GO:0016056		rhodopsin mediated signaling pathway	19/7844	29/18493	0.0102021	0.0597285	0.044499	BP
GO:0021799		cerebral cortex radially oriented cell migration	19/7844	29/18493	0.0102021	0.0597285	0.044499	BP
GO:0060536		cartilage morphogenesis	19/7844	29/18493	0.0102021	0.0597285	0.044499	BP
GO:0050807		regulation of synapse organization	108/7844	214/18493	0.0102678	0.0597973	0.0445502	BP
GO:0007625		grooming behavior	13/7844	18/18493	0.0102891	0.0597973	0.0445502	BP
GO:0010544		negative regulation of platelet activation	13/7844	18/18493	0.0102891	0.0597973	0.0445502	BP
GO:0010766		negative regulation of sodium ion transport	13/7844	18/18493	0.0102891	0.0597973	0.0445502	BP
GO:0031342		negative regulation of cell killing	13/7844	18/18493	0.0102891	0.0597973	0.0445502	BP
GO:0035089		establishment of apical/basal cell polarity	13/7844	18/18493	0.0102891	0.0597973	0.0445502	BP
GO:0060749		mammary gland alveolus development	13/7844	18/18493	0.0102891	0.0597973	0.0445502	BP
GO:0061377		mammary gland lobule development	13/7844	18/18493	0.0102891	0.0597973	0.0445502	BP
GO:0032970		regulation of actin filament-based process	182/7844	376/18493	0.010386	0.0603054	0.0449288	BP
GO:0055067		monovalent inorganic cation homeostasis	72/7844	137/18493	0.0104246	0.0604744	0.0450547	BP
GO:0046328		regulation of JNK cascade	94/7844	184/18493	0.0105745	0.0612878	0.0456607	BP
GO:0005884		actin filament	54/8443	99/19659	0.0130703	0.0601077	0.0457234	CC
GO:0021772		olfactory bulb development	20/7844	31/18493	0.0108038	0.0623892	0.0464812	BP
GO:0033363		secretory granule organization	20/7844	31/18493	0.0108038	0.0623892	0.0464812	BP
GO:0051482		positive regulation of cytosolic calcium ion concentration involved in phospholipase C-activating G protein-coupled signaling pathway	20/7844	31/18493	0.0108038	0.0623892	0.0464812	BP
GO:0051968		positive regulation of synaptic transmission, glutamatergic	20/7844	31/18493	0.0108038	0.0623892	0.0464812	BP
GO:0060070		canonical Wnt signaling pathway	140/7844	284/18493	0.0108998	0.0628867	0.0468519	BP
GO:0030139		endocytic vesicle	145/8443	293/19659	0.0135084	0.0617529	0.0469749	CC
GO:0032612		interleukin-1 production	48/7844	87/18493	0.0109912	0.063299	0.0471591	BP
GO:0035710		CD4-positive, alpha-beta T cell activation	48/7844	87/18493	0.0109912	0.063299	0.0471591	BP
GO:0030217		T cell differentiation	117/7844	234/18493	0.0111451	0.0641272	0.0477761	BP
GO:0002028		regulation of sodium ion transport	47/7844	85/18493	0.0111814	0.0642777	0.0478882	BP
GO:0044843		cell cycle G1/S phase transition	139/7844	282/18493	0.0111998	0.0643258	0.047924	BP
GO:0042581		specific granule	83/8443	160/19659	0.0138801	0.0630177	0.047937	CC
GO:0033391		chromatoid body	10/8443	13/19659	0.0139492	0.0630177	0.047937	CC
GO:0050777		negative regulation of immune response	69/7844	131/18493	0.0112343	0.0644653	0.048028	BP
GO:0031128		developmental induction	21/7844	33/18493	0.0113225	0.0648543	0.0483178	BP
GO:0036003		positive regulation of transcription from RNA polymerase II promoter in response to stress	21/7844	33/18493	0.0113225	0.0648543	0.0483178	BP
GO:0009101		glycoprotein biosynthetic process	159/7844	326/18493	0.0113786	0.0651172	0.0485137	BP
GO:0004714		transmembrane receptor protein tyrosine kinase activity	40/7872	64/17632	0.00301149	0.0555041	0.0487691	MF
GO:0035051		cardiocyte differentiation	84/7844	163/18493	0.0114657	0.0655565	0.048841	BP
GO:0097756		negative regulation of blood vessel diameter	45/7844	81/18493	0.0115546	0.0660053	0.0491753	BP
GO:0007565		female pregnancy	97/7844	191/18493	0.0116656	0.0665799	0.0496034	BP
GO:0055117		regulation of cardiac muscle contraction	44/7844	79/18493	0.0117362	0.0669228	0.0498589	BP
GO:0051385		response to mineralocorticoid	22/7844	35/18493	0.0117645	0.0669437	0.0498745	BP
GO:0006346		methylation-dependent chromatin silencing	14/7844	20/18493	0.0118241	0.0669437	0.0498745	BP
GO:0019370		leukotriene biosynthetic process	14/7844	20/18493	0.0118241	0.0669437	0.0498745	BP
GO:0030903		notochord development	14/7844	20/18493	0.0118241	0.0669437	0.0498745	BP
GO:0042474		middle ear morphogenesis	14/7844	20/18493	0.0118241	0.0669437	0.0498745	BP
GO:0061162		establishment of monopolar cell polarity	14/7844	20/18493	0.0118241	0.0669437	0.0498745	BP
GO:2000310		regulation of NMDA receptor activity	14/7844	20/18493	0.0118241	0.0669437	0.0498745	BP
GO:2000738		positive regulation of stem cell differentiation	14/7844	20/18493	0.0118241	0.0669437	0.0498745	BP
GO:0042107		cytokine metabolic process	57/7844	106/18493	0.0118691	0.0671386	0.0500196	BP
GO:0019827		stem cell population maintenance	75/7844	144/18493	0.0119134	0.0672704	0.0501179	BP
GO:0032652		regulation of interleukin-1 production	43/7844	77/18493	0.0119136	0.0672704	0.0501179	BP
GO:1904951		positive regulation of establishment of protein localization	209/7844	437/18493	0.0119433	0.0673783	0.0501982	BP
GO:0051015		actin filament binding	104/7872	190/17632	0.00315905	0.057212	0.0502697	MF
GO:0005217		intracellular ligand-gated ion channel activity	23/7872	33/17632	0.00319967	0.057212	0.0502697	MF
GO:0007568		aging	152/7844	311/18493	0.0119963	0.0676174	0.0503764	BP
GO:0016054		organic acid catabolic process	131/7844	265/18493	0.0120338	0.0677088	0.0504445	BP
GO:0046395		carboxylic acid catabolic process	131/7844	265/18493	0.0120338	0.0677088	0.0504445	BP
GO:0050000		chromosome localization	42/7844	75/18493	0.0120857	0.0679408	0.0506173	BP
GO:2001237		negative regulation of extrinsic apoptotic signaling pathway	56/7844	104/18493	0.0121347	0.0679855	0.0506506	BP
GO:0014037		Schwann cell differentiation	23/7844	37/18493	0.0121365	0.0679855	0.0506506	BP
GO:1901021		positive regulation of calcium ion transmembrane transporter activity	23/7844	37/18493	0.0121365	0.0679855	0.0506506	BP
GO:2000273		positive regulation of signaling receptor activity	23/7844	37/18493	0.0121365	0.0679855	0.0506506	BP
GO:0016311		dephosphorylation	226/7844	475/18493	0.0121624	0.068071	0.0507143	BP
GO:0006081		cellular aldehyde metabolic process	41/7844	73/18493	0.0122517	0.0685104	0.0510417	BP
GO:0000082		G1/S transition of mitotic cell cycle	130/7844	263/18493	0.012367	0.0690941	0.0514766	BP
GO:0006493		protein O-linked glycosylation	55/7844	102/18493	0.0124039	0.0692395	0.0515849	BP
GO:0009072		aromatic amino acid family metabolic process	24/7844	39/18493	0.0124445	0.0693446	0.0516631	BP
GO:0098815		modulation of excitatory postsynaptic potential	24/7844	39/18493	0.0124445	0.0693446	0.0516631	BP
GO:0046330		positive regulation of JNK cascade	73/7844	140/18493	0.0125476	0.0693833	0.051692	BP
GO:0006801		superoxide metabolic process	39/7844	69/18493	0.0125607	0.0693833	0.051692	BP
GO:0001967		suckling behavior	10/7844	13/18493	0.0126042	0.0693833	0.051692	BP
GO:0002693		positive regulation of cellular extravasation	10/7844	13/18493	0.0126042	0.0693833	0.051692	BP
GO:0003188		heart valve formation	10/7844	13/18493	0.0126042	0.0693833	0.051692	BP
GO:0021681		cerebellar granular layer development	10/7844	13/18493	0.0126042	0.0693833	0.051692	BP
GO:0021978		telencephalon regionalization	10/7844	13/18493	0.0126042	0.0693833	0.051692	BP
GO:0031033		myosin filament organization	10/7844	13/18493	0.0126042	0.0693833	0.051692	BP
GO:0032530		regulation of microvillus organization	10/7844	13/18493	0.0126042	0.0693833	0.051692	BP
GO:0044849		estrous cycle	10/7844	13/18493	0.0126042	0.0693833	0.051692	BP
GO:0060712		spongiotrophoblast layer development	10/7844	13/18493	0.0126042	0.0693833	0.051692	BP
GO:1900452		regulation of long-term synaptic depression	10/7844	13/18493	0.0126042	0.0693833	0.051692	BP
GO:1901678		iron coordination entity transport	10/7844	13/18493	0.0126042	0.0693833	0.051692	BP
GO:1903960		negative regulation of anion transmembrane transport	10/7844	13/18493	0.0126042	0.0693833	0.051692	BP
GO:0032102		negative regulation of response to external stimulus	160/7844	329/18493	0.0126449	0.0695463	0.0518134	BP
GO:0003009		skeletal muscle contraction	25/7844	41/18493	0.0126947	0.0695463	0.0518134	BP
GO:0060999		positive regulation of dendritic spine development	25/7844	41/18493	0.0126947	0.0695463	0.0518134	BP
GO:0071230		cellular response to amino acid stimulus	38/7844	67/18493	0.0127012	0.0695463	0.0518134	BP
GO:0086003		cardiac muscle cell contraction	38/7844	67/18493	0.0127012	0.0695463	0.0518134	BP
GO:0002687		positive regulation of leukocyte migration	64/7844	121/18493	0.0127104	0.0695463	0.0518134	BP
GO:1900180		regulation of protein localization to nucleus	64/7844	121/18493	0.0127104	0.0695463	0.0518134	BP
GO:0061572		actin filament bundle organization	80/7844	155/18493	0.012756	0.0697358	0.0519546	BP
GO:0004602		glutathione peroxidase activity	16/7872	21/17632	0.00337165	0.0594006	0.0521928	MF
GO:0042246		tissue regeneration	37/7844	65/18493	0.0128304	0.0700824	0.0522128	BP
GO:0003416		endochondral bone growth	26/7844	43/18493	0.0128925	0.0701803	0.0522858	BP
GO:0021795		cerebral cortex cell migration	26/7844	43/18493	0.0128925	0.0701803	0.0522858	BP
GO:0042771		intrinsic apoptotic signaling pathway in response to DNA damage by p53 class mediator	26/7844	43/18493	0.0128925	0.0701803	0.0522858	BP
GO:0071548		response to dexamethasone	26/7844	43/18493	0.0128925	0.0701803	0.0522858	BP
GO:0032729		positive regulation of interferon-gamma production	36/7844	63/18493	0.0129468	0.0704155	0.052461	BP
GO:0014075		response to amine	27/7844	45/18493	0.0130433	0.0705262	0.0525435	BP
GO:0048599		oocyte development	27/7844	45/18493	0.0130433	0.0705262	0.0525435	BP
GO:0060412		ventricular septum morphogenesis	27/7844	45/18493	0.0130433	0.0705262	0.0525435	BP
GO:0098868		bone growth	27/7844	45/18493	0.0130433	0.0705262	0.0525435	BP
GO:0032872		regulation of stress-activated MAPK cascade	117/7844	235/18493	0.0130466	0.0705262	0.0525435	BP
GO:0140056		organelle localization by membrane tethering	86/7844	168/18493	0.0131308	0.0705262	0.0525435	BP
GO:0002294		CD4-positive, alpha-beta T cell differentiation involved in immune response	34/7844	59/18493	0.0131335	0.0705262	0.0525435	BP
GO:0032370		positive regulation of lipid transport	34/7844	59/18493	0.0131335	0.0705262	0.0525435	BP
GO:0006953		acute-phase response	28/7844	47/18493	0.0131517	0.0705262	0.0525435	BP
GO:0055010		ventricular cardiac muscle tissue morphogenesis	28/7844	47/18493	0.0131517	0.0705262	0.0525435	BP
GO:0090199		regulation of release of cytochrome c from mitochondria	28/7844	47/18493	0.0131517	0.0705262	0.0525435	BP
GO:0001759		organ induction	15/7844	22/18493	0.0131699	0.0705262	0.0525435	BP
GO:0021513		spinal cord dorsal/ventral patterning	15/7844	22/18493	0.0131699	0.0705262	0.0525435	BP
GO:0035812		renal sodium excretion	15/7844	22/18493	0.0131699	0.0705262	0.0525435	BP
GO:0035929		steroid hormone secretion	15/7844	22/18493	0.0131699	0.0705262	0.0525435	BP
GO:0061213		positive regulation of mesonephros development	15/7844	22/18493	0.0131699	0.0705262	0.0525435	BP
GO:0097150		neuronal stem cell population maintenance	15/7844	22/18493	0.0131699	0.0705262	0.0525435	BP
GO:1905809		negative regulation of synapse organization	15/7844	22/18493	0.0131699	0.0705262	0.0525435	BP
GO:0042093		T-helper cell differentiation	33/7844	57/18493	0.0131996	0.0705262	0.0525435	BP
GO:0042108		positive regulation of cytokine biosynthetic process	33/7844	57/18493	0.0131996	0.0705262	0.0525435	BP
GO:0003044		regulation of systemic arterial blood pressure mediated by a chemical signal	29/7844	49/18493	0.0132223	0.0705262	0.0525435	BP
GO:0060324		face development	29/7844	49/18493	0.0132223	0.0705262	0.0525435	BP
GO:0086009		membrane repolarization	29/7844	49/18493	0.0132223	0.0705262	0.0525435	BP
GO:0010043		response to zinc ion	32/7844	55/18493	0.0132444	0.0705674	0.0525742	BP
GO:0032722		positive regulation of chemokine production	31/7844	53/18493	0.0132651	0.0705674	0.0525742	BP
GO:0043954		cellular component maintenance	31/7844	53/18493	0.0132651	0.0705674	0.0525742	BP
GO:0045930		negative regulation of mitotic cell cycle	138/7844	281/18493	0.0132744	0.0705674	0.0525742	BP
GO:0060840		artery development	51/7844	94/18493	0.0135123	0.0717721	0.0534717	BP
GO:0016529		sarcoplasmic reticulum	38/8443	67/19659	0.0159383	0.0715827	0.0544523	CC
GO:0008307		structural constituent of muscle	29/7872	44/17632	0.00360491	0.0625896	0.0549949	MF
GO:0005227		calcium activated cation channel activity	20/7872	28/17632	0.00378942	0.0630073	0.0553618	MF
GO:0071813		lipoprotein particle binding	20/7872	28/17632	0.00378942	0.0630073	0.0553618	MF
GO:0071814		protein-lipid complex binding	20/7872	28/17632	0.00378942	0.0630073	0.0553618	MF
GO:0042277		peptide binding	150/7872	285/17632	0.00383934	0.0630073	0.0553618	MF
GO:0051056		regulation of small GTPase mediated signal transduction	156/7844	321/18493	0.0140669	0.0746554	0.0556198	BP
GO:0009308		amine metabolic process	49/7844	90/18493	0.0140817	0.0746718	0.0556321	BP
GO:0043524		negative regulation of neuron apoptotic process	76/7844	147/18493	0.0141918	0.0751916	0.0560193	BP
GO:0042180		cellular ketone metabolic process	96/7844	190/18493	0.0142726	0.0751916	0.0560193	BP
GO:0006643		membrane lipid metabolic process	102/7844	203/18493	0.0143169	0.0751916	0.0560193	BP
GO:0050679		positive regulation of epithelial cell proliferation	102/7844	203/18493	0.0143169	0.0751916	0.0560193	BP
GO:0010528		regulation of transposition	16/7844	24/18493	0.0143338	0.0751916	0.0560193	BP
GO:0030878		thyroid gland development	16/7844	24/18493	0.0143338	0.0751916	0.0560193	BP
GO:0031639		plasminogen activation	16/7844	24/18493	0.0143338	0.0751916	0.0560193	BP
GO:0032897		negative regulation of viral transcription	16/7844	24/18493	0.0143338	0.0751916	0.0560193	BP
GO:0034110		regulation of homotypic cell-cell adhesion	16/7844	24/18493	0.0143338	0.0751916	0.0560193	BP
GO:0044062		regulation of excretion	16/7844	24/18493	0.0143338	0.0751916	0.0560193	BP
GO:0071378		cellular response to growth hormone stimulus	16/7844	24/18493	0.0143338	0.0751916	0.0560193	BP
GO:1900120		regulation of receptor binding	16/7844	24/18493	0.0143338	0.0751916	0.0560193	BP
GO:0043200		response to amino acid	59/7844	111/18493	0.0143524	0.0751916	0.0560193	BP
GO:0001776		leukocyte homeostasis	48/7844	88/18493	0.0143689	0.0751916	0.0560193	BP
GO:0015844		monoamine transport	48/7844	88/18493	0.0143689	0.0751916	0.0560193	BP
GO:1904894		positive regulation of STAT cascade	48/7844	88/18493	0.0143689	0.0751916	0.0560193	BP
GO:0070507		regulation of microtubule cytoskeleton organization	89/7844	175/18493	0.014521	0.0759249	0.0565656	BP
GO:0046332		SMAD binding	48/7872	80/17632	0.0040417	0.0649119	0.0570353	MF
GO:0030020		extracellular matrix structural constituent conferring tensile strength	25/7872	37/17632	0.00411482	0.0649119	0.0570353	MF
GO:0035326		enhancer binding	75/7872	133/17632	0.00415979	0.0649119	0.0570353	MF
GO:0003796		lysozyme activity	9/7872	10/17632	0.00420699	0.0649119	0.0570353	MF
GO:0005245		voltage-gated calcium channel activity	31/7872	48/17632	0.00422632	0.0649119	0.0570353	MF
GO:0003333		amino acid transmembrane transport	47/7844	86/18493	0.0146573	0.0765743	0.0570494	BP
GO:0001649		osteoblast differentiation	107/7844	214/18493	0.0146782	0.0766204	0.0570838	BP
GO:1901215		negative regulation of neuron death	101/7844	201/18493	0.0147183	0.0767668	0.0571929	BP
GO:0071496		cellular response to external stimulus	159/7844	328/18493	0.0147808	0.0770296	0.0573887	BP
GO:0048167		regulation of synaptic plasticity	88/7844	173/18493	0.0149253	0.0777002	0.0578883	BP
GO:0008625		extrinsic apoptotic signaling pathway via death domain receptors	46/7844	84/18493	0.0149461	0.0777002	0.0578883	BP
GO:0032465		regulation of cytokinesis	46/7844	84/18493	0.0149461	0.0777002	0.0578883	BP
GO:0051668		localization within membrane	74/7844	143/18493	0.0149692	0.0777569	0.0579305	BP
GO:0009798		axis specification	45/7844	82/18493	0.0152349	0.0789923	0.0588509	BP
GO:0048864		stem cell development	45/7844	82/18493	0.0152349	0.0789923	0.0588509	BP
GO:0002479		antigen processing and presentation of exogenous peptide antigen via MHC class I, TAP-dependent	17/7844	26/18493	0.0153285	0.0789923	0.0588509	BP
GO:0003081		regulation of systemic arterial blood pressure by renin-angiotensin	17/7844	26/18493	0.0153285	0.0789923	0.0588509	BP
GO:0022011		myelination in peripheral nervous system	17/7844	26/18493	0.0153285	0.0789923	0.0588509	BP
GO:0032292		peripheral nervous system axon ensheathment	17/7844	26/18493	0.0153285	0.0789923	0.0588509	BP
GO:0061217		regulation of mesonephros development	17/7844	26/18493	0.0153285	0.0789923	0.0588509	BP
GO:0072202		cell differentiation involved in metanephros development	17/7844	26/18493	0.0153285	0.0789923	0.0588509	BP
GO:1903959		regulation of anion transmembrane transport	17/7844	26/18493	0.0153285	0.0789923	0.0588509	BP
GO:1990748		cellular detoxification	56/7844	105/18493	0.015419	0.0789923	0.0588509	BP
GO:0002070		epithelial cell maturation	11/7844	15/18493	0.015468	0.0789923	0.0588509	BP
GO:0006837		serotonin transport	11/7844	15/18493	0.015468	0.0789923	0.0588509	BP
GO:0006978		DNA damage response, signal transduction by p53 class mediator resulting in transcription of p21 class mediator	11/7844	15/18493	0.015468	0.0789923	0.0588509	BP
GO:0007216		G protein-coupled glutamate receptor signaling pathway	11/7844	15/18493	0.015468	0.0789923	0.0588509	BP
GO:0034616		response to laminar fluid shear stress	11/7844	15/18493	0.015468	0.0789923	0.0588509	BP
GO:0046184		aldehyde biosynthetic process	11/7844	15/18493	0.015468	0.0789923	0.0588509	BP
GO:0060579		ventral spinal cord interneuron fate commitment	11/7844	15/18493	0.015468	0.0789923	0.0588509	BP
GO:0060581		cell fate commitment involved in pattern specification	11/7844	15/18493	0.015468	0.0789923	0.0588509	BP
GO:0060766		negative regulation of androgen receptor signaling pathway	11/7844	15/18493	0.015468	0.0789923	0.0588509	BP
GO:0060841		venous blood vessel development	11/7844	15/18493	0.015468	0.0789923	0.0588509	BP
GO:0072160		nephron tubule epithelial cell differentiation	11/7844	15/18493	0.015468	0.0789923	0.0588509	BP
GO:1904950		negative regulation of establishment of protein localization	93/7844	184/18493	0.0155054	0.07912	0.0589461	BP
GO:0034364		high-density lipoprotein particle	17/8443	26/19659	0.0176132	0.0786452	0.0598247	CC
GO:0048002		antigen processing and presentation of peptide antigen	72/7844	139/18493	0.0157891	0.0805029	0.0599763	BP
GO:0030098		lymphocyte differentiation	166/7844	344/18493	0.0158035	0.0805118	0.059983	BP
GO:1903038		negative regulation of leukocyte cell-cell adhesion	64/7844	122/18493	0.0158254	0.0805585	0.0600178	BP
GO:0045927		positive regulation of growth	131/7844	267/18493	0.016059	0.0815224	0.0607359	BP
GO:0006970		response to osmotic stress	42/7844	76/18493	0.0160935	0.0815224	0.0607359	BP
GO:0034766		negative regulation of ion transmembrane transport	54/7844	101/18493	0.0161635	0.0815224	0.0607359	BP
GO:0098869		cellular oxidant detoxification	54/7844	101/18493	0.0161635	0.0815224	0.0607359	BP
GO:0006884		cell volume homeostasis	18/7844	28/18493	0.0161686	0.0815224	0.0607359	BP
GO:0008209		androgen metabolic process	18/7844	28/18493	0.0161686	0.0815224	0.0607359	BP
GO:0009065		glutamine family amino acid catabolic process	18/7844	28/18493	0.0161686	0.0815224	0.0607359	BP
GO:0009074		aromatic amino acid family catabolic process	18/7844	28/18493	0.0161686	0.0815224	0.0607359	BP
GO:0034368		protein-lipid complex remodeling	18/7844	28/18493	0.0161686	0.0815224	0.0607359	BP
GO:0034369		plasma lipoprotein particle remodeling	18/7844	28/18493	0.0161686	0.0815224	0.0607359	BP
GO:0035116		embryonic hindlimb morphogenesis	18/7844	28/18493	0.0161686	0.0815224	0.0607359	BP
GO:0055075		potassium ion homeostasis	18/7844	28/18493	0.0161686	0.0815224	0.0607359	BP
GO:0004674		protein serine/threonine kinase activity	231/7872	455/17632	0.00456179	0.0691775	0.0607833	MF
GO:0051303		establishment of chromosome localization	41/7844	74/18493	0.0163742	0.0824936	0.0614594	BP
GO:0061045		negative regulation of wound healing	40/7844	72/18493	0.0166504	0.0838186	0.0624466	BP
GO:0006006		glucose metabolic process	102/7844	204/18493	0.0168602	0.0845188	0.0629683	BP
GO:0090257		regulation of muscle system process	124/7844	252/18493	0.0168644	0.0845188	0.0629683	BP
GO:0042572		retinol metabolic process	19/7844	30/18493	0.0168692	0.0845188	0.0629683	BP
GO:0042590		antigen processing and presentation of exogenous peptide antigen via MHC class I	19/7844	30/18493	0.0168692	0.0845188	0.0629683	BP
GO:0046596		regulation of viral entry into host cell	19/7844	30/18493	0.0168692	0.0845188	0.0629683	BP
GO:0090659		walking behavior	19/7844	30/18493	0.0168692	0.0845188	0.0629683	BP
GO:0032945		negative regulation of mononuclear cell proliferation	39/7844	70/18493	0.0169208	0.0845775	0.063012	BP
GO:0048678		response to axon injury	39/7844	70/18493	0.0169208	0.0845775	0.063012	BP
GO:0050672		negative regulation of lymphocyte proliferation	39/7844	70/18493	0.0169208	0.0845775	0.063012	BP
GO:0022600		digestive system process	52/7844	97/18493	0.0169341	0.0845775	0.063012	BP
GO:0009582		detection of abiotic stimulus	69/7844	133/18493	0.0171034	0.0852888	0.0635419	BP
GO:0090090		negative regulation of canonical Wnt signaling pathway	69/7844	133/18493	0.0171034	0.0852888	0.0635419	BP
GO:0050805		negative regulation of synaptic transmission	38/7844	68/18493	0.0171841	0.0855574	0.063742	BP
GO:0060998		regulation of dendritic spine development	38/7844	68/18493	0.0171841	0.0855574	0.063742	BP
GO:0006261		DNA-dependent DNA replication	76/7844	148/18493	0.0172335	0.0856691	0.0638252	BP
GO:0010977		negative regulation of neuron projection development	76/7844	148/18493	0.0172335	0.0856691	0.0638252	BP
GO:0032649		regulation of interferon-gamma production	51/7844	95/18493	0.0173288	0.0858405	0.063953	BP
GO:0060191		regulation of lipase activity	51/7844	95/18493	0.0173288	0.0858405	0.063953	BP
GO:1990823		response to leukemia inhibitory factor	51/7844	95/18493	0.0173288	0.0858405	0.063953	BP
GO:1990830		cellular response to leukemia inhibitory factor	51/7844	95/18493	0.0173288	0.0858405	0.063953	BP
GO:0002064		epithelial cell development	101/7844	202/18493	0.0173355	0.0858405	0.063953	BP
GO:0031349		positive regulation of defense response	203/7844	427/18493	0.0173608	0.0858988	0.0639964	BP
GO:1901136		carbohydrate derivative catabolic process	95/7844	189/18493	0.0173838	0.0859459	0.0640315	BP
GO:0002709		regulation of T cell mediated immunity	37/7844	66/18493	0.0174388	0.0860475	0.0641071	BP
GO:0007616		long-term memory	20/7844	32/18493	0.017445	0.0860475	0.0641071	BP
GO:0086019		cell-cell signaling involved in cardiac conduction	20/7844	32/18493	0.017445	0.0860475	0.0641071	BP
GO:0072175		epithelial tube formation	68/7844	131/18493	0.0175651	0.0863845	0.0643582	BP
GO:0050710		negative regulation of cytokine secretion	36/7844	64/18493	0.017683	0.0863845	0.0643582	BP
GO:0051785		positive regulation of nuclear division	36/7844	64/18493	0.017683	0.0863845	0.0643582	BP
GO:0071384		cellular response to corticosteroid stimulus	36/7844	64/18493	0.017683	0.0863845	0.0643582	BP
GO:1903036		positive regulation of response to wounding	36/7844	64/18493	0.017683	0.0863845	0.0643582	BP
GO:0006942		regulation of striated muscle contraction	50/7844	93/18493	0.0177295	0.0863845	0.0643582	BP
GO:0015908		fatty acid transport	50/7844	93/18493	0.0177295	0.0863845	0.0643582	BP
GO:1902115		regulation of organelle assembly	94/7844	187/18493	0.0178746	0.0863845	0.0643582	BP
GO:0007603		phototransduction, visible light	21/7844	34/18493	0.0179096	0.0863845	0.0643582	BP
GO:0032148		activation of protein kinase B activity	21/7844	34/18493	0.0179096	0.0863845	0.0643582	BP
GO:0048536		spleen development	21/7844	34/18493	0.0179096	0.0863845	0.0643582	BP
GO:0090322		regulation of superoxide metabolic process	21/7844	34/18493	0.0179096	0.0863845	0.0643582	BP
GO:0032233		positive regulation of actin filament bundle assembly	35/7844	62/18493	0.0179147	0.0863845	0.0643582	BP
GO:1902305		regulation of sodium ion transmembrane transport	35/7844	62/18493	0.0179147	0.0863845	0.0643582	BP
GO:0001573		ganglioside metabolic process	12/7844	17/18493	0.0179283	0.0863845	0.0643582	BP
GO:0006271		DNA strand elongation involved in DNA replication	12/7844	17/18493	0.0179283	0.0863845	0.0643582	BP
GO:0009084		glutamine family amino acid biosynthetic process	12/7844	17/18493	0.0179283	0.0863845	0.0643582	BP
GO:0034501		protein localization to kinetochore	12/7844	17/18493	0.0179283	0.0863845	0.0643582	BP
GO:0048532		anatomical structure arrangement	12/7844	17/18493	0.0179283	0.0863845	0.0643582	BP
GO:0050884		neuromuscular process controlling posture	12/7844	17/18493	0.0179283	0.0863845	0.0643582	BP
GO:0060644		mammary gland epithelial cell differentiation	12/7844	17/18493	0.0179283	0.0863845	0.0643582	BP
GO:0061081		positive regulation of myeloid leukocyte cytokine production involved in immune response	12/7844	17/18493	0.0179283	0.0863845	0.0643582	BP
GO:0070166		enamel mineralization	12/7844	17/18493	0.0179283	0.0863845	0.0643582	BP
GO:0090330		regulation of platelet aggregation	12/7844	17/18493	0.0179283	0.0863845	0.0643582	BP
GO:0031667		response to nutrient levels	227/7844	481/18493	0.0180858	0.0863845	0.0643582	BP
GO:0002287		alpha-beta T cell activation involved in immune response	34/7844	60/18493	0.0181318	0.0863845	0.0643582	BP
GO:0002293		alpha-beta T cell differentiation involved in immune response	34/7844	60/18493	0.0181318	0.0863845	0.0643582	BP
GO:0032835		glomerulus development	34/7844	60/18493	0.0181318	0.0863845	0.0643582	BP
GO:0071385		cellular response to glucocorticoid stimulus	34/7844	60/18493	0.0181318	0.0863845	0.0643582	BP
GO:0030516		regulation of axon extension	49/7844	91/18493	0.018136	0.0863845	0.0643582	BP
GO:0006692		prostanoid metabolic process	22/7844	36/18493	0.0182757	0.0863845	0.0643582	BP
GO:0006693		prostaglandin metabolic process	22/7844	36/18493	0.0182757	0.0863845	0.0643582	BP
GO:0010742		macrophage derived foam cell differentiation	22/7844	36/18493	0.0182757	0.0863845	0.0643582	BP
GO:0060416		response to growth hormone	22/7844	36/18493	0.0182757	0.0863845	0.0643582	BP
GO:0090077		foam cell differentiation	22/7844	36/18493	0.0182757	0.0863845	0.0643582	BP
GO:0090279		regulation of calcium ion import	22/7844	36/18493	0.0182757	0.0863845	0.0643582	BP
GO:0050714		positive regulation of protein secretion	121/7844	246/18493	0.0183124	0.0863845	0.0643582	BP
GO:0070304		positive regulation of stress-activated protein kinase signaling cascade	87/7844	172/18493	0.0183128	0.0863845	0.0643582	BP
GO:0007405		neuroblast proliferation	33/7844	58/18493	0.0183318	0.0863845	0.0643582	BP
GO:0001820		serotonin secretion	8/7844	10/18493	0.0183557	0.0863845	0.0643582	BP
GO:0002645		positive regulation of tolerance induction	8/7844	10/18493	0.0183557	0.0863845	0.0643582	BP
GO:0002887		negative regulation of myeloid leukocyte mediated immunity	8/7844	10/18493	0.0183557	0.0863845	0.0643582	BP
GO:0003376		sphingosine-1-phosphate receptor signaling pathway	8/7844	10/18493	0.0183557	0.0863845	0.0643582	BP
GO:0007135		meiosis II	8/7844	10/18493	0.0183557	0.0863845	0.0643582	BP
GO:0014877		response to muscle inactivity involved in regulation of muscle adaptation	8/7844	10/18493	0.0183557	0.0863845	0.0643582	BP
GO:0014894		response to denervation involved in regulation of muscle adaptation	8/7844	10/18493	0.0183557	0.0863845	0.0643582	BP
GO:0015886		heme transport	8/7844	10/18493	0.0183557	0.0863845	0.0643582	BP
GO:0019062		virion attachment to host cell	8/7844	10/18493	0.0183557	0.0863845	0.0643582	BP
GO:0032836		glomerular basement membrane development	8/7844	10/18493	0.0183557	0.0863845	0.0643582	BP
GO:0042989		sequestering of actin monomers	8/7844	10/18493	0.0183557	0.0863845	0.0643582	BP
GO:0048703		embryonic viscerocranium morphogenesis	8/7844	10/18493	0.0183557	0.0863845	0.0643582	BP
GO:0051133		regulation of NK T cell activation	8/7844	10/18493	0.0183557	0.0863845	0.0643582	BP
GO:0051256		mitotic spindle midzone assembly	8/7844	10/18493	0.0183557	0.0863845	0.0643582	BP
GO:0051481		negative regulation of cytosolic calcium ion concentration	8/7844	10/18493	0.0183557	0.0863845	0.0643582	BP
GO:0060068		vagina development	8/7844	10/18493	0.0183557	0.0863845	0.0643582	BP
GO:0060856		establishment of blood-brain barrier	8/7844	10/18493	0.0183557	0.0863845	0.0643582	BP
GO:0061140		lung secretory cell differentiation	8/7844	10/18493	0.0183557	0.0863845	0.0643582	BP
GO:0061408		positive regulation of transcription from RNA polymerase II promoter in response to heat stress	8/7844	10/18493	0.0183557	0.0863845	0.0643582	BP
GO:0061983		meiosis II cell cycle process	8/7844	10/18493	0.0183557	0.0863845	0.0643582	BP
GO:0070278		extracellular matrix constituent secretion	8/7844	10/18493	0.0183557	0.0863845	0.0643582	BP
GO:0070970		interleukin-2 secretion	8/7844	10/18493	0.0183557	0.0863845	0.0643582	BP
GO:2001054		negative regulation of mesenchymal cell apoptotic process	8/7844	10/18493	0.0183557	0.0863845	0.0643582	BP
GO:0098889		intrinsic component of presynaptic membrane	46/8443	84/19659	0.0191519	0.0850211	0.0646748	CC
GO:0032890		regulation of organic acid transport	32/7844	56/18493	0.0185117	0.0870545	0.0648574	BP
GO:0003156		regulation of animal organ formation	23/7844	38/18493	0.0185545	0.0871267	0.0649112	BP
GO:0086091		regulation of heart rate by cardiac conduction	23/7844	38/18493	0.0185545	0.0871267	0.0649112	BP
GO:0006606		protein import into nucleus	80/7844	157/18493	0.0186077	0.087312	0.0650492	BP
GO:0034394		protein localization to cell surface	31/7844	54/18493	0.0186686	0.0874687	0.065166	BP
GO:0061005		cell differentiation involved in kidney development	31/7844	54/18493	0.0186686	0.0874687	0.065166	BP
GO:0001990		regulation of systemic arterial blood pressure by hormone	24/7844	40/18493	0.0187564	0.0876216	0.0652799	BP
GO:0010828		positive regulation of glucose transmembrane transport	24/7844	40/18493	0.0187564	0.0876216	0.0652799	BP
GO:0030890		positive regulation of B cell proliferation	24/7844	40/18493	0.0187564	0.0876216	0.0652799	BP
GO:1990573		potassium ion import across plasma membrane	24/7844	40/18493	0.0187564	0.0876216	0.0652799	BP
GO:0030199		collagen fibril organization	30/7844	52/18493	0.0187988	0.0876669	0.0653137	BP
GO:0030072		peptide hormone secretion	120/7844	244/18493	0.0188229	0.0876669	0.0653137	BP
GO:0042551		neuron maturation	25/7844	42/18493	0.0188904	0.0876669	0.0653137	BP
GO:0001706		endoderm formation	29/7844	50/18493	0.0188983	0.0876669	0.0653137	BP
GO:0009311		oligosaccharide metabolic process	29/7844	50/18493	0.0188983	0.0876669	0.0653137	BP
GO:0007052		mitotic spindle organization	57/7844	108/18493	0.018912	0.0876669	0.0653137	BP
GO:0009409		response to cold	28/7844	48/18493	0.0189626	0.0876669	0.0653137	BP
GO:0051445		regulation of meiotic cell cycle	28/7844	48/18493	0.0189626	0.0876669	0.0653137	BP
GO:0007157		heterophilic cell-cell adhesion via plasma membrane cell adhesion molecules	26/7844	44/18493	0.0189648	0.0876669	0.0653137	BP
GO:0032309		icosanoid secretion	26/7844	44/18493	0.0189648	0.0876669	0.0653137	BP
GO:0051495		positive regulation of cytoskeleton organization	109/7844	220/18493	0.01898	0.0876669	0.0653137	BP
GO:0002711		positive regulation of T cell mediated immunity	27/7844	46/18493	0.0189867	0.0876669	0.0653137	BP
GO:0045214		sarcomere organization	27/7844	46/18493	0.0189867	0.0876669	0.0653137	BP
GO:0060443		mammary gland morphogenesis	27/7844	46/18493	0.0189867	0.0876669	0.0653137	BP
GO:0071715		icosanoid transport	27/7844	46/18493	0.0189867	0.0876669	0.0653137	BP
GO:1901571		fatty acid derivative transport	27/7844	46/18493	0.0189867	0.0876669	0.0653137	BP
GO:0002102		podosome	19/8443	30/19659	0.0195409	0.0862496	0.0656092	CC
GO:0001527		microfibril	8/8443	10/19659	0.0199773	0.0863711	0.0657017	CC
GO:0072687		meiotic spindle	8/8443	10/19659	0.0199773	0.0863711	0.0657017	CC
GO:0032426		stereocilium tip	12/8443	17/19659	0.0200183	0.0863711	0.0657017	CC
GO:0045120		pronucleus	12/8443	17/19659	0.0200183	0.0863711	0.0657017	CC
GO:0005272		sodium channel activity	27/7872	41/17632	0.00500471	0.0749455	0.0658514	MF
GO:0042737		drug catabolic process	72/7844	140/18493	0.0192212	0.0886855	0.0660726	BP
GO:0008519		ammonium transmembrane transporter activity	22/7872	32/17632	0.0050934	0.075332	0.0661911	MF
GO:0009416		response to light stimulus	149/7844	308/18493	0.0192801	0.0888926	0.0662268	BP
GO:0007599		hemostasis	163/7844	339/18493	0.0193192	0.0890085	0.0663132	BP
GO:0046427		positive regulation of JAK-STAT cascade	46/7844	85/18493	0.0193866	0.0892277	0.0664765	BP
GO:0045861		negative regulation of proteolysis	172/7844	359/18493	0.0193949	0.0892277	0.0664765	BP
GO:0051224		negative regulation of protein transport	91/7844	181/18493	0.0194352	0.0893484	0.0665664	BP
GO:0007043		cell-cell junction assembly	64/7844	123/18493	0.0195387	0.0896945	0.0668243	BP
GO:0050715		positive regulation of cytokine secretion	64/7844	123/18493	0.0195387	0.0896945	0.0668243	BP
GO:0005796		Golgi lumen	55/8443	103/19659	0.0207202	0.0889002	0.0676256	CC
GO:0005254		chloride channel activity	45/7872	75/17632	0.00528045	0.0771461	0.067785	MF
GO:0015293		symporter activity	79/7872	142/17632	0.00536322	0.0774113	0.068018	MF
GO:0045737		positive regulation of cyclin-dependent protein serine/threonine kinase activity	13/7844	19/18493	0.0200045	0.0913053	0.0680244	BP
GO:0048486		parasympathetic nervous system development	13/7844	19/18493	0.0200045	0.0913053	0.0680244	BP
GO:0060294		cilium movement involved in cell motility	13/7844	19/18493	0.0200045	0.0913053	0.0680244	BP
GO:0071800		podosome assembly	13/7844	19/18493	0.0200045	0.0913053	0.0680244	BP
GO:0072074		kidney mesenchyme development	13/7844	19/18493	0.0200045	0.0913053	0.0680244	BP
GO:0072079		nephron tubule formation	13/7844	19/18493	0.0200045	0.0913053	0.0680244	BP
GO:0097062		dendritic spine maintenance	13/7844	19/18493	0.0200045	0.0913053	0.0680244	BP
GO:2000831		regulation of steroid hormone secretion	13/7844	19/18493	0.0200045	0.0913053	0.0680244	BP
GO:0050772		positive regulation of axonogenesis	44/7844	81/18493	0.020242	0.0923234	0.0687829	BP
GO:0033559		unsaturated fatty acid metabolic process	54/7844	102/18493	0.0203932	0.092946	0.0692467	BP
GO:0044304		main axon	38/8443	68/19659	0.0213922	0.0912733	0.0694308	CC
GO:1905475		regulation of protein localization to membrane	89/7844	177/18493	0.0205538	0.093611	0.0697421	BP
GO:0030100		regulation of endocytosis	127/7844	260/18493	0.0205832	0.0936778	0.0697919	BP
GO:0010639		negative regulation of organelle organization	183/7844	384/18493	0.0206312	0.0938293	0.0699048	BP
GO:1905954		positive regulation of lipid localization	43/7844	79/18493	0.0206746	0.0939592	0.0700016	BP
GO:0005775		vacuolar lumen	87/8443	171/19659	0.0217709	0.0923758	0.0702694	CC
GO:0008191		metalloendopeptidase inhibitor activity	12/7872	15/17632	0.00583291	0.0803198	0.0705736	MF
GO:0015269		calcium-activated potassium channel activity	12/7872	15/17632	0.00583291	0.0803198	0.0705736	MF
GO:0031420		alkali metal ion binding	12/7872	15/17632	0.00583291	0.0803198	0.0705736	MF
GO:0050998		nitric-oxide synthase binding	12/7872	15/17632	0.00583291	0.0803198	0.0705736	MF
GO:0051222		positive regulation of protein transport	191/7844	402/18493	0.0210284	0.0954989	0.0711487	BP
GO:0008306		associative learning	42/7844	77/18493	0.0211093	0.0957298	0.0713207	BP
GO:0046209		nitric oxide metabolic process	42/7844	77/18493	0.0211093	0.0957298	0.0713207	BP
GO:0019882		antigen processing and presentation	88/7844	175/18493	0.021138	0.0957916	0.0713667	BP
GO:2001233		regulation of apoptotic signaling pathway	186/7844	391/18493	0.0213709	0.0967257	0.0720627	BP
GO:0010770		positive regulation of cell morphogenesis involved in differentiation	75/7844	147/18493	0.0213746	0.0967257	0.0720627	BP
GO:0006140		regulation of nucleotide metabolic process	52/7844	98/18493	0.0214354	0.0968291	0.0721397	BP
GO:2000379		positive regulation of reactive oxygen species metabolic process	52/7844	98/18493	0.0214354	0.0968291	0.0721397	BP
GO:0032635		interleukin-6 production	68/7844	132/18493	0.0214431	0.0968291	0.0721397	BP
GO:0097529		myeloid leukocyte migration	99/7844	199/18493	0.0214933	0.0969869	0.0722572	BP
GO:0070664		negative regulation of leukocyte proliferation	41/7844	75/18493	0.0215455	0.0971534	0.0723813	BP
GO:0019883		antigen processing and presentation of endogenous antigen	14/7844	21/18493	0.021732	0.0974417	0.0725961	BP
GO:0033622		integrin activation	14/7844	21/18493	0.021732	0.0974417	0.0725961	BP
GO:0035813		regulation of renal sodium excretion	14/7844	21/18493	0.021732	0.0974417	0.0725961	BP
GO:0042135		neurotransmitter catabolic process	14/7844	21/18493	0.021732	0.0974417	0.0725961	BP
GO:0042402		cellular biogenic amine catabolic process	14/7844	21/18493	0.021732	0.0974417	0.0725961	BP
GO:0045649		regulation of macrophage differentiation	14/7844	21/18493	0.021732	0.0974417	0.0725961	BP
GO:0051383		kinetochore organization	14/7844	21/18493	0.021732	0.0974417	0.0725961	BP
GO:0051900		regulation of mitochondrial depolarization	14/7844	21/18493	0.021732	0.0974417	0.0725961	BP
GO:0005253		anion channel activity	52/7872	89/17632	0.00608288	0.0828101	0.0727617	MF
GO:0034707		chloride channel complex	29/8443	50/19659	0.0227552	0.0960218	0.0730429	CC
GO:0120162		positive regulation of cold-induced thermogenesis	51/7844	96/18493	0.0219731	0.0982854	0.0732247	BP
GO:0009408		response to heat	74/7844	145/18493	0.0219773	0.0982854	0.0732247	BP
GO:0006809		nitric oxide biosynthetic process	40/7844	73/18493	0.0219821	0.0982854	0.0732247	BP
GO:1902117		positive regulation of organelle assembly	40/7844	73/18493	0.0219821	0.0982854	0.0732247	BP
GO:0008376		acetylgalactosaminyltransferase activity	30/7872	47/17632	0.00624506	0.0836061	0.0734611	MF
GO:0004713		protein tyrosine kinase activity	96/7872	177/17632	0.00628093	0.0836061	0.0734611	MF
GO:1903829		positive regulation of cellular protein localization	153/7844	318/18493	0.0222447	0.0993899	0.0740475	BP
GO:0048511		rhythmic process	134/7844	276/18493	0.0222639	0.0994057	0.0740593	BP
GO:0032874		positive regulation of stress-activated MAPK cascade	86/7844	171/18493	0.0223592	0.0997611	0.0743241	BP
GO:0061180		mammary gland epithelium development	39/7844	71/18493	0.0224179	0.0999528	0.0744669	BP
GO:1900542		regulation of purine nucleotide metabolic process	50/7844	94/18493	0.0225218	0.100346	0.0747597	BP
GO:0002065		columnar/cuboidal epithelial cell differentiation	58/7844	111/18493	0.0229129	0.100761	0.0750691	BP
GO:1903828		negative regulation of cellular protein localization	58/7844	111/18493	0.0229129	0.100761	0.0750691	BP
GO:0016101		diterpenoid metabolic process	49/7844	92/18493	0.0230815	0.100761	0.0750691	BP
GO:0009310		amine catabolic process	15/7844	23/18493	0.0231512	0.100761	0.0750691	BP
GO:0014829		vascular smooth muscle contraction	15/7844	23/18493	0.0231512	0.100761	0.0750691	BP
GO:0045686		negative regulation of glial cell differentiation	15/7844	23/18493	0.0231512	0.100761	0.0750691	BP
GO:0051446		positive regulation of meiotic cell cycle	15/7844	23/18493	0.0231512	0.100761	0.0750691	BP
GO:0051882		mitochondrial depolarization	15/7844	23/18493	0.0231512	0.100761	0.0750691	BP
GO:0060396		growth hormone receptor signaling pathway	15/7844	23/18493	0.0231512	0.100761	0.0750691	BP
GO:0071157		negative regulation of cell cycle arrest	15/7844	23/18493	0.0231512	0.100761	0.0750691	BP
GO:0072170		metanephric tubule development	15/7844	23/18493	0.0231512	0.100761	0.0750691	BP
GO:1903306		negative regulation of regulated secretory pathway	15/7844	23/18493	0.0231512	0.100761	0.0750691	BP
GO:0071236		cellular response to antibiotic	72/7844	141/18493	0.023236	0.100761	0.0750691	BP
GO:0030239		myofibril assembly	37/7844	67/18493	0.0232818	0.100761	0.0750691	BP
GO:0000022		mitotic spindle elongation	9/7844	12/18493	0.023344	0.100761	0.0750691	BP
GO:0002002		regulation of angiotensin levels in blood	9/7844	12/18493	0.023344	0.100761	0.0750691	BP
GO:0002716		negative regulation of natural killer cell mediated immunity	9/7844	12/18493	0.023344	0.100761	0.0750691	BP
GO:0006069		ethanol oxidation	9/7844	12/18493	0.023344	0.100761	0.0750691	BP
GO:0007288		sperm axoneme assembly	9/7844	12/18493	0.023344	0.100761	0.0750691	BP
GO:0008298		intracellular mRNA localization	9/7844	12/18493	0.023344	0.100761	0.0750691	BP
GO:0009886		post-embryonic animal morphogenesis	9/7844	12/18493	0.023344	0.100761	0.0750691	BP
GO:0010561		negative regulation of glycoprotein biosynthetic process	9/7844	12/18493	0.023344	0.100761	0.0750691	BP
GO:0010935		regulation of macrophage cytokine production	9/7844	12/18493	0.023344	0.100761	0.0750691	BP
GO:0033623		regulation of integrin activation	9/7844	12/18493	0.023344	0.100761	0.0750691	BP
GO:0035092		sperm chromatin condensation	9/7844	12/18493	0.023344	0.100761	0.0750691	BP
GO:0035641		locomotory exploration behavior	9/7844	12/18493	0.023344	0.100761	0.0750691	BP
GO:0042340		keratan sulfate catabolic process	9/7844	12/18493	0.023344	0.100761	0.0750691	BP
GO:0045091		regulation of single stranded viral RNA replication via double stranded DNA intermediate	9/7844	12/18493	0.023344	0.100761	0.0750691	BP
GO:0048934		peripheral nervous system neuron differentiation	9/7844	12/18493	0.023344	0.100761	0.0750691	BP
GO:0048935		peripheral nervous system neuron development	9/7844	12/18493	0.023344	0.100761	0.0750691	BP
GO:0051988		regulation of attachment of spindle microtubules to kinetochore	9/7844	12/18493	0.023344	0.100761	0.0750691	BP
GO:0055015		ventricular cardiac muscle cell development	9/7844	12/18493	0.023344	0.100761	0.0750691	BP
GO:0060391		positive regulation of SMAD protein signal transduction	9/7844	12/18493	0.023344	0.100761	0.0750691	BP
GO:0060453		regulation of gastric acid secretion	9/7844	12/18493	0.023344	0.100761	0.0750691	BP
GO:0061478		response to platelet aggregation inhibitor	9/7844	12/18493	0.023344	0.100761	0.0750691	BP
GO:0071415		cellular response to purine-containing compound	9/7844	12/18493	0.023344	0.100761	0.0750691	BP
GO:0086067		AV node cell to bundle of His cell communication	9/7844	12/18493	0.023344	0.100761	0.0750691	BP
GO:0097499		protein localization to non-motile cilium	9/7844	12/18493	0.023344	0.100761	0.0750691	BP
GO:0098962		regulation of postsynaptic neurotransmitter receptor activity	9/7844	12/18493	0.023344	0.100761	0.0750691	BP
GO:0099550		trans-synaptic signaling, modulating synaptic transmission	9/7844	12/18493	0.023344	0.100761	0.0750691	BP
GO:1901387		positive regulation of voltage-gated calcium channel activity	9/7844	12/18493	0.023344	0.100761	0.0750691	BP
GO:1902224		ketone body metabolic process	9/7844	12/18493	0.023344	0.100761	0.0750691	BP
GO:1902414		protein localization to cell junction	9/7844	12/18493	0.023344	0.100761	0.0750691	BP
GO:2000344		positive regulation of acrosome reaction	9/7844	12/18493	0.023344	0.100761	0.0750691	BP
GO:2001053		regulation of mesenchymal cell apoptotic process	9/7844	12/18493	0.023344	0.100761	0.0750691	BP
GO:2001204		regulation of osteoclast development	9/7844	12/18493	0.023344	0.100761	0.0750691	BP
GO:0006979		response to oxidative stress	208/7844	441/18493	0.0234045	0.100954	0.0752126	BP
GO:0002688		regulation of leukocyte chemotaxis	57/7844	109/18493	0.0235277	0.101416	0.0755572	BP
GO:0035418		protein localization to synapse	36/7844	65/18493	0.0237068	0.102119	0.0760809	BP
GO:0031571		mitotic G1 DNA damage checkpoint	35/7844	63/18493	0.0241246	0.10369	0.0772513	BP
GO:0044819		mitotic G1/S transition checkpoint	35/7844	63/18493	0.0241246	0.10369	0.0772513	BP
GO:0046686		response to cadmium ion	35/7844	63/18493	0.0241246	0.10369	0.0772513	BP
GO:0045862		positive regulation of proteolysis	168/7844	352/18493	0.0241367	0.10369	0.0772513	BP
GO:0048640		negative regulation of developmental growth	56/7844	107/18493	0.0241583	0.103713	0.077268	BP
GO:0045637		regulation of myeloid cell differentiation	121/7844	248/18493	0.0242522	0.103834	0.0773588	BP
GO:0006700		C21-steroid hormone biosynthetic process	16/7844	25/18493	0.024301	0.103834	0.0773588	BP
GO:0030194		positive regulation of blood coagulation	16/7844	25/18493	0.024301	0.103834	0.0773588	BP
GO:0035235		ionotropic glutamate receptor signaling pathway	16/7844	25/18493	0.024301	0.103834	0.0773588	BP
GO:0050858		negative regulation of antigen receptor-mediated signaling pathway	16/7844	25/18493	0.024301	0.103834	0.0773588	BP
GO:0097186		amelogenesis	16/7844	25/18493	0.024301	0.103834	0.0773588	BP
GO:1900048		positive regulation of hemostasis	16/7844	25/18493	0.024301	0.103834	0.0773588	BP
GO:0009584		detection of visible light	34/7844	61/18493	0.0245331	0.104685	0.0779928	BP
GO:0045669		positive regulation of osteoblast differentiation	34/7844	61/18493	0.0245331	0.104685	0.0779928	BP
GO:0046683		response to organophosphorus	70/7844	137/18493	0.0245698	0.104772	0.0780571	BP
GO:0000242		pericentriolar material	14/8443	21/19659	0.0244742	0.102711	0.0781316	CC
GO:0001909		leukocyte mediated cytotoxicity	55/7844	105/18493	0.024805	0.105595	0.0786705	BP
GO:0022037		metencephalon development	55/7844	105/18493	0.024805	0.105595	0.0786705	BP
GO:0000302		response to reactive oxygen species	110/7844	224/18493	0.0248127	0.105595	0.0786705	BP
GO:0034113		heterotypic cell-cell adhesion	33/7844	59/18493	0.0249296	0.106022	0.0789883	BP
GO:0032660		regulation of interleukin-17 production	17/7844	27/18493	0.0252172	0.107102	0.0797929	BP
GO:0060384		innervation	17/7844	27/18493	0.0252172	0.107102	0.0797929	BP
GO:0000940		condensed chromosome outer kinetochore	9/8443	12/19659	0.025526	0.105397	0.0801749	CC
GO:0005890		sodium:potassium-exchanging ATPase complex	9/8443	12/19659	0.025526	0.105397	0.0801749	CC
GO:1990454		L-type voltage-gated calcium channel complex	9/8443	12/19659	0.025526	0.105397	0.0801749	CC
GO:0070542		response to fatty acid	45/7844	84/18493	0.0254275	0.107923	0.0804047	BP
GO:0090100		positive regulation of transmembrane receptor protein serine/threonine kinase signaling pathway	54/7844	103/18493	0.0254683	0.108024	0.0804798	BP
GO:0098562		cytoplasmic side of membrane	87/8443	172/19659	0.0257769	0.105864	0.08053	CC
GO:0001205		distal enhancer DNA-binding transcription activator activity, RNA polymerase II-specific	25/7872	38/17632	0.00696291	0.0916655	0.0805426	MF
GO:2001234		negative regulation of apoptotic signaling pathway	109/7844	222/18493	0.0255113	0.108134	0.0805619	BP
GO:0042119		neutrophil activation	233/7844	498/18493	0.02561	0.108408	0.0807659	BP
GO:0060627		regulation of vesicle-mediated transport	233/7844	498/18493	0.02561	0.108408	0.0807659	BP
GO:0031294		lymphocyte costimulation	31/7844	55/18493	0.0256749	0.108466	0.0808093	BP
GO:0090303		positive regulation of wound healing	31/7844	55/18493	0.0256749	0.108466	0.0808093	BP
GO:2000242		negative regulation of reproductive process	31/7844	55/18493	0.0256749	0.108466	0.0808093	BP
GO:0000083		regulation of transcription involved in G1/S transition of mitotic cell cycle	18/7844	29/18493	0.0259318	0.109112	0.0812907	BP
GO:0007628		adult walking behavior	18/7844	29/18493	0.0259318	0.109112	0.0812907	BP
GO:0034698		response to gonadotropin	18/7844	29/18493	0.0259318	0.109112	0.0812907	BP
GO:0050718		positive regulation of interleukin-1 beta secretion	18/7844	29/18493	0.0259318	0.109112	0.0812907	BP
GO:0070306		lens fiber cell differentiation	18/7844	29/18493	0.0259318	0.109112	0.0812907	BP
GO:0090200		positive regulation of release of cytochrome c from mitochondria	18/7844	29/18493	0.0259318	0.109112	0.0812907	BP
GO:0001704		formation of primary germ layer	61/7844	118/18493	0.0259805	0.109112	0.0812907	BP
GO:0032663		regulation of interleukin-2 production	30/7844	53/18493	0.0260166	0.109112	0.0812907	BP
GO:0043392		negative regulation of DNA binding	30/7844	53/18493	0.0260166	0.109112	0.0812907	BP
GO:0050879		multicellular organismal movement	30/7844	53/18493	0.0260166	0.109112	0.0812907	BP
GO:0050881		musculoskeletal movement	30/7844	53/18493	0.0260166	0.109112	0.0812907	BP
GO:0014031		mesenchymal cell development	44/7844	82/18493	0.0260398	0.109137	0.0813094	BP
GO:0045505		dynein intermediate chain binding	20/7872	29/17632	0.00710989	0.0925831	0.0813488	MF
GO:0016460		myosin II complex	15/8443	23/19659	0.0261819	0.106956	0.0813604	CC
GO:0015837		amine transport	53/7844	101/18493	0.0261483	0.109448	0.0815407	BP
GO:1904659		glucose transmembrane transport	53/7844	101/18493	0.0261483	0.109448	0.0815407	BP
GO:0019722		calcium-mediated signaling	108/7844	220/18493	0.0262303	0.109718	0.0817425	BP
GO:0032386		regulation of intracellular transport	199/7844	422/18493	0.0263211	0.109852	0.0818423	BP
GO:0045840		positive regulation of mitotic nuclear division	29/7844	51/18493	0.0263321	0.109852	0.0818423	BP
GO:0051092		positive regulation of NF-kappaB transcription factor activity	74/7844	146/18493	0.0263631	0.109852	0.0818423	BP
GO:0006691		leukotriene metabolic process	19/7844	31/18493	0.0264728	0.109852	0.0818423	BP
GO:0009154		purine ribonucleotide catabolic process	19/7844	31/18493	0.0264728	0.109852	0.0818423	BP
GO:0032620		interleukin-17 production	19/7844	31/18493	0.0264728	0.109852	0.0818423	BP
GO:0042554		superoxide anion generation	19/7844	31/18493	0.0264728	0.109852	0.0818423	BP
GO:0045742		positive regulation of epidermal growth factor receptor signaling pathway	19/7844	31/18493	0.0264728	0.109852	0.0818423	BP
GO:0045761		regulation of adenylate cyclase activity	19/7844	31/18493	0.0264728	0.109852	0.0818423	BP
GO:0055094		response to lipoprotein particle	19/7844	31/18493	0.0264728	0.109852	0.0818423	BP
GO:0002703		regulation of leukocyte mediated immunity	97/7844	196/18493	0.0265393	0.109852	0.0818423	BP
GO:2001057		reactive nitrogen species metabolic process	43/7844	80/18493	0.0266616	0.109852	0.0818423	BP
GO:0048675		axon extension	60/7844	116/18493	0.026704	0.109852	0.0818423	BP
GO:0002027		regulation of heart rate	52/7844	99/18493	0.0268453	0.109852	0.0818423	BP
GO:0060042		retina morphogenesis in camera-type eye	27/7844	47/18493	0.0268638	0.109852	0.0818423	BP
GO:0003338		metanephros morphogenesis	20/7844	33/18493	0.0268642	0.109852	0.0818423	BP
GO:0032633		interleukin-4 production	20/7844	33/18493	0.0268642	0.109852	0.0818423	BP
GO:0046326		positive regulation of glucose import	20/7844	33/18493	0.0268642	0.109852	0.0818423	BP
GO:0098801		regulation of renal system process	20/7844	33/18493	0.0268642	0.109852	0.0818423	BP
GO:1901976		regulation of cell cycle checkpoint	20/7844	33/18493	0.0268642	0.109852	0.0818423	BP
GO:1905332		positive regulation of morphogenesis of an epithelium	20/7844	33/18493	0.0268642	0.109852	0.0818423	BP
GO:0032732		positive regulation of interleukin-1 production	26/7844	45/18493	0.0270678	0.109852	0.0818423	BP
GO:0035987		endodermal cell differentiation	26/7844	45/18493	0.0270678	0.109852	0.0818423	BP
GO:0035909		aorta morphogenesis	21/7844	35/18493	0.0271272	0.109852	0.0818423	BP
GO:0051954		positive regulation of amine transport	21/7844	35/18493	0.0271272	0.109852	0.0818423	BP
GO:0060428		lung epithelium development	21/7844	35/18493	0.0271272	0.109852	0.0818423	BP
GO:0015701		bicarbonate transport	25/7844	43/18493	0.0272208	0.109852	0.0818423	BP
GO:0032924		activin receptor signaling pathway	25/7844	43/18493	0.0272208	0.109852	0.0818423	BP
GO:0090317		negative regulation of intracellular protein transport	25/7844	43/18493	0.0272208	0.109852	0.0818423	BP
GO:0009410		response to xenobiotic stimulus	136/7844	282/18493	0.027272	0.109852	0.0818423	BP
GO:0015695		organic cation transport	22/7844	37/18493	0.0272798	0.109852	0.0818423	BP
GO:0015804		neutral amino acid transport	22/7844	37/18493	0.0272798	0.109852	0.0818423	BP
GO:0046636		negative regulation of alpha-beta T cell activation	22/7844	37/18493	0.0272798	0.109852	0.0818423	BP
GO:1902042		negative regulation of extrinsic apoptotic signaling pathway via death domain receptors	22/7844	37/18493	0.0272798	0.109852	0.0818423	BP
GO:0014032		neural crest cell development	42/7844	78/18493	0.0272926	0.109852	0.0818423	BP
GO:0098659		inorganic cation import across plasma membrane	42/7844	78/18493	0.0272926	0.109852	0.0818423	BP
GO:0099587		inorganic ion import across plasma membrane	42/7844	78/18493	0.0272926	0.109852	0.0818423	BP
GO:1900182		positive regulation of protein localization to nucleus	42/7844	78/18493	0.0272926	0.109852	0.0818423	BP
GO:0019835		cytolysis	23/7844	39/18493	0.0273376	0.109852	0.0818423	BP
GO:0030049		muscle filament sliding	23/7844	39/18493	0.0273376	0.109852	0.0818423	BP
GO:0033275		actin-myosin filament sliding	23/7844	39/18493	0.0273376	0.109852	0.0818423	BP
GO:0042417		dopamine metabolic process	23/7844	39/18493	0.0273376	0.109852	0.0818423	BP
GO:0060119		inner ear receptor cell development	23/7844	39/18493	0.0273376	0.109852	0.0818423	BP
GO:0003214		cardiac left ventricle morphogenesis	10/7844	14/18493	0.0274026	0.109852	0.0818423	BP
GO:0009214		cyclic nucleotide catabolic process	10/7844	14/18493	0.0274026	0.109852	0.0818423	BP
GO:0010248		establishment or maintenance of transmembrane electrochemical gradient	10/7844	14/18493	0.0274026	0.109852	0.0818423	BP
GO:0010755		regulation of plasminogen activation	10/7844	14/18493	0.0274026	0.109852	0.0818423	BP
GO:0010934		macrophage cytokine production	10/7844	14/18493	0.0274026	0.109852	0.0818423	BP
GO:0014854		response to inactivity	10/7844	14/18493	0.0274026	0.109852	0.0818423	BP
GO:0019372		lipoxygenase pathway	10/7844	14/18493	0.0274026	0.109852	0.0818423	BP
GO:0032700		negative regulation of interleukin-17 production	10/7844	14/18493	0.0274026	0.109852	0.0818423	BP
GO:0034331		cell junction maintenance	10/7844	14/18493	0.0274026	0.109852	0.0818423	BP
GO:0034374		low-density lipoprotein particle remodeling	10/7844	14/18493	0.0274026	0.109852	0.0818423	BP
GO:0036376		sodium ion export across plasma membrane	10/7844	14/18493	0.0274026	0.109852	0.0818423	BP
GO:0042308		negative regulation of protein import into nucleus	10/7844	14/18493	0.0274026	0.109852	0.0818423	BP
GO:0044146		negative regulation of growth of symbiont involved in interaction with host	10/7844	14/18493	0.0274026	0.109852	0.0818423	BP
GO:0045198		establishment of epithelial cell apical/basal polarity	10/7844	14/18493	0.0274026	0.109852	0.0818423	BP
GO:0048143		astrocyte activation	10/7844	14/18493	0.0274026	0.109852	0.0818423	BP
GO:0051299		centrosome separation	10/7844	14/18493	0.0274026	0.109852	0.0818423	BP
GO:0071941		nitrogen cycle metabolic process	10/7844	14/18493	0.0274026	0.109852	0.0818423	BP
GO:0072498		embryonic skeletal joint development	10/7844	14/18493	0.0274026	0.109852	0.0818423	BP
GO:0090399		replicative senescence	10/7844	14/18493	0.0274026	0.109852	0.0818423	BP
GO:0097286		iron ion import	10/7844	14/18493	0.0274026	0.109852	0.0818423	BP
GO:1900121		negative regulation of receptor binding	10/7844	14/18493	0.0274026	0.109852	0.0818423	BP
GO:1904590		negative regulation of protein import	10/7844	14/18493	0.0274026	0.109852	0.0818423	BP
GO:1905153		regulation of membrane invagination	10/7844	14/18493	0.0274026	0.109852	0.0818423	BP
GO:0007200		phospholipase C-activating G protein-coupled receptor signaling pathway	51/7844	97/18493	0.0275597	0.110413	0.0822597	BP
GO:0007584		response to nutrient	106/7844	216/18493	0.0277319	0.111032	0.0827215	BP
GO:0032956		regulation of actin cytoskeleton organization	158/7844	331/18493	0.0278505	0.111437	0.083023	BP
GO:0051897		positive regulation of protein kinase B signaling	84/7844	168/18493	0.0279467	0.111752	0.0832572	BP
GO:0051249		regulation of lymphocyte activation	221/7844	472/18493	0.0280817	0.112221	0.083607	BP
GO:1990266		neutrophil migration	58/7844	112/18493	0.0282129	0.112674	0.0839448	BP
GO:0043367		CD4-positive, alpha-beta T cell differentiation	40/7844	74/18493	0.0285796	0.11399	0.0849248	BP
GO:0072395		signal transduction involved in cell cycle checkpoint	40/7844	74/18493	0.0285796	0.11399	0.0849248	BP
GO:0060828		regulation of canonical Wnt signaling pathway	115/7844	236/18493	0.0285961	0.11399	0.0849248	BP
GO:0048018		receptor ligand activity	240/7872	478/17632	0.00758918	0.0969493	0.0851852	MF
GO:0061135		endopeptidase regulator activity	98/7872	182/17632	0.00760704	0.0969493	0.0851852	MF
GO:0071482		cellular response to light stimulus	64/7844	125/18493	0.0290694	0.115804	0.0862765	BP
GO:0005938		cell cortex	142/8443	292/19659	0.0279894	0.113735	0.086517	CC
GO:0050792		regulation of viral process	88/7844	177/18493	0.0293035	0.116663	0.0869167	BP
GO:0038024		cargo receptor activity	49/7872	84/17632	0.0079292	0.0989695	0.0869603	MF
GO:0004675		transmembrane receptor protein serine/threonine kinase activity	13/7872	17/17632	0.00793078	0.0989695	0.0869603	MF
GO:0009898		cytoplasmic side of plasma membrane	76/8443	149/19659	0.0284138	0.114851	0.0873665	CC
GO:0022804		active transmembrane transporter activity	178/7872	348/17632	0.00810579	0.0994528	0.0873849	MF
GO:0005249		voltage-gated potassium channel activity	51/7872	88/17632	0.00813553	0.0994528	0.0873849	MF
GO:0032432		actin filament bundle	37/8443	67/19659	0.0286497	0.115016	0.0874919	CC
GO:0032281		AMPA glutamate receptor complex	17/8443	27/19659	0.0287541	0.115016	0.0874919	CC
GO:0004896		cytokine receptor activity	53/7872	92/17632	0.00830888	0.100546	0.0883453	MF
GO:0071556		integral component of lumenal side of endoplasmic reticulum membrane	18/8443	29/19659	0.0296889	0.117531	0.089405	CC
GO:0098553		lumenal side of endoplasmic reticulum membrane	18/8443	29/19659	0.0296889	0.117531	0.089405	CC
GO:0010369		chromocenter	10/8443	14/19659	0.0301013	0.117852	0.0896488	CC
GO:0001725		stress fiber	33/8443	59/19659	0.0302302	0.117852	0.0896488	CC
GO:0097517		contractile actin filament bundle	33/8443	59/19659	0.0302302	0.117852	0.0896488	CC
GO:0001540		amyloid-beta binding	37/7872	61/17632	0.00855428	0.102083	0.0896962	MF
GO:0042562		hormone binding	59/7872	104/17632	0.00865588	0.102083	0.0896962	MF
GO:0099094		ligand-gated cation channel activity	60/7872	106/17632	0.00869156	0.102083	0.0896962	MF
GO:0007596		blood coagulation	159/7844	334/18493	0.0304121	0.121001	0.0901486	BP
GO:0000076		DNA replication checkpoint	11/7844	16/18493	0.0306475	0.121331	0.0903939	BP
GO:0001780		neutrophil homeostasis	11/7844	16/18493	0.0306475	0.121331	0.0903939	BP
GO:0003198		epithelial to mesenchymal transition involved in endocardial cushion formation	11/7844	16/18493	0.0306475	0.121331	0.0903939	BP
GO:0030214		hyaluronan catabolic process	11/7844	16/18493	0.0306475	0.121331	0.0903939	BP
GO:0060413		atrial septum morphogenesis	11/7844	16/18493	0.0306475	0.121331	0.0903939	BP
GO:0060572		morphogenesis of an epithelial bud	11/7844	16/18493	0.0306475	0.121331	0.0903939	BP
GO:0090083		regulation of inclusion body assembly	11/7844	16/18493	0.0306475	0.121331	0.0903939	BP
GO:2000846		regulation of corticosteroid hormone secretion	11/7844	16/18493	0.0306475	0.121331	0.0903939	BP
GO:0045667		regulation of osteoblast differentiation	62/7844	121/18493	0.0307535	0.121674	0.0906498	BP
GO:0016229		steroid dehydrogenase activity	22/7872	33/17632	0.00888087	0.103294	0.0907601	MF
GO:0008237		metallopeptidase activity	101/7872	189/17632	0.00903534	0.10408	0.0914508	MF
GO:0080008		Cul4-RING E3 ubiquitin ligase complex	20/8443	33/19659	0.031003	0.120254	0.0914763	CC
GO:0002292		T cell differentiation involved in immune response	36/7844	66/18493	0.0312284	0.1234	0.0919355	BP
GO:0030858		positive regulation of epithelial cell differentiation	36/7844	66/18493	0.0312284	0.1234	0.0919355	BP
GO:0043433		negative regulation of DNA-binding transcription factor activity	80/7844	160/18493	0.03132	0.123685	0.0921478	BP
GO:0030330		DNA damage response, signal transduction by p53 class mediator	54/7844	104/18493	0.0314944	0.124296	0.0926034	BP
GO:1905477		positive regulation of protein localization to membrane	61/7844	119/18493	0.0316333	0.124767	0.0929541	BP
GO:0044783		G1 DNA damage checkpoint	35/7844	64/18493	0.031899	0.125737	0.0936768	BP
GO:0043393		regulation of protein binding	106/7844	217/18493	0.0319539	0.125875	0.0937797	BP
GO:0061134		peptidase regulator activity	116/7872	220/17632	0.00935467	0.106732	0.0937811	MF
GO:0002456		T cell mediated immunity	53/7844	102/18493	0.0323732	0.127448	0.0949516	BP
GO:0019079		viral genome replication	60/7844	117/18493	0.0325395	0.127826	0.0952328	BP
GO:0051188		cofactor biosynthetic process	134/7844	279/18493	0.032555	0.127826	0.0952328	BP
GO:0006940		regulation of smooth muscle contraction	34/7844	62/18493	0.0325696	0.127826	0.0952328	BP
GO:0032623		interleukin-2 production	34/7844	62/18493	0.0325696	0.127826	0.0952328	BP
GO:0051148		negative regulation of muscle cell differentiation	34/7844	62/18493	0.0325696	0.127826	0.0952328	BP
GO:0043122		regulation of I-kappaB kinase/NF-kappaB signaling	110/7844	226/18493	0.032825	0.128749	0.0959204	BP
GO:0045582		positive regulation of T cell differentiation	44/7844	83/18493	0.0330654	0.129532	0.0965038	BP
GO:0046849		bone remodeling	44/7844	83/18493	0.0330654	0.129532	0.0965038	BP
GO:0001710		mesodermal cell fate commitment	12/7844	18/18493	0.0332067	0.129686	0.0966186	BP
GO:0006704		glucocorticoid biosynthetic process	12/7844	18/18493	0.0332067	0.129686	0.0966186	BP
GO:0007250		activation of NF-kappaB-inducing kinase activity	12/7844	18/18493	0.0332067	0.129686	0.0966186	BP
GO:0007252		I-kappaB phosphorylation	12/7844	18/18493	0.0332067	0.129686	0.0966186	BP
GO:0045063		T-helper 1 cell differentiation	12/7844	18/18493	0.0332067	0.129686	0.0966186	BP
GO:0035019		somatic stem cell population maintenance	33/7844	60/18493	0.033238	0.129728	0.0966501	BP
GO:2001056		positive regulation of cysteine-type endopeptidase activity	72/7844	143/18493	0.0332735	0.129787	0.0966941	BP
GO:0045453		bone resorption	32/7844	58/18493	0.0339015	0.132156	0.0984587	BP
GO:0044106		cellular amine metabolic process	43/7844	81/18493	0.0339259	0.13217	0.0984692	BP
GO:0001673		male germ cell nucleus	11/8443	16/19659	0.0338166	0.129856	0.09878	CC
GO:0042613		MHC class II protein complex	11/8443	16/19659	0.0338166	0.129856	0.09878	CC
GO:0030177		positive regulation of Wnt signaling pathway	65/7844	128/18493	0.0340552	0.132592	0.0987839	BP
GO:0043015		gamma-tubulin binding	18/7872	26/17632	0.0099559	0.11252	0.0988669	MF
GO:0044773		mitotic DNA damage checkpoint	51/7844	98/18493	0.0342053	0.133095	0.0991586	BP
GO:0046467		membrane lipid biosynthetic process	71/7844	141/18493	0.0342434	0.133162	0.0992082	BP
GO:0006090		pyruvate metabolic process	58/7844	113/18493	0.034434	0.133821	0.0996996	BP
GO:0010952		positive regulation of peptidase activity	93/7844	189/18493	0.0345289	0.133891	0.0997515	BP
GO:0002446		neutrophil mediated immunity	232/7844	499/18493	0.0345442	0.133891	0.0997515	BP
GO:0006977		DNA damage response, signal transduction by p53 class mediator resulting in cell cycle arrest	31/7844	56/18493	0.0345573	0.133891	0.0997515	BP
GO:0042130		negative regulation of T cell proliferation	31/7844	56/18493	0.0345573	0.133891	0.0997515	BP
GO:0046605		regulation of centrosome cycle	31/7844	56/18493	0.0345573	0.133891	0.0997515	BP
GO:0030512		negative regulation of transforming growth factor beta receptor signaling pathway	42/7844	79/18493	0.034805	0.134769	0.100406	BP
GO:0021549		cerebellum development	50/7844	96/18493	0.0351599	0.134905	0.100507	BP
GO:0002089		lens morphogenesis in camera-type eye	13/7844	20/18493	0.0351965	0.134905	0.100507	BP
GO:0003215		cardiac right ventricle morphogenesis	13/7844	20/18493	0.0351965	0.134905	0.100507	BP
GO:0003283		atrial septum development	13/7844	20/18493	0.0351965	0.134905	0.100507	BP
GO:0032462		regulation of protein homooligomerization	13/7844	20/18493	0.0351965	0.134905	0.100507	BP
GO:0032656		regulation of interleukin-13 production	13/7844	20/18493	0.0351965	0.134905	0.100507	BP
GO:0033630		positive regulation of cell adhesion mediated by integrin	13/7844	20/18493	0.0351965	0.134905	0.100507	BP
GO:0042533		tumor necrosis factor biosynthetic process	13/7844	20/18493	0.0351965	0.134905	0.100507	BP
GO:0042534		regulation of tumor necrosis factor biosynthetic process	13/7844	20/18493	0.0351965	0.134905	0.100507	BP
GO:0097205		renal filtration	13/7844	20/18493	0.0351965	0.134905	0.100507	BP
GO:0097242		amyloid-beta clearance	13/7844	20/18493	0.0351965	0.134905	0.100507	BP
GO:1902473		regulation of protein localization to synapse	13/7844	20/18493	0.0351965	0.134905	0.100507	BP
GO:1903055		positive regulation of extracellular matrix organization	13/7844	20/18493	0.0351965	0.134905	0.100507	BP
GO:0006584		catecholamine metabolic process	30/7844	54/18493	0.0352017	0.134905	0.100507	BP
GO:0009712		catechol-containing compound metabolic process	30/7844	54/18493	0.0352017	0.134905	0.100507	BP
GO:0031295		T cell costimulation	30/7844	54/18493	0.0352017	0.134905	0.100507	BP
GO:0045123		cellular extravasation	30/7844	54/18493	0.0352017	0.134905	0.100507	BP
GO:0010821		regulation of mitochondrion organization	87/7844	176/18493	0.0352256	0.134905	0.100507	BP
GO:0050773		regulation of dendrite development	70/7844	139/18493	0.0352433	0.134905	0.100507	BP
GO:0002283		neutrophil activation involved in immune response	227/7844	488/18493	0.0354043	0.135434	0.100901	BP
GO:0030218		erythrocyte differentiation	57/7844	111/18493	0.0354242	0.135434	0.100901	BP
GO:0043030		regulation of macrophage activation	29/7844	52/18493	0.0358307	0.136906	0.101998	BP
GO:0001838		embryonic epithelial tube formation	63/7844	124/18493	0.0360669	0.137726	0.102609	BP
GO:0051952		regulation of amine transport	49/7844	94/18493	0.036141	0.137888	0.102729	BP
GO:1990845		adaptive thermogenesis	75/7844	150/18493	0.0361528	0.137888	0.102729	BP
GO:2001238		positive regulation of extrinsic apoptotic signaling pathway	28/7844	50/18493	0.0364395	0.138898	0.103482	BP
GO:0032616		interleukin-13 production	14/7844	22/18493	0.0367158	0.139617	0.104017	BP
GO:0032703		negative regulation of interleukin-2 production	14/7844	22/18493	0.0367158	0.139617	0.104017	BP
GO:0034123		positive regulation of toll-like receptor signaling pathway	14/7844	22/18493	0.0367158	0.139617	0.104017	BP
GO:0071459		protein localization to chromosome, centromeric region	14/7844	22/18493	0.0367158	0.139617	0.104017	BP
GO:0045125		bioactive lipid receptor activity	11/7872	14/17632	0.0106258	0.118969	0.104533	MF
GO:0003254		regulation of membrane depolarization	27/7844	48/18493	0.0370226	0.140699	0.104824	BP
GO:0032368		regulation of lipid transport	62/7844	122/18493	0.0371197	0.140984	0.105036	BP
GO:0006165		nucleoside diphosphate phosphorylation	48/7844	92/18493	0.0371493	0.141012	0.105057	BP
GO:0071774		response to fibroblast growth factor	74/7844	148/18493	0.037211	0.141162	0.105169	BP
GO:0002792		negative regulation of peptide secretion	68/7844	135/18493	0.0373376	0.141413	0.105356	BP
GO:0007586		digestion	68/7844	135/18493	0.0373376	0.141413	0.105356	BP
GO:0006470		protein dephosphorylation	151/7844	318/18493	0.037344	0.141413	0.105356	BP
GO:0072401		signal transduction involved in DNA integrity checkpoint	39/7844	73/18493	0.0375524	0.142028	0.105814	BP
GO:0072422		signal transduction involved in DNA damage checkpoint	39/7844	73/18493	0.0375524	0.142028	0.105814	BP
GO:0031279		regulation of cyclase activity	26/7844	46/18493	0.0375733	0.142028	0.105814	BP
GO:0001516		prostaglandin biosynthetic process	15/7844	24/18493	0.0378468	0.142048	0.105829	BP
GO:0002092		positive regulation of receptor internalization	15/7844	24/18493	0.0378468	0.142048	0.105829	BP
GO:0003171		atrioventricular valve development	15/7844	24/18493	0.0378468	0.142048	0.105829	BP
GO:0008210		estrogen metabolic process	15/7844	24/18493	0.0378468	0.142048	0.105829	BP
GO:0030325		adrenal gland development	15/7844	24/18493	0.0378468	0.142048	0.105829	BP
GO:0032528		microvillus organization	15/7844	24/18493	0.0378468	0.142048	0.105829	BP
GO:0035640		exploration behavior	15/7844	24/18493	0.0378468	0.142048	0.105829	BP
GO:0042537		benzene-containing compound metabolic process	15/7844	24/18493	0.0378468	0.142048	0.105829	BP
GO:0046058		cAMP metabolic process	15/7844	24/18493	0.0378468	0.142048	0.105829	BP
GO:0046457		prostanoid biosynthetic process	15/7844	24/18493	0.0378468	0.142048	0.105829	BP
[truncated: 6,325 more rows]
